# Supplementary material for: Molecular Rearrangement of Pyrazino[2,3-c]quinolin-5(6H)-ones during Their Reaction with Isocyanic Acid
Source: MDPI journal article supplement (doi:10.3390/ijms23105481), 2022-05-13
Supplement: s1 [file s1]

# Molecular Rearrangement of Pyrazino[2,3-*c*]quinolin-5(6*H*)-ones During Their Reaction with Isocyanic Acid

Antonín Klásek <sup>a</sup>, Antonín Lyčka <sup>b</sup>, Filip Křemen <sup>a</sup>, Aleš Růžička <sup>c</sup> and Michal Rouchal <sup>a,\*</sup>

- <sup>a</sup>) Department of Chemistry, Faculty of Technology, Tomas Bata University in Zlín, Vavrečkova 5669, 760 01 Zlín, Czech Republic; (e-mail: rouchal@utb.cz)
- <sup>b</sup>) University of Hradec Králové, Faculty of Science, Rokitanského 62, 530 03 Hradec Králové, Czech Republic
- <sup>c</sup>) Department of General and Inorganic Chemistry, Faculty of Chemical Technology, University of Pardubice, Studentská 573, 532 10 Pardubice, Czech Republic

## SUPPORTING INFORMATION

### Table of Contents

|                                                                                                                                                         |     |
|---------------------------------------------------------------------------------------------------------------------------------------------------------|-----|
| <sup>1</sup> H, <sup>13</sup> C and <sup>15</sup> N NMR spectra of compounds <b>2</b> , <b>3</b> , <b>4</b> , <b>5</b> , <b>6</b> , <b>7</b> , <b>8</b> | S2  |
| Crystal data and structure refinement of compounds <b>5d</b> , <b>7a</b> , <b>7b</b>                                                                    | S35 |
| ESI-MS spectra of compounds <b>2</b> , <b>3</b> , <b>4</b> , <b>5</b> , <b>6</b> , <b>7</b> , <b>8</b>                                                  | S53 |

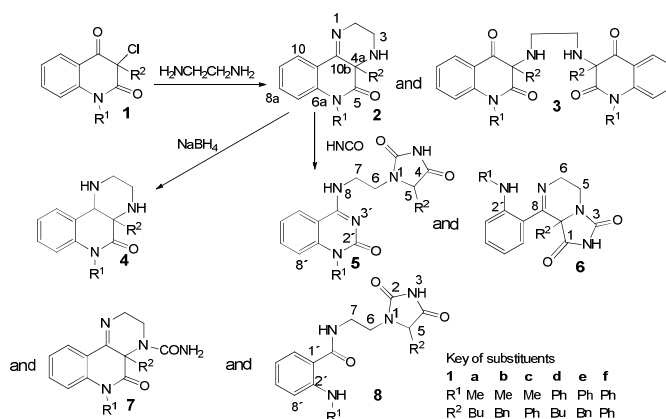

# <sup>1</sup>H, <sup>13</sup>C and <sup>15</sup>N NMR spectra of compounds 2, 3, 4, 5, 6, 7, 8

**Table S1:** <sup>1</sup>H, <sup>13</sup>C and <sup>15</sup>N chemical shifts of compounds **2** in DMSO-d<sub>6</sub>.

| Position            | 2a           |              | 2b           |                     | 2c           |              | 2d                |              | 2e           |              | 2f                |                     |
|---------------------|--------------|--------------|--------------|---------------------|--------------|--------------|-------------------|--------------|--------------|--------------|-------------------|---------------------|
|                     | $\delta$ (H) | $\delta$ (C) | $\delta$ (H) | $\delta$ (C)        | $\delta$ (H) | $\delta$ (C) | $\delta$ (H)      | $\delta$ (C) | $\delta$ (H) | $\delta$ (C) | $\delta$ (H)      | $\delta$ (C)        |
| 1                   | -            | -            | -            | -52.7 <sup>a</sup>  | -            | -            | -                 | -            | -            | -            | -                 | -53.0 <sup>a</sup>  |
| 2                   | 3.82         | 50.2         | 3.64         | 49.8                | 3.96         | 49.9         | 3.88              | 50.2         | 3.73         | 49.8         | 3.97              | 49.9                |
|                     | 3.49         |              | 3.02         |                     | 3.81         |              | 3.57              |              | 3.10         |              | 3.94              |                     |
| 3                   | 2.90         | 39.2         | 2.88         | 38.8                | 2.71         | 37.8         | 2.93              | 39.3         | 2.95         | 38.6         | 2.72              | 37.5                |
|                     | 2.44         |              | 2.45         |                     | 2.65         |              | 2.54              |              | 2.56         |              | 2.60              |                     |
| 4                   | 3.13         | -            | 3.02         | -351.7 <sup>a</sup> | -            | -            | 3.17              | -            | -            | -            | 3.32              | -339.3 <sup>a</sup> |
| 4a                  | -            | 63.2         | -            | 64.1                | -            | 65.6         | -                 | 63.5         | -            | 64.4         | -                 | 66.1                |
| 5                   | -            | 171.7        | -            | 170.8               | -            | 169.2        | -                 | 171.8        | -            | 170.9        | -                 | 169.4               |
| 6                   | -            | -            | -            | -257.6 <sup>a</sup> | -            | -            | -                 | -            | -            | -            | -                 | -234.3 <sup>a</sup> |
| 6a                  | -            | 139.1        | -            | 139.1               | -            | 138.8        | -                 | 139.9        | -            | 140.0        | -                 | 139.7               |
| 7                   | 7.21         | 114.9        | 7.12         | 115.1               | 7.12         | 115.1        | 6.26              | 115.9        | 6.34         | 116.2        | 6.09              | 116.0               |
| 8                   | 7.49         | 131.4        | 7.24         | 131.6               | 7.43         | 131.5        | 7.29              | 131.1        | 7.35         | 131.2        | 7.16              | 131.2               |
| 9                   | 7.18         | 123.3        | 7.19         | 123.3               | 7.14         | 123.4        | 7.13              | 123.4        | 7.19         | 123.5        | 7.08              | 123.5               |
| 10                  | 7.65         | 125.1        | 7.64         | 125.3               | 7.81         | 125.1        | 7.74              | 125.3        | 7.73         | 125.6        | 7.83              | 125.5               |
| 10a                 | -            | 123.9        | -            | 123.8               | -            | 124.2        | -                 | 123.3        | -            | 123.4        | -                 | 123.7               |
| 10b                 | -            | 162.7        | -            | 161.7               | -            | 160.6        | -                 | 162.4        | -            | 161.5        | -                 | 160.2               |
| 1'(R <sup>1</sup> ) | 3.33         | 30.1         | 3.35         | 30.1                | 3.39         | 30.1         | -                 | 139.1        | -            | 137.9        | -                 | 137.8               |
| 2'(R <sup>1</sup> ) | -            | -            | -            | -                   | -            | -            | 7.25 <sup>b</sup> | b            | b            | b            | 7.20 <sup>b</sup> | b                   |
| 3'(R <sup>1</sup> ) | -            | -            | -            | -                   | -            | -            | 7.57              | 130.2        | 7.58         | 130.1        | 7.56              | 130.3               |
| 4'(R <sup>1</sup> ) | -            | -            | -            | -                   | -            | -            | 7.50              | 128.7        | 7.51         | 128.7        | 7.52              | 129.5               |
| 1'(R <sup>2</sup> ) | 1.45         | 39.0         | 2.75         | 44.9                | -            | 139.9        | 1.73              | 39.0         | 3.06         | 44.7         | -                 | 139.4               |
|                     | 1.31         |              | 2.68         |                     |              |              | 1.59              |              | 2.91         |              |                   |                     |
| 2'(R <sup>2</sup> ) | 1.31         | 25.4         | -            | 135.2               | 7.18         | 126.9        | 1.38              | 25.4         | -            | 135.2        | 7.26              | 127.0               |
|                     | 1.05         |              |              |                     |              |              | 1.15              |              |              |              |                   |                     |
| 3'(R <sup>2</sup> ) | 1.05         | 22.0         | 6.94         | 130.4               | 7.29         | 128.5        | 1.15              | 22.0         | 7.10         | 130.6        | 7.35              | 129.5               |
| 4'(R <sup>2</sup> ) | 0.69         | 13.8         | 7.16         | 127.4               | 7.24         | 127.9        | 0.77              | 13.9         | 7.22         | 127.5        | 7.28              | 128.7               |
| 5'(R <sup>2</sup> ) | -            | -            | 7.16         | 126.8               | -            | -            | -                 | -            | 7.22         | 126.9        | -                 | -                   |

<sup>a</sup>  $\delta$ (<sup>15</sup>N)

<sup>b</sup> broad overlapped signals

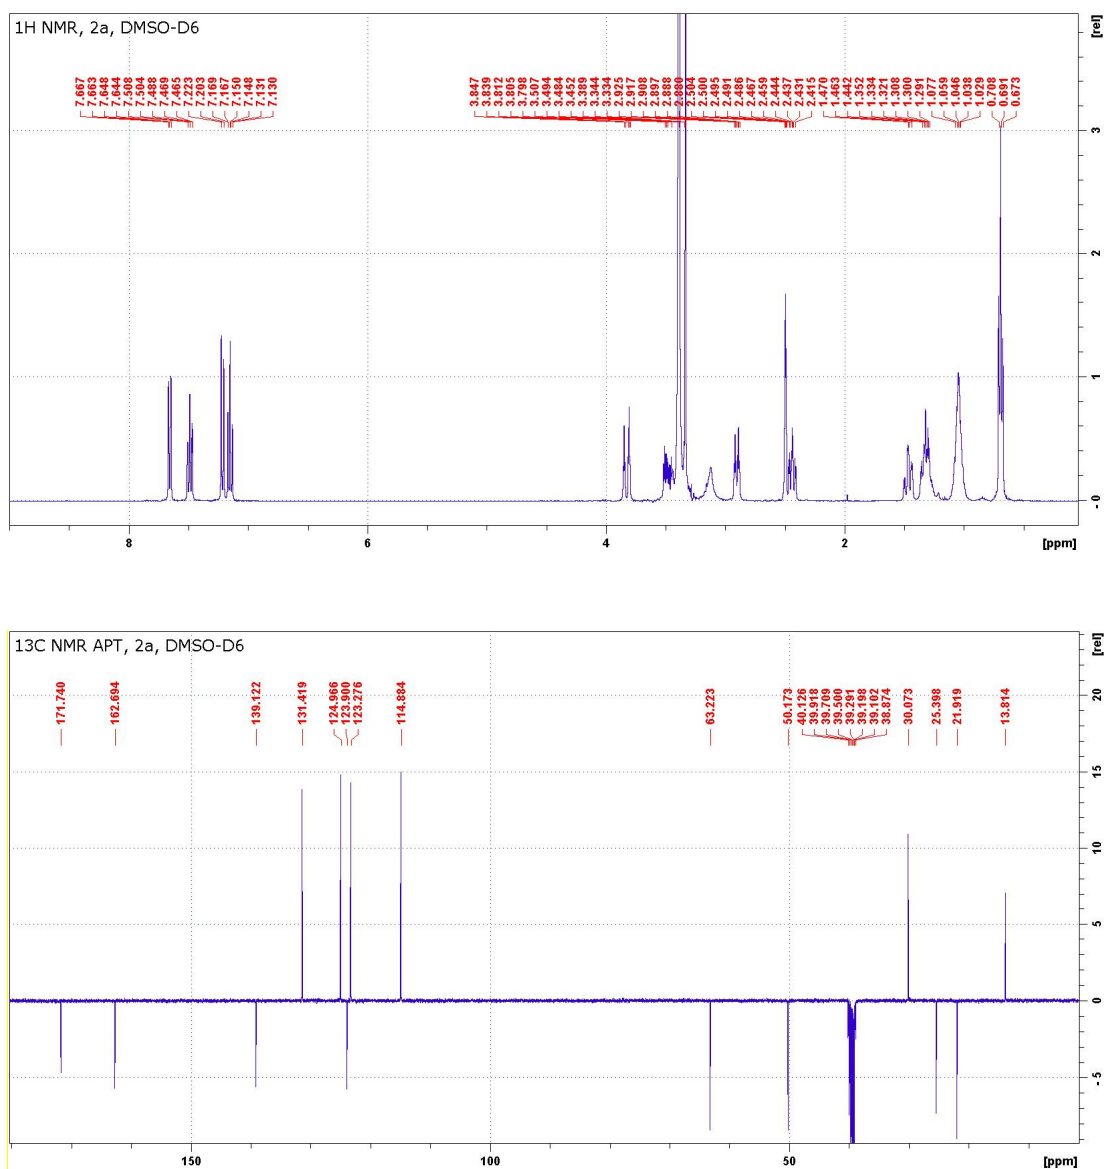

**Figure S1:** <sup>1</sup>H and <sup>13</sup>C NMR spectra of compound 2a.

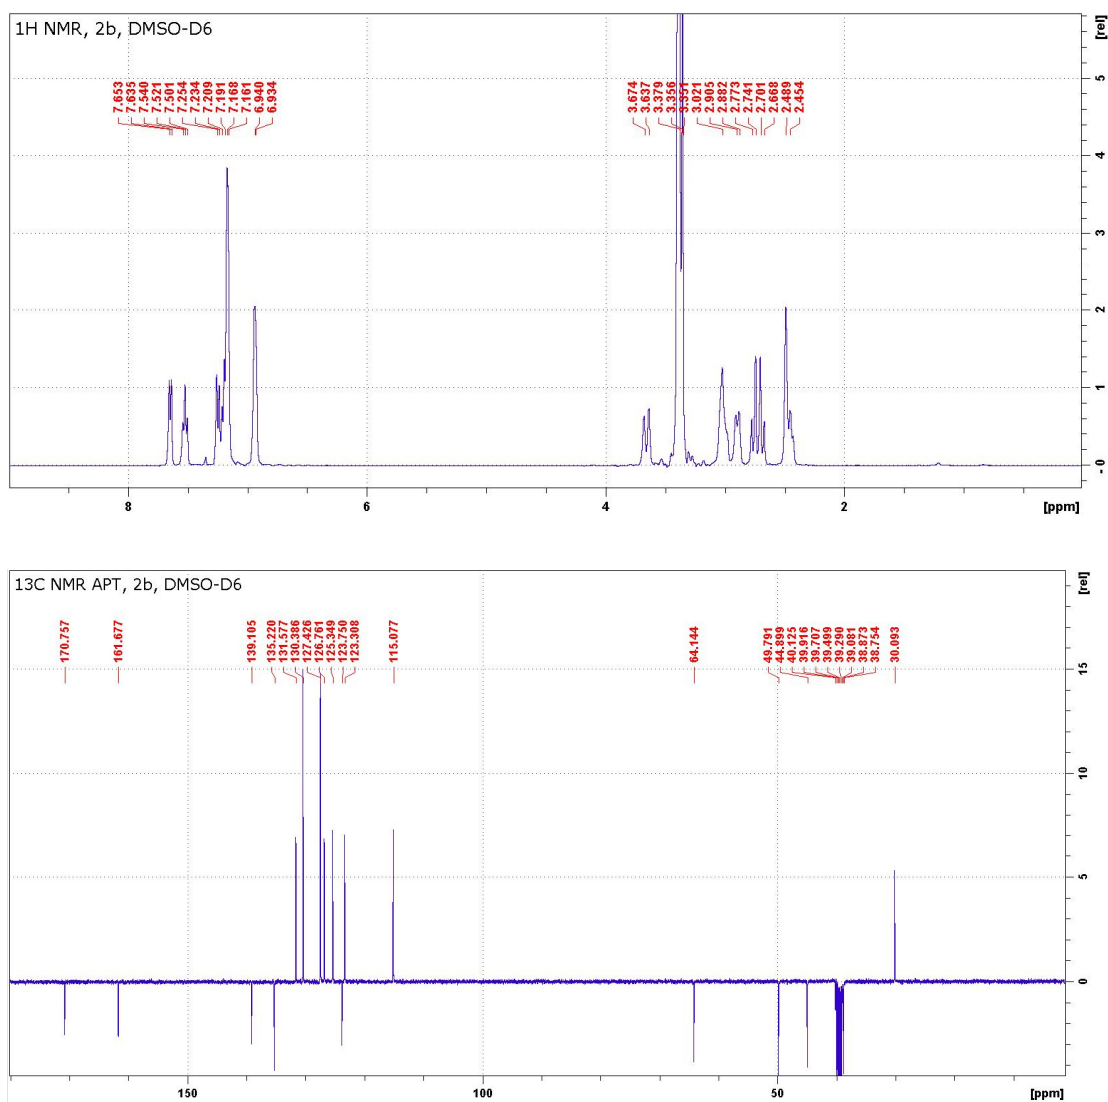

**Figure S2:** <sup>1</sup>H and <sup>13</sup>C NMR spectra of compound 2b.



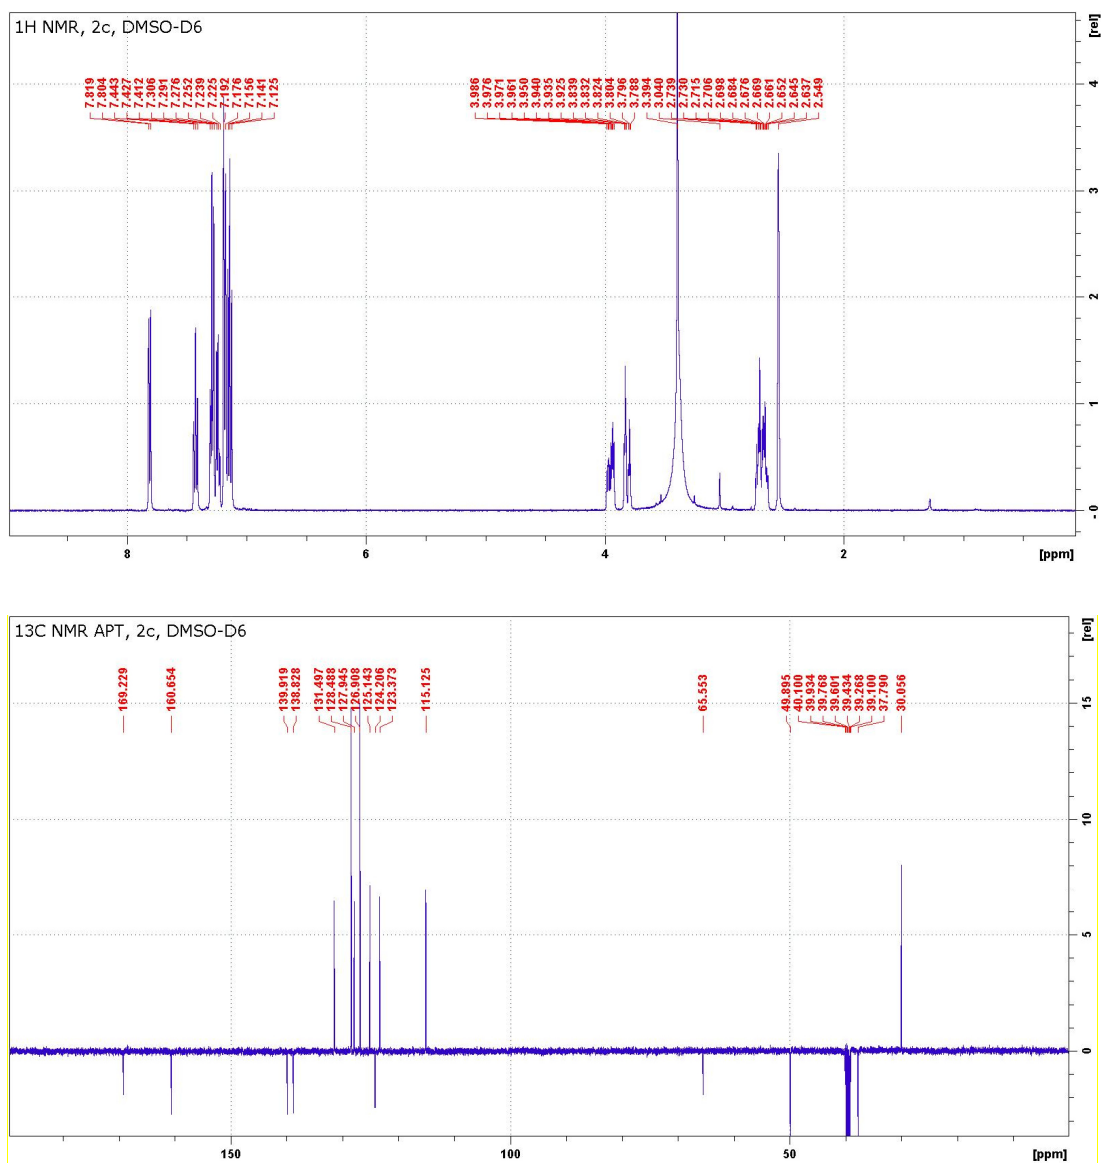

**Figure S3:** <sup>1</sup>H and <sup>13</sup>C NMR spectra of compound 2c.

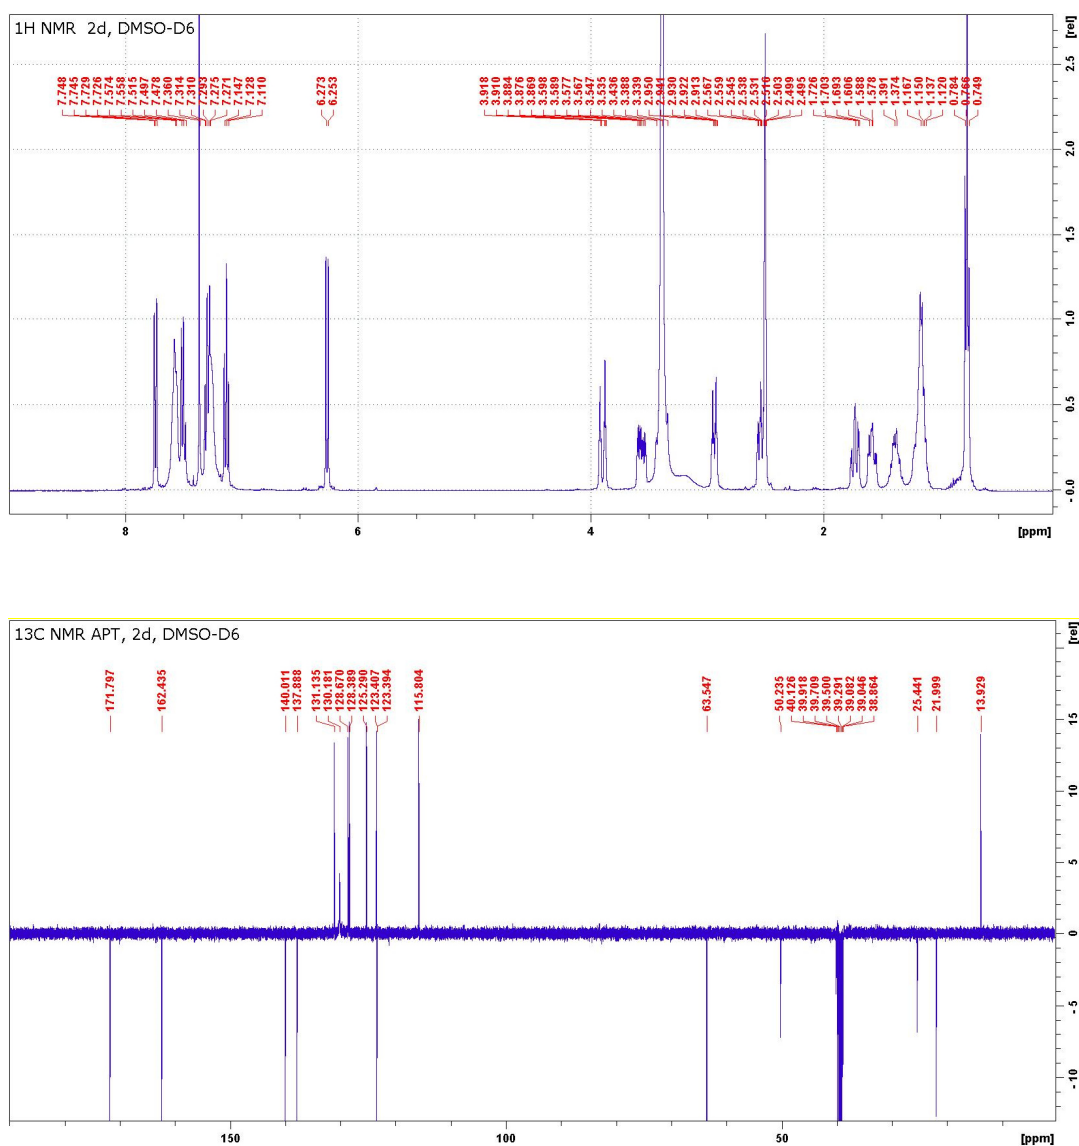

**Figure S4:** <sup>1</sup>H and <sup>13</sup>C NMR spectra of compound 2d.

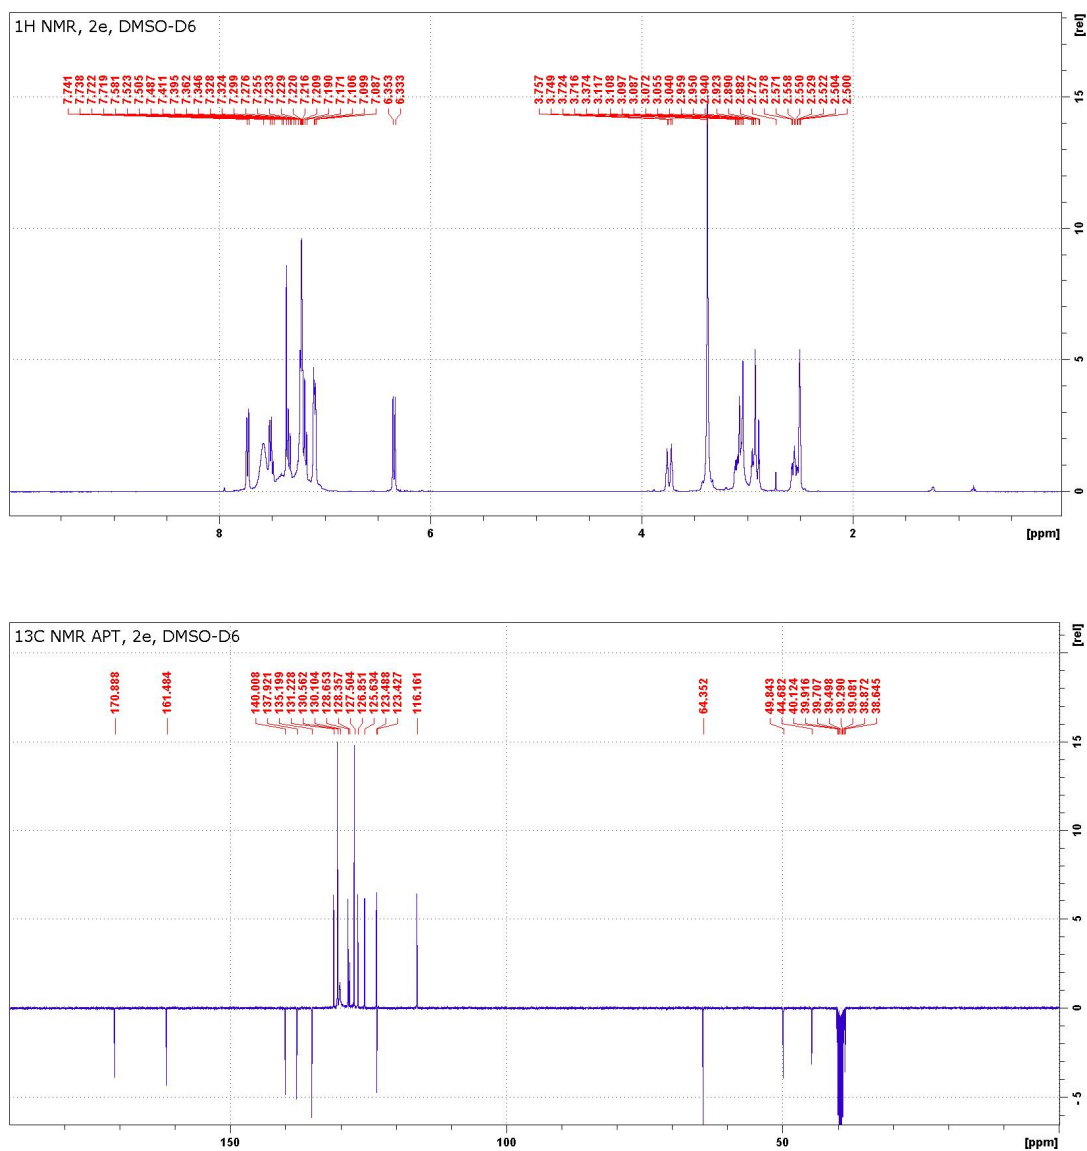

**Figure S5:** <sup>1</sup>H and <sup>13</sup>C NMR spectra of compound **2e**.

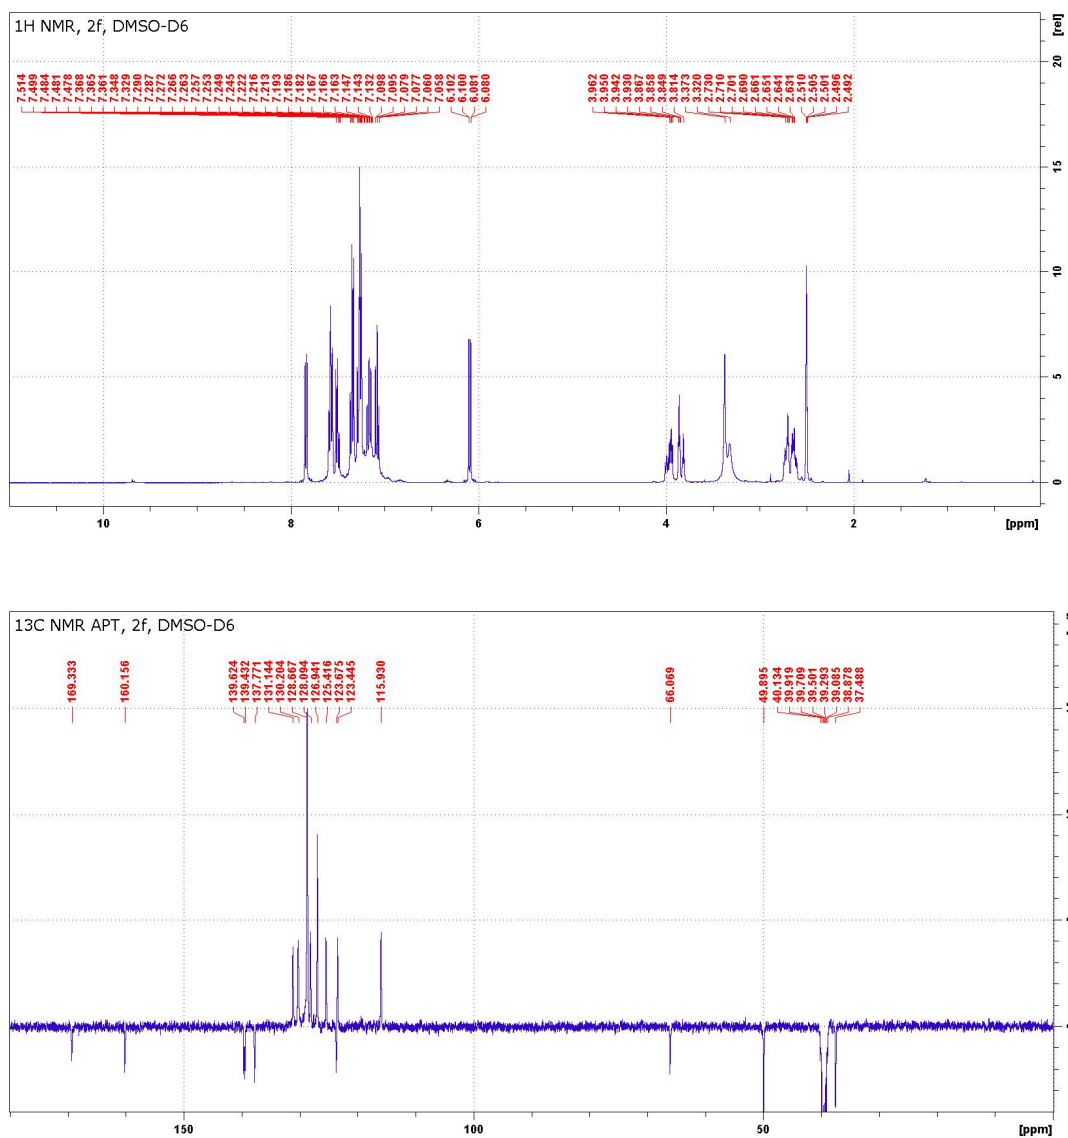

**Figure S6:** <sup>1</sup>H and <sup>13</sup>C NMR spectra of compound **2f**.

**Table S2:**  $^1\text{H}$  and  $^{13}\text{C}$  chemical shifts of diastereoisomers of compound **3c** and **3f** in DMSO- $d_6$ .

| Position            | <b>3c</b>          |                    | <b>3f</b>          |                    |
|---------------------|--------------------|--------------------|--------------------|--------------------|
|                     | $\delta(\text{H})$ | $\delta(\text{C})$ | $\delta(\text{H})$ | $\delta(\text{C})$ |
| 2                   | -                  | 171.32, 171.23     | -                  | 171.33, 171.26     |
| 3                   | -                  | 76.98, 76.96       | -                  | 77.23, 77.19       |
| 4                   | -                  | 193.27, 192.72     | -                  | 193.10, 192.64     |
| 4a                  | -                  | 120.71, 120.60     | -                  | 120.50, 120.44     |
| 5                   | 7.75               | 127.48, 127.39     | a                  | a                  |
| 6                   | 7.17               | 123.29, 123.27     | a                  | 123.48, 123.40     |
| 7                   | 7.69               | 136.41, 136.39     | 7.46               | 135.93             |
|                     | 7.39               | 115.99, 115.96     | 6.32               | 116.59, 116.55     |
| 8a                  | -                  | 142.3              | -                  | 142.0              |
| NH                  | 2.60               | -                  | -                  | -                  |
| CH <sub>2</sub>     | 2.59, 2.48         | 45.38, 45.17       | 2.58, 2.51         | 45.33, 45.17       |
| 1'(R <sup>1</sup> ) | 3.53, 3.50         | 30.03, 30.00       | -                  | 139.63, 139.43     |
| 2'(R <sup>1</sup> ) | -                  | -                  | a                  | a                  |
| 3'(R <sup>1</sup> ) | -                  | -                  | a                  | a                  |
| 4'(R <sup>1</sup> ) | -                  | -                  | a                  | a                  |
| 1'(R <sup>2</sup> ) | -                  | 137.91, 137.86     | -                  | 137.78, 137.44     |
| 2'(R <sup>2</sup> ) | 7.31               | 126.69, 126.64     | a                  | a                  |
| 3'(R <sup>2</sup> ) | 7.28               | 128.84, 128.79     | a                  | a                  |
| 4'(R <sup>2</sup> ) | 7.28               | 128.66, 128.62     | a                  | a                  |

<sup>a</sup> very low soluble compound, broadened overlapped signals, 7.12–7.82/126.9–131.2

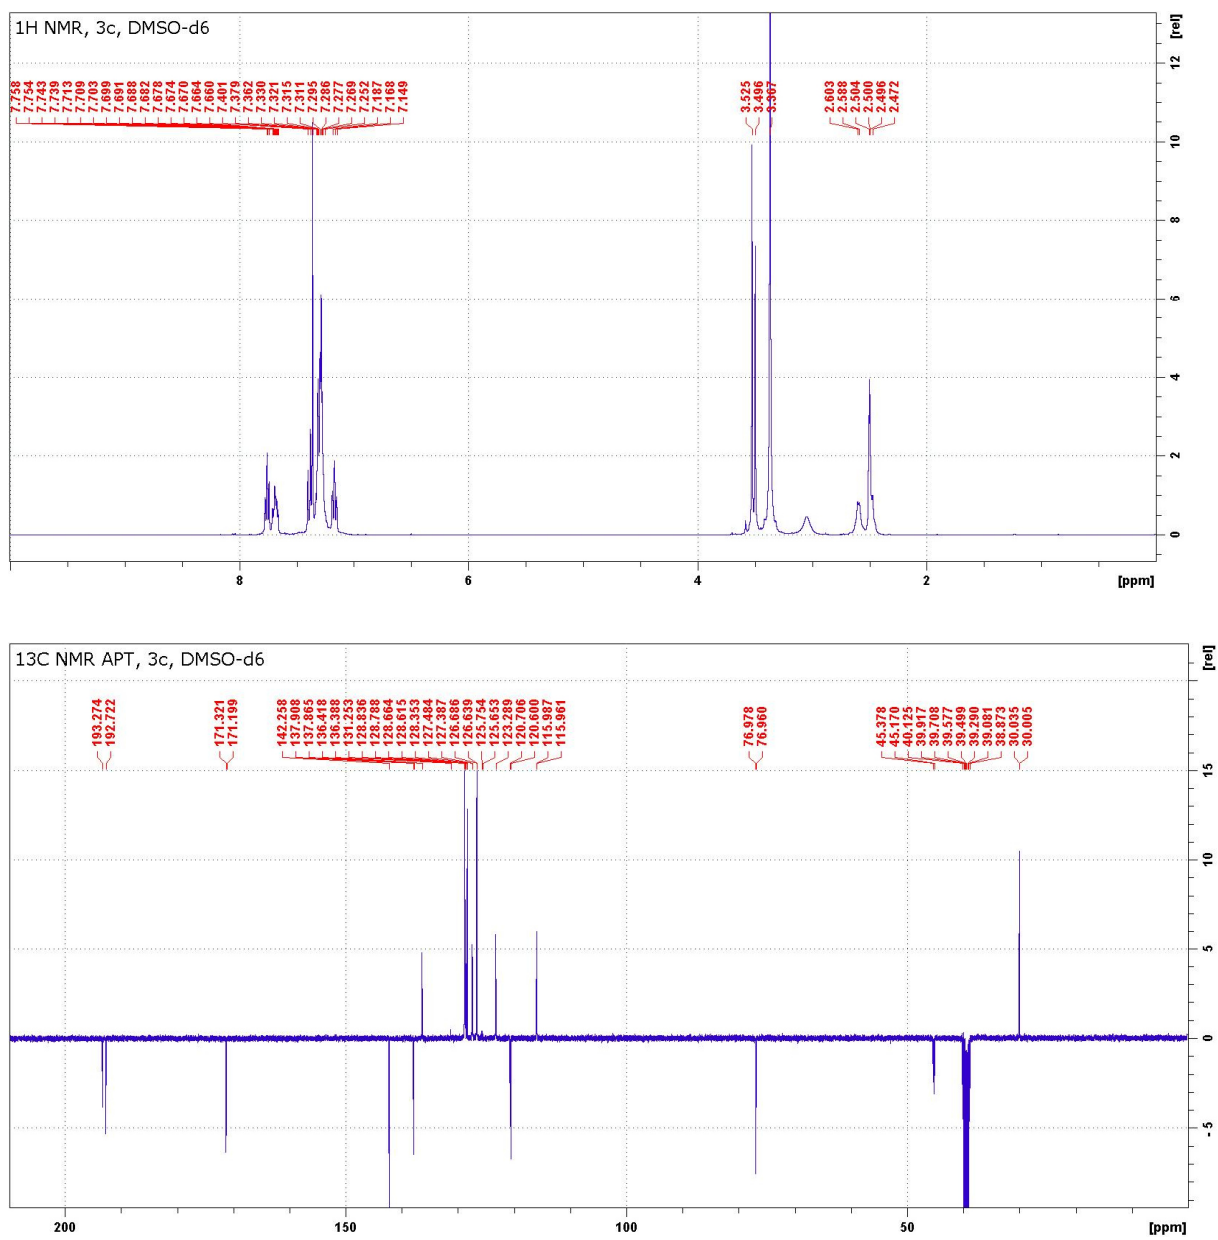

**Figure S7:** <sup>1</sup>H and <sup>13</sup>C NMR spectra of compound **3c**.

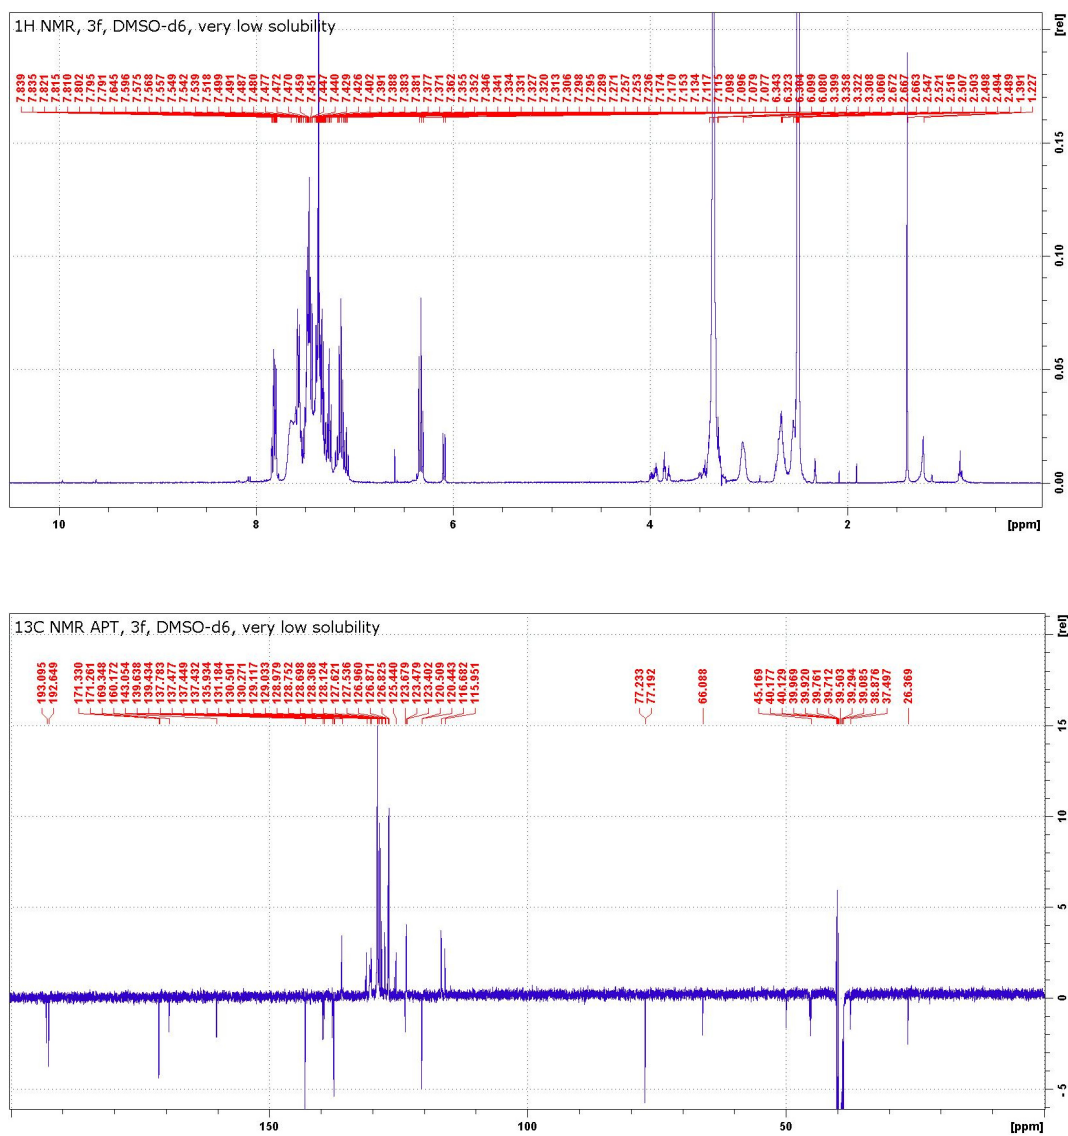

**Figure S8:** <sup>1</sup>H and <sup>13</sup>C NMR spectra of compound 3f.

**Table S3:**  $^1\text{H}$ ,  $^{13}\text{C}$  and  $^{15}\text{N}$  chemical shifts of compounds **4** in DMSO- $\text{d}_6$ .

| Position            | 4a                 |                    | 4b                 |                    | 4c                 |                    | 4d                 |                     | 4e                 |                    | 4f                 |                    |
|---------------------|--------------------|--------------------|--------------------|--------------------|--------------------|--------------------|--------------------|---------------------|--------------------|--------------------|--------------------|--------------------|
|                     | $\delta(\text{H})$ | $\delta(\text{C})$ | $\delta(\text{H})$ | $\delta(\text{C})$ | $\delta(\text{H})$ | $\delta(\text{C})$ | $\delta(\text{H})$ | $\delta(\text{C})$  | $\delta(\text{H})$ | $\delta(\text{C})$ | $\delta(\text{H})$ | $\delta(\text{C})$ |
| 1                   | -                  | -                  | a                  | -                  | -                  | -                  | -                  | -344.6 <sup>b</sup> | -                  | -                  | -                  | -                  |
| 2                   | 2.90               | 45.4               | 3.11               | 45.5               | 2.99               | 46.1               | 2.96               | 45.4                | 3.08               | 45.5               | 3.09               | 45.5               |
|                     | 2.68               |                    | 3.03               |                    | 2.87               |                    | 2.74               |                     | 2.82               |                    | 2.96               |                    |
| 3                   | 2.65               | 39.9               | 2.77               | 40.1               | 2.60               | 40.4               | 2.73               | 39.7                | 3.15               | 40.4               | 2.70               | 40.1               |
|                     | 2.61               |                    | 2.71               |                    | 2.32               |                    | 2.66               |                     | 2.74               |                    | 2.43               |                    |
| 4                   | -                  | -                  | a                  | -                  | -                  | -                  | -                  | -354.2 <sup>b</sup> | -                  | -                  | -                  | -                  |
| 4a                  | -                  | 56.9               | -                  | 58.6               | -                  | 59.7               | -                  | 57.5                | -                  | 58.8               | -                  | 60.3               |
| 5                   | -                  | 171.6              | -                  | 170.4              | -                  | 170.4              | -                  | 171.8               | -                  | 170.4              | -                  | 170.2              |
| 6                   | -                  | -                  | -                  | -                  | -                  | -                  | -                  | -235.0 <sup>b</sup> | -                  | -                  | -                  | -                  |
| 6a                  | -                  | 138.1              | -                  | 138.2              | -                  | 138.0              | -                  | 138.6               | -                  | 138.5              | -                  | 138.2              |
| 7                   | 7.06               | 114.1              | 7.13               | 114.3              | 6.95               | 114.7              | 6.15               | 115.5               | 6.29               | 116.1              | 6.01               | 115.8              |
| 8                   | 7.27               | 127.6              | 7.37               | 127.8              | 7.20               | 127.4              | 7.07               | 127.4               | 7.14               | 127.5              | 6.98               | 127.1              |
| 9                   | 7.27               | 123.4              | 7.32               | 123.5              | 7.13               | 123.1              | 7.04               | 123.9               | 7.14               | 123.8              | 7.11               | 123.3              |
| 10                  | 7.06               | 122.7              | 7.13               | 122.8              | 7.49               | 122.8              | 7.35               | 123.0               | 7.44               | 123.1              | 7.53               | 123.2              |
| 10a                 | -                  | 127.4              | -                  | 127.3              | -                  | 128.3              | -                  | 127.1               | -                  | 127.4              | -                  | 127.8              |
| 10b                 | 3.87               | 58.2               | 3.98               | 58.4               | 4.25               | 58.0               | 4.15               | 58.2                | 4.27               | 58.6               | 4.55               | 57.5               |
| 1'(R <sup>1</sup> ) | 3.24               | 29.3               | 3.24               | 29.3               | 3.23               | 29.8               | -                  | 139.2               | -                  | 139.2              | -                  | 138.2              |
| 2'(R <sup>1</sup> ) | -                  | -                  | -                  | -                  | -                  | -                  | 7.15               | 129.2               | 7.16               | 129.1              | 7.08               | 128.7              |
| 3'(R <sup>1</sup> ) | -                  | -                  | -                  | -                  | -                  | -                  | 7.54               | 130.0               | 7.52               | 129.8              | 7.52               | 129.9              |
| 4'(R <sup>1</sup> ) | -                  | -                  | -                  | -                  | -                  | -                  | 7.44               | 128.2               | 7.43               | 128.0              | 7.43               | 128.2              |
| 1'(R <sup>2</sup> ) | 1.96               | 22.6               | 3.21               | 29.7               | -                  | 137.4              | 2.08               | 22.7                | 3.36               | 29.8               | -                  | 136.9              |
|                     | 0.57               |                    | 2.04               |                    |                    |                    | 0.89               |                     | 2.27               |                    |                    |                    |
| 2'(R <sup>2</sup> ) | 1.14               | 24.1               | -                  | 136.7              | 7.46               | 129.1              | 1.26               | 24.3                | -                  | 136.7              | 7.64               | 129.3              |
|                     | 0.86               |                    |                    |                    |                    |                    | 1.02               |                     |                    |                    |                    |                    |
| 3'(R <sup>2</sup> ) | 1.05               | 22.4               | 6.80               | 129.7              | 7.05               | 127.3              | 1.18               | 22.5                | 7.04               | 129.9              | 7.16               | 127.5              |
| 4'(R <sup>2</sup> ) | 0.73               | 14.0               | 7.15               | 127.9              | 7.05               | 126.7              | 0.80               | 14.1                | 7.26               | 128.1              | 7.16               | 127.1              |
| 5'(R <sup>2</sup> ) | -                  | -                  | 7.15               | 126.1              | -                  | -                  | -                  | -                   | 7.16               | 126.2              | -                  | -                  |

<sup>a</sup>  $\delta(\text{NH}) = 2.92$  and  $2.12$ ; <sup>b</sup>  $\delta(^{15}\text{N})$



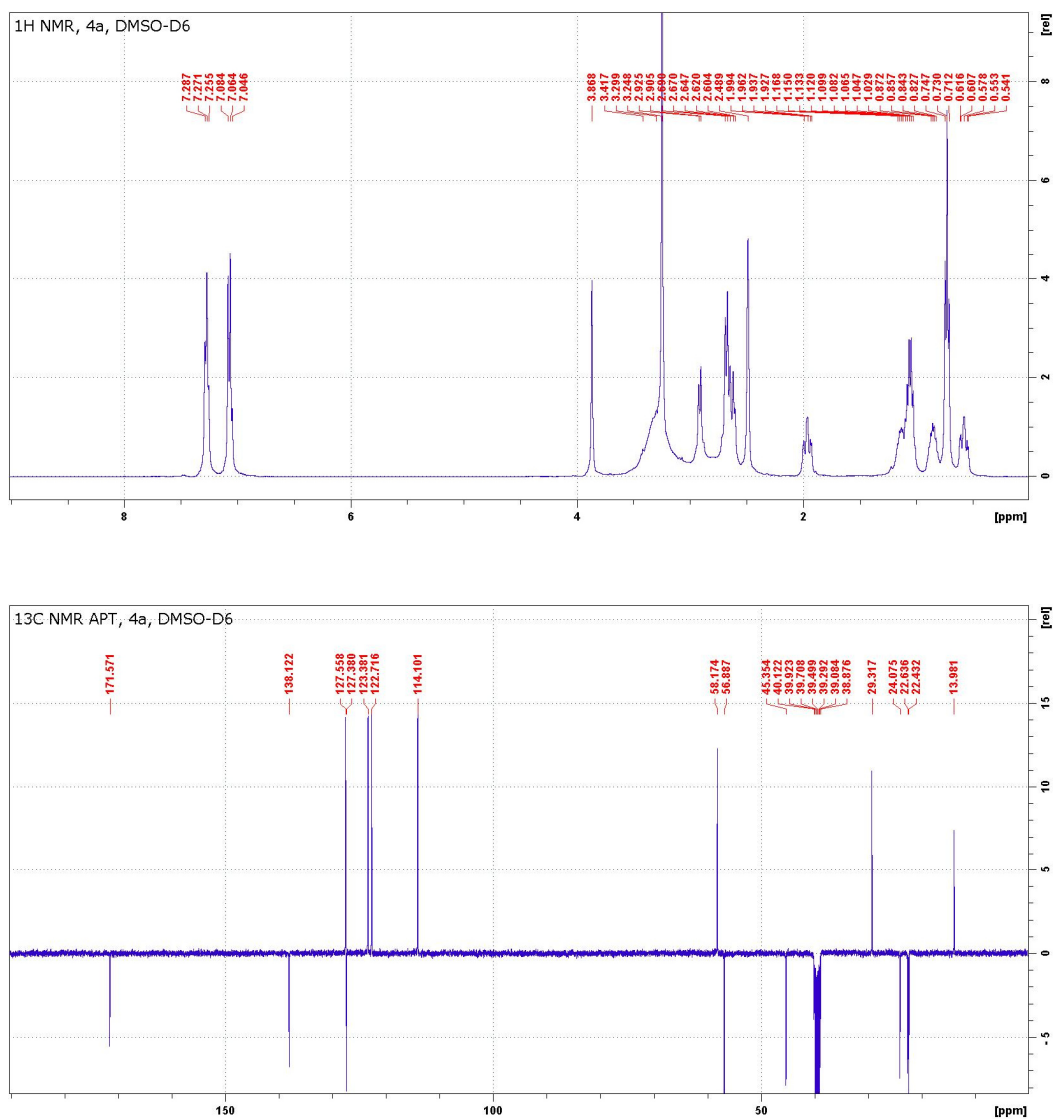

**Figure S9:** <sup>1</sup>H and <sup>13</sup>C NMR spectra of compound **4a**.

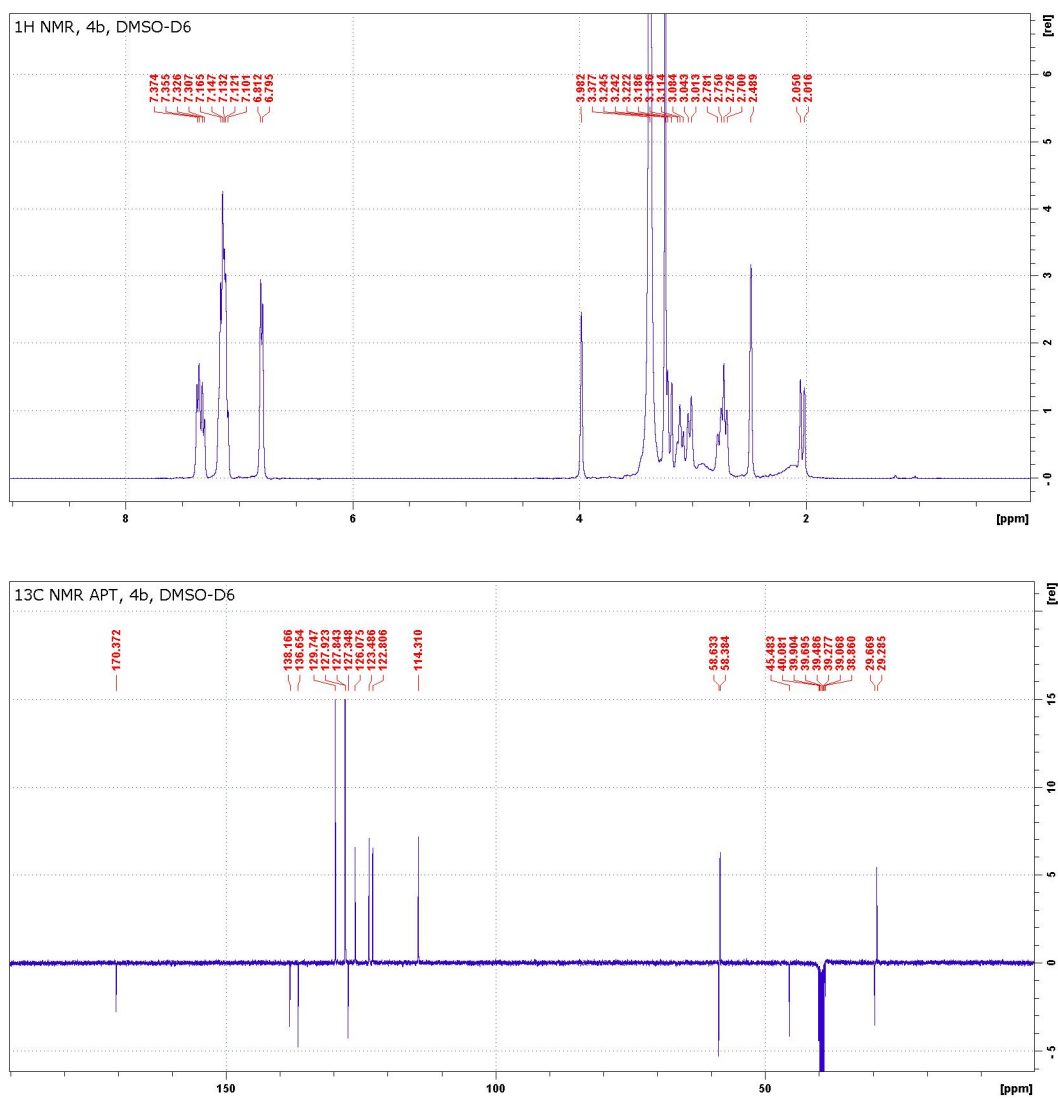

**Figure S10:** <sup>1</sup>H and <sup>13</sup>C NMR spectra of compound **4b**.

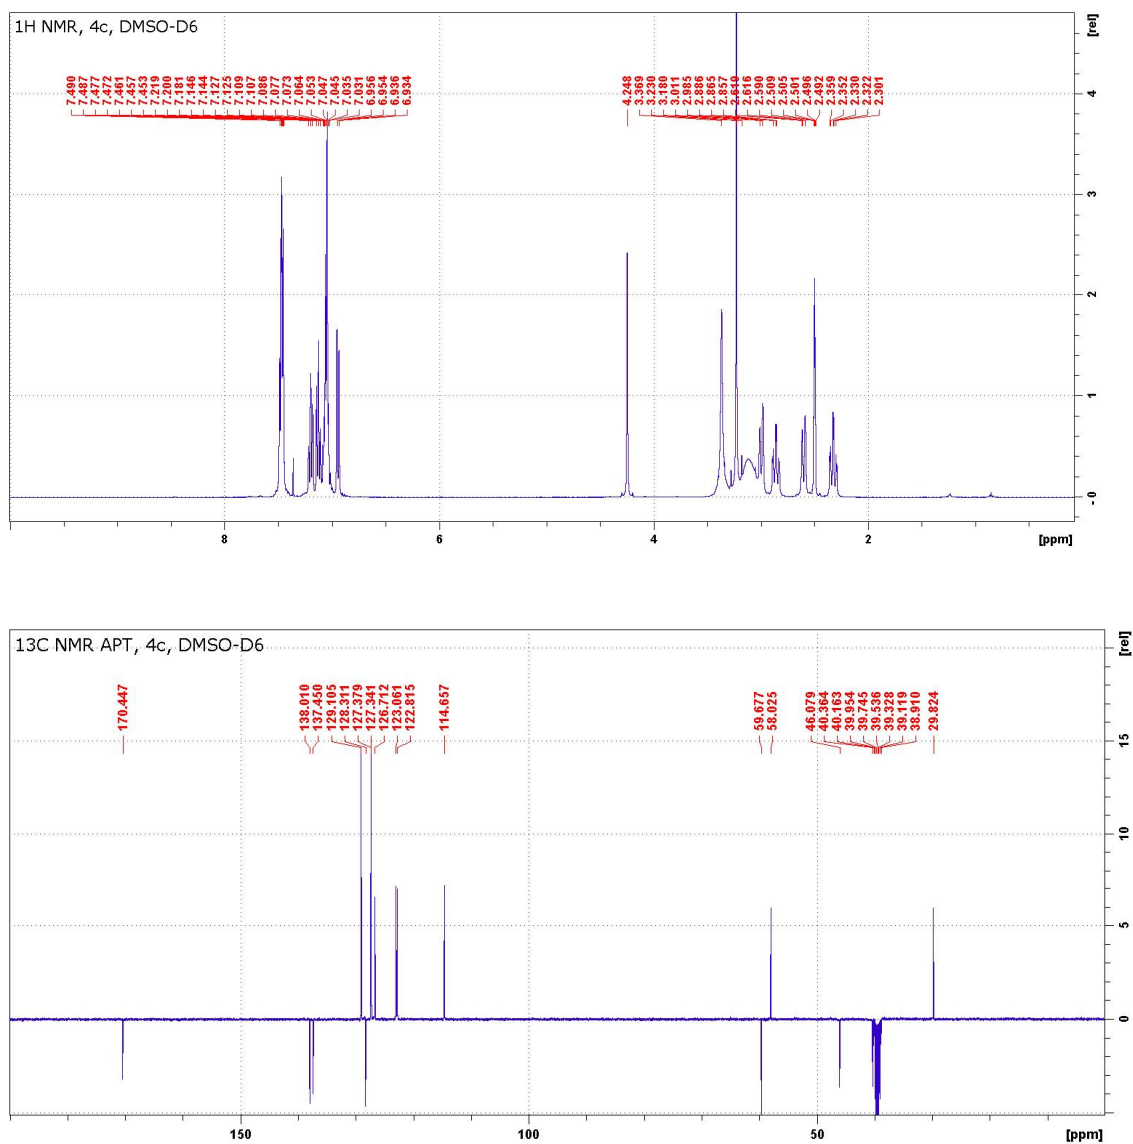

**Figure S11:** <sup>1</sup>H and <sup>13</sup>C NMR spectra of compound **4c**.

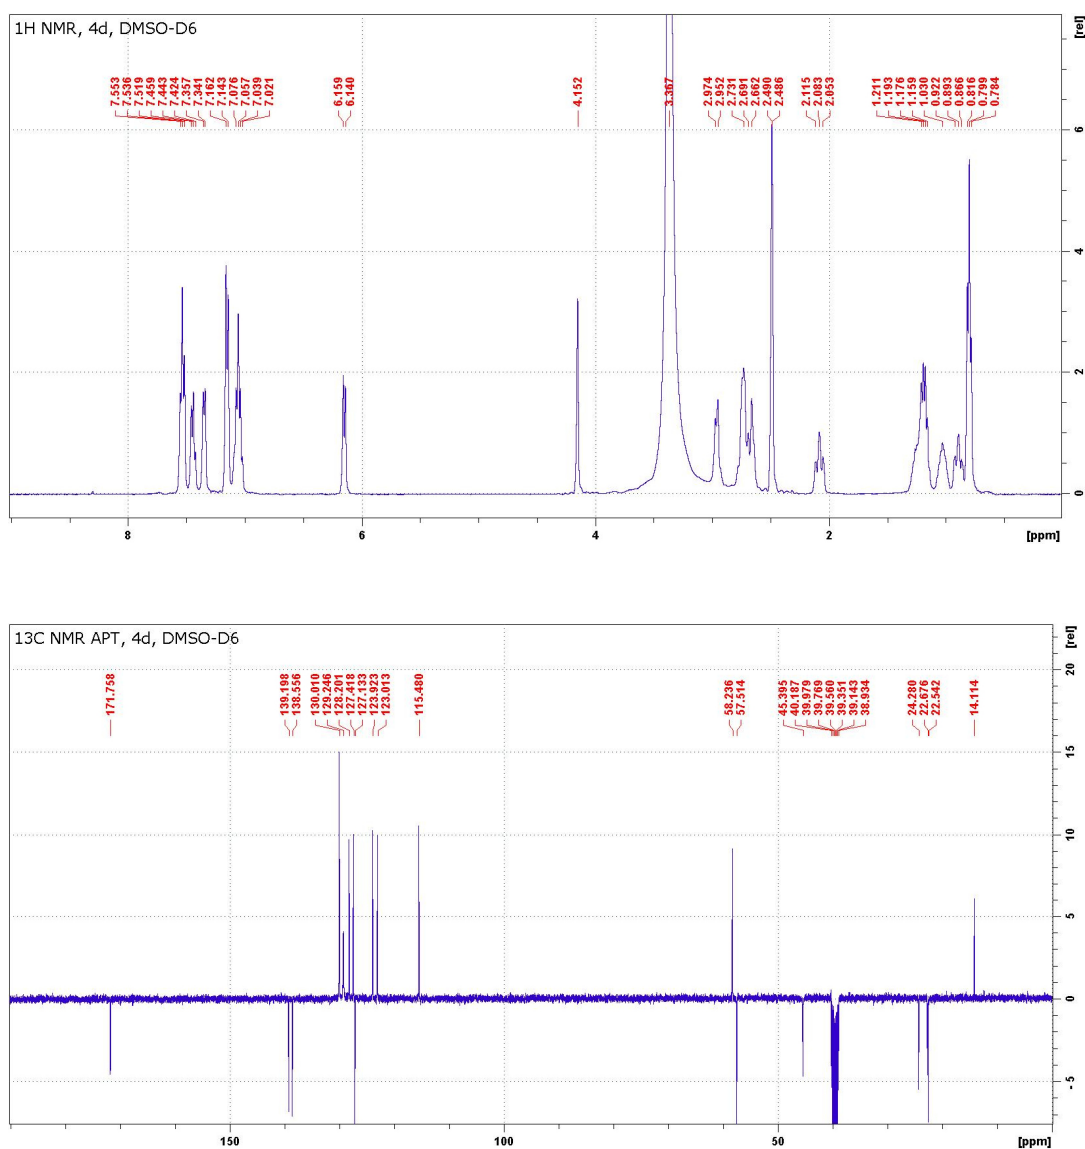

**Figure S12:** <sup>1</sup>H and <sup>13</sup>C NMR spectra of compound **4d**.

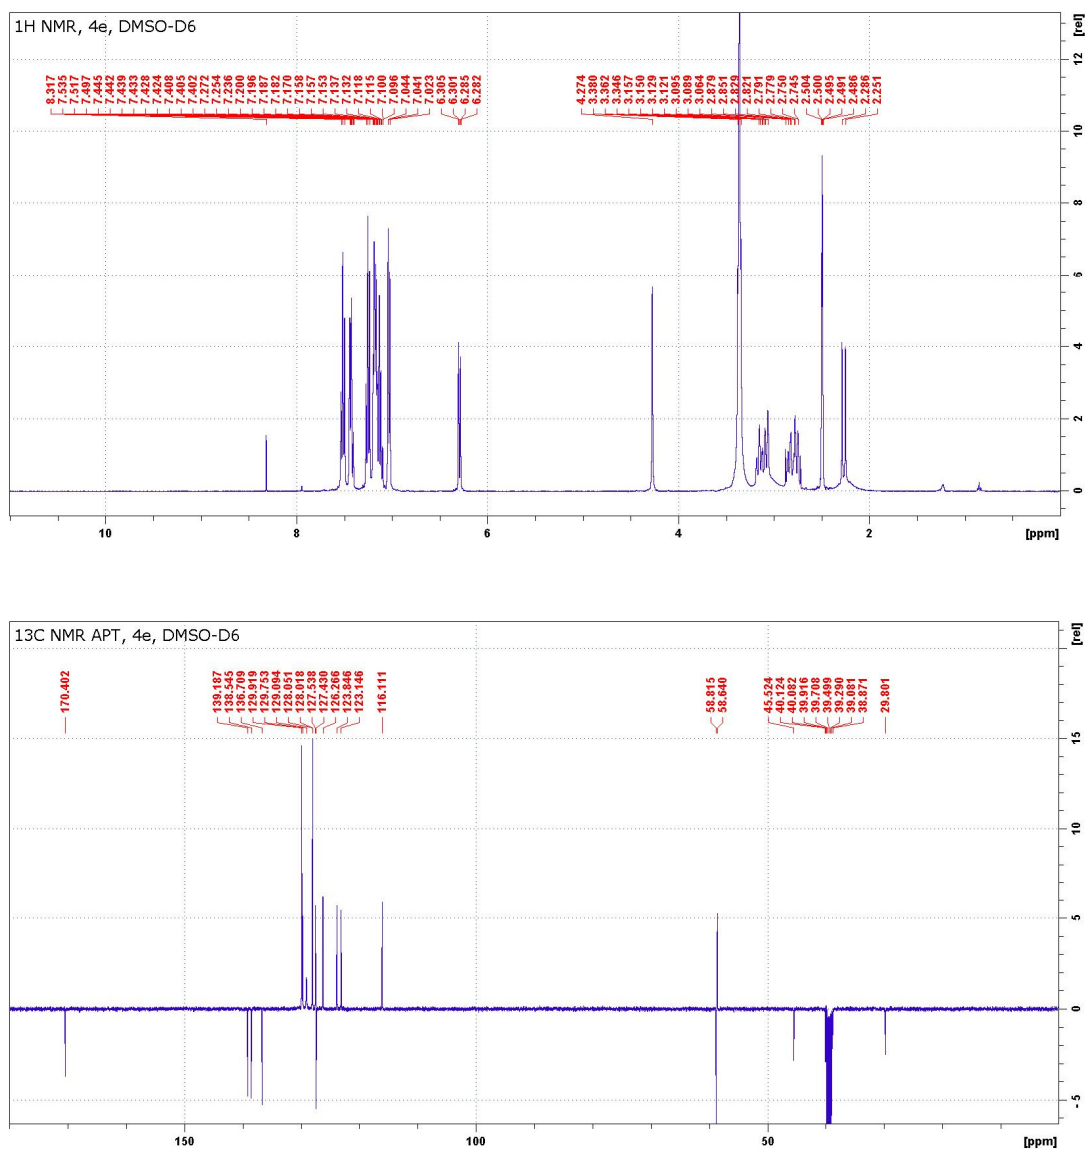

**Figure S13:** <sup>1</sup>H and <sup>13</sup>C NMR spectra of compound 4e.

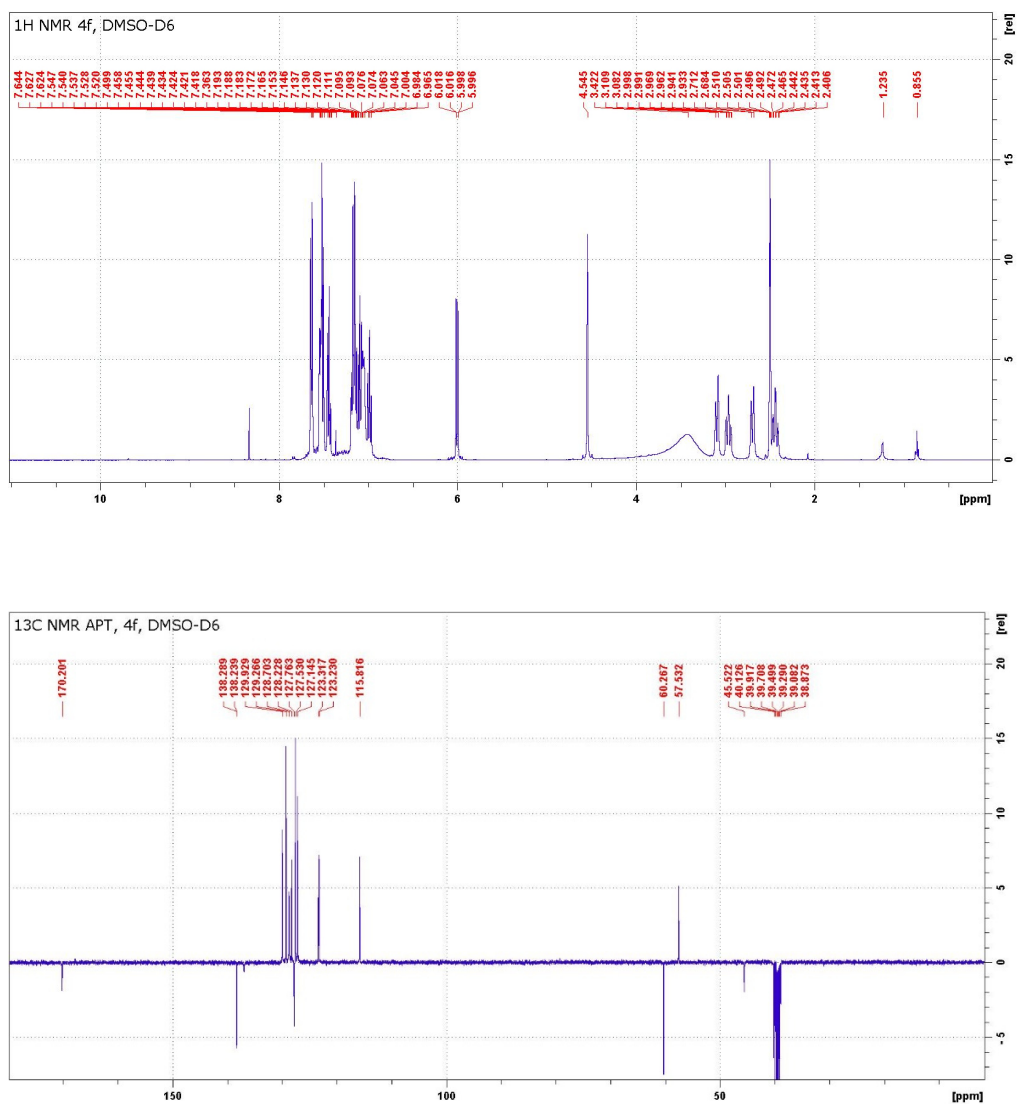

**Figure S15:** <sup>1</sup>H and <sup>13</sup>C NMR spectra of compound **4f**.

**Table S4:**  $^1\text{H}$ ,  $^{13}\text{C}$  and  $^{15}\text{N}$  chemical shifts and  $^1J(^{15}\text{N}, ^1\text{H})$  coupling constants of compounds **5** in DMSO- $d_6$ .

| Position            | 5b                 |                     | 5d                 |                     | 5e                 |                     |
|---------------------|--------------------|---------------------|--------------------|---------------------|--------------------|---------------------|
|                     | $\delta(\text{H})$ | $\delta(\text{C})$  | $\delta(\text{H})$ | $\delta(\text{C})$  | $\delta(\text{H})$ | $\delta(\text{C})$  |
| 1                   | -                  | -286.8 <sup>a</sup> | -                  | -286.4 <sup>a</sup> | -                  | -287.6 <sup>a</sup> |
| 2                   | -                  | 156.5               | -                  | 156.92              | -                  | 156.6               |
| 3                   | 10.53              | n.o.                | 10.78              | n.o.                | 10.58              | 232.2 <sup>a</sup>  |
|                     |                    | 95.2 <sup>b</sup>   |                    | 90.8 <sup>b</sup>   |                    | 94.6 <sup>b</sup>   |
| 4                   | -                  | 173.8               | -                  | 174.6               | -                  | 173.8               |
| 5                   | 4.55               | 60.6                | 4.26               | 59.9                | 4.60               | 60.6                |
| 6                   | 3.61               | 38.7                | 3.67               | 38.8                | 3.69               | 38.8                |
| 7                   | 3.85               | 38.1                | 3.82               | 38.6                | 3.82               | 38.2                |
|                     | 3.17               |                     | 3.24               |                     | 3.20               |                     |
| 8                   | 8.37               | -286.8 <sup>a</sup> | 8.58               | -285.0 <sup>a</sup> | 8.56               | -285.0 <sup>a</sup> |
|                     |                    | 88.5 <sup>b</sup>   |                    | 92.4 <sup>b</sup>   |                    | 92.7 <sup>b</sup>   |
| 1'                  | -                  | -262.9 <sup>a</sup> | -                  | -241.2 <sup>a</sup> | -                  | -241.1 <sup>a</sup> |
| 2'                  | -                  | 155.2               | -                  | 154.6               | -                  | 154.5               |
| 3'                  | -                  | -171.2 <sup>a</sup> | -                  | -171.4 <sup>a</sup> | -                  | -171.7 <sup>a</sup> |
| 4'                  | -                  | 160.0               | -                  | 160.6               | -                  | 160.6               |
| 4a'                 | -                  | 109.8               | -                  | 109.4               | -                  | 109.4               |
| 5'                  | 7.95               | 123.7               | 8.04               | 123.7               | 8.02               | 123.6               |
| 6'                  | 7.20               | 121.0               | 7.19               | 121.4               | 7.21               | 121.3               |
| 7'                  | 7.67               | 133.9               | 7.45               | 133.6               | 7.49               | 133.5               |
| 8'                  | 7.34               | 114.4               | 6.40               | 115.0               | 6.41               | 115.0               |
| 8a'                 | -                  | 142.8               | -                  | 143.7               | -                  | 143.7               |
| 1'(R <sup>1</sup> ) | 3.43               | 30.0                | -                  | 138.2               | -                  | 138.2               |
| 2'(R <sup>1</sup> ) | -                  | -                   | 7.26               | 128.3               | 7.24               | 128.2               |
| 3'(R <sup>1</sup> ) | -                  | -                   | 7.58               | 129.9               | 7.59               | 129.9               |
| 4'(R <sup>1</sup> ) | -                  | -                   | 7.49               | 128.3               | 7.50               | 128.2               |
| 1'(R <sup>2</sup> ) | 3.14               | 33.4                | 1.76               | 27.4                | 3.20               | 30.9                |
|                     | 3.01               |                     | 1.73               |                     | 3.05               |                     |
| 2'(R <sup>2</sup> ) | -                  | 135.4               | 1.20               | 25.0                | -                  | 135.4               |
|                     |                    |                     | 1.04               |                     |                    |                     |
| 3'(R <sup>2</sup> ) | 7.10               | 128.2               | 1.20               | 21.9                | 7.14               | 128.2               |
| 4'(R <sup>2</sup> ) | 7.20               | 129.4               | 0.79               | 13.8                | 7.28               | 129.4               |
| 5(R <sup>2</sup> )  | 7.20               | 126.7               | -                  | -                   | 7.22               | 126.7               |

<sup>a</sup>  $\delta(^{15}\text{N})$ ; <sup>b</sup>  $^1J(^{15}\text{N}, ^1\text{H})$

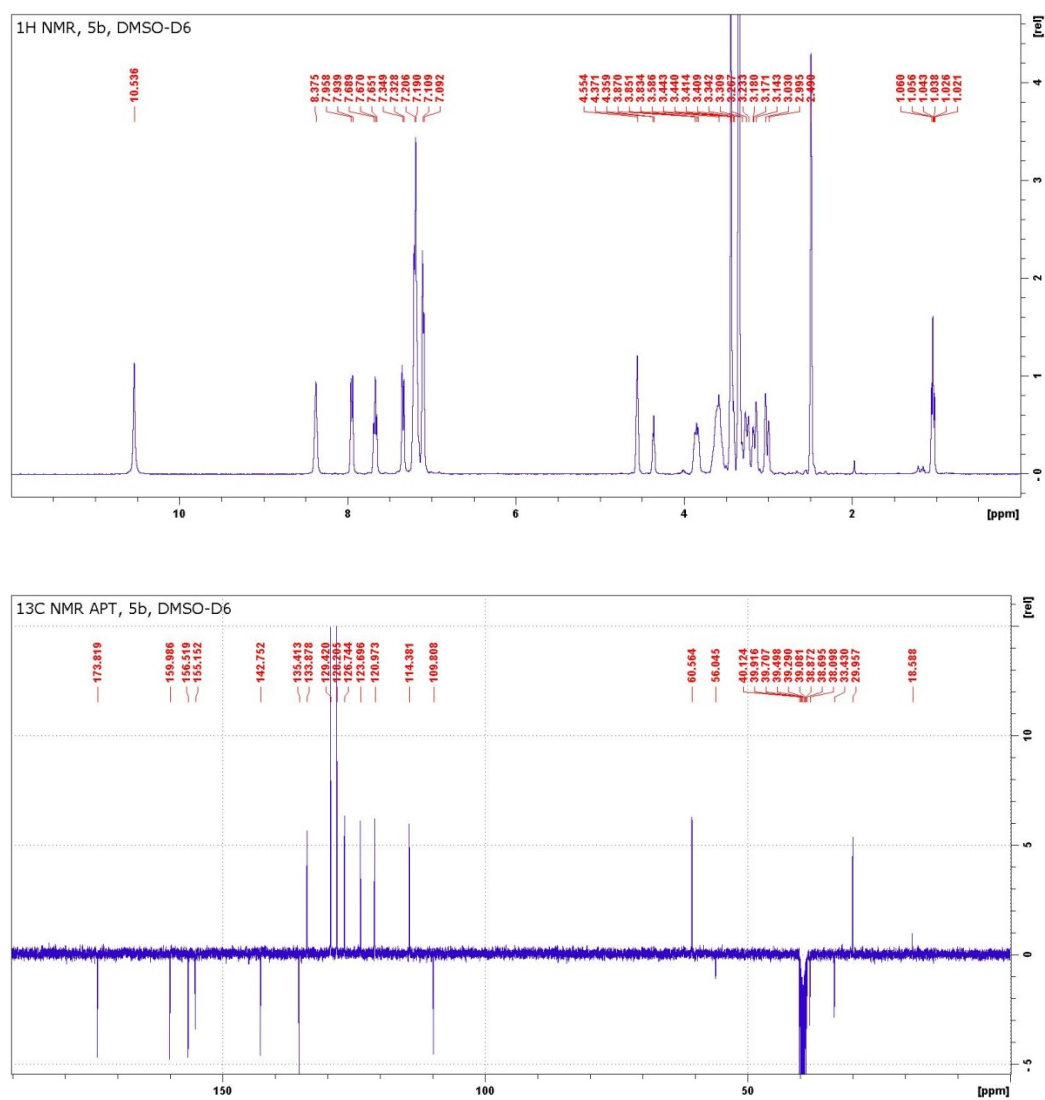

**Figure S16:**  $^1\text{H}$  and  $^{13}\text{C}$  NMR spectra of compound **5b**.



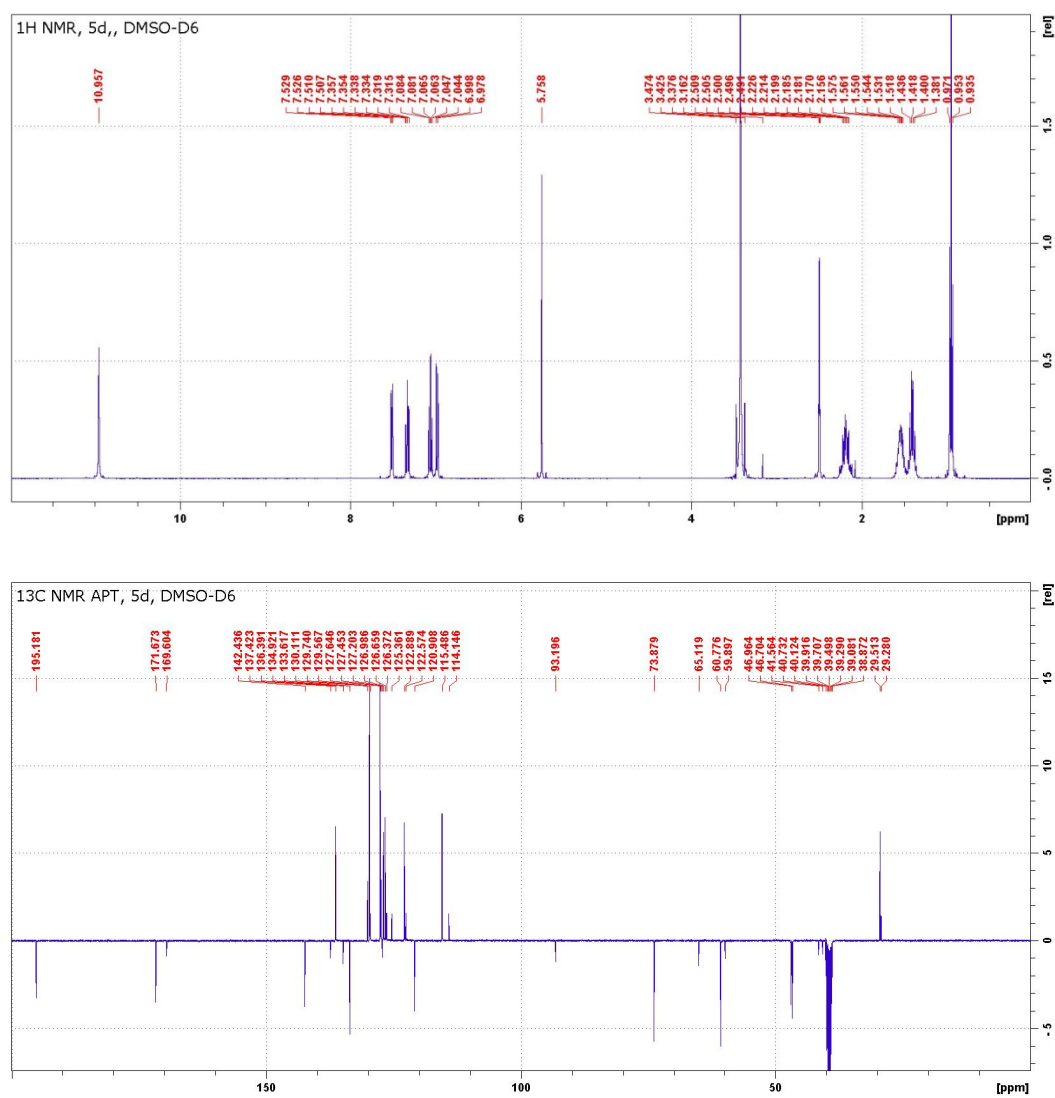

Figure S17: <sup>1</sup>H and <sup>13</sup>C NMR spectra of compound **5d**.

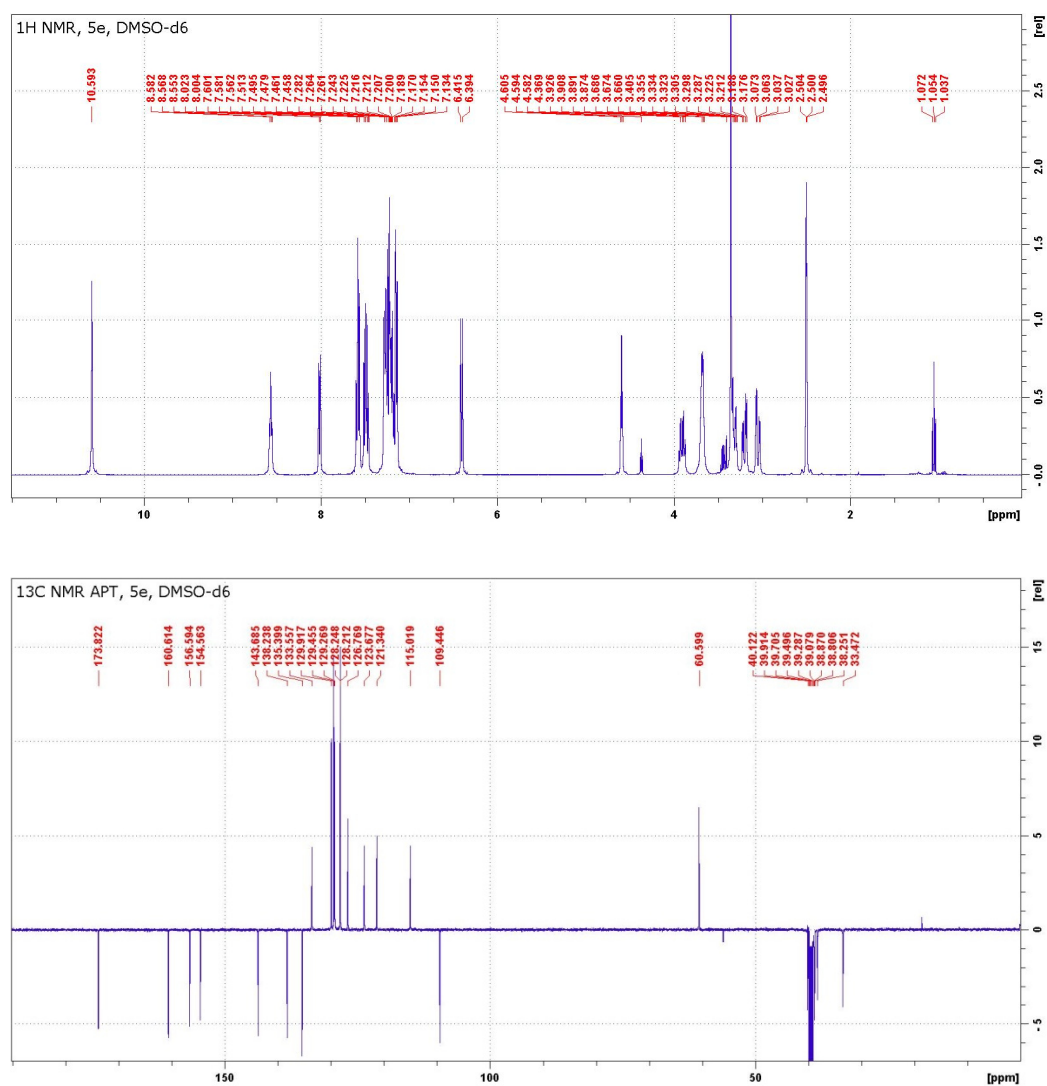

**Figure S18:** <sup>1</sup>H and <sup>13</sup>C NMR spectra of compound **5e**.

**Table S5:**  $^1\text{H}$ ,  $^{13}\text{C}$  and  $^{15}\text{N}$  chemical shifts of compounds **6** in DMSO- $\text{d}_6$ 

| Position            | <b>6d</b>          |                     | <b>6e</b>          |                     | <b>6f</b>          |                     |
|---------------------|--------------------|---------------------|--------------------|---------------------|--------------------|---------------------|
|                     | $\delta(\text{H})$ | $\delta(\text{C})$  | $\delta(\text{H})$ | $\delta(\text{C})$  | $\delta(\text{H})$ | $\delta(\text{C})$  |
| 1                   | -                  | 170.6               | -                  | 169.9               | -                  | 170.3               |
| 2                   | 11.01              | n.o.                | 10.68              | n.o.                | 11.05              | n.o.                |
| 3                   | -                  | 156.2               | -                  | 155.8               | -                  | 155.4               |
| 4                   | -                  | -290.8 <sup>a</sup> | -                  | -291.4 <sup>a</sup> | -                  | -285.5 <sup>a</sup> |
| 5                   | 3.82               | 46.4                | 3.93               | 46.6                | 4.03               | 45.5                |
|                     |                    |                     | 3.86               |                     | 3.55               |                     |
| 6                   | 3.82               | 33.9                | 3.78               | 34.0                | 3.48               | 36.2                |
|                     | 3.15               |                     | 3.42               |                     | 3.34               |                     |
| 7                   | -                  | -53.7 <sup>a</sup>  | -                  | -50.6 <sup>a</sup>  | -                  | -58.2 <sup>a</sup>  |
| 8                   | -                  | 163.1               | -                  | 162.9               | -                  | 165.0               |
| 8a                  | -                  | 68.0                | -                  | 68.3                | -                  | 68.9                |
| 1'                  | -                  | 128.3               | -                  | 128.2               | -                  | 125.3               |
| 2'                  | -                  | 141.7               | -                  | 142.1               | -                  | 138.8               |
| 3'                  | 7.10               | 117.9               | 7.12               | 117.7               | 7.19               | 118.9               |
| 4'                  | 7.19               | 128.7               | 7.22               | 128.9               | 7.23               | 130.8               |
| 5'                  | 6.86               | 119.7               | 6.93               | 120.1               | 6.82               | 119.4               |
| 6'                  | 7.10               | 129.3               | 7.22               | 129.4               | 7.25               | 131.6               |
| 2'                  | 7.15               | -295.9 <sup>a</sup> | 7.37               | -295.6 <sup>a</sup> | 8.85               | -292.2 <sup>a</sup> |
|                     |                    | 90.3 <sup>b</sup>   |                    | 90.4 <sup>b</sup>   |                    | 87.2 <sup>b</sup>   |
| 1'(R <sup>1</sup> ) | -                  | 143.6               | -                  | 143.5               | -                  | 142.8               |
| 2'(R <sup>1</sup> ) | 7.02               | 118.6               | 7.02               | 119.1               | 7.01               | 118.9               |
| 3'(R <sup>1</sup> ) | 7.19               | 128.7               | 7.21               | 128.7               | 7.22               | 128.9               |
| 4'(R <sup>1</sup> ) | 6.83               | 120.3               | 6.83               | 120.5               | 6.89               | 120.9               |
| 1'(R <sup>2</sup> ) | 1.94               | 32.7                | 3.26               | 38.5                | -                  | 137.3               |
|                     |                    |                     | 3.36               |                     |                    |                     |
| 2'(R <sup>2</sup> ) | 1.15               | 24.7                | -                  | 133.8               | 7.39               | 126.5               |
|                     | 0.98               |                     |                    |                     |                    |                     |
| 3'(R <sup>2</sup> ) | 1.15               | 21.7                | 7.02               | 131.2               | 7.42               | 128.9               |
| 4'(R <sup>2</sup> ) | 0.74               | 13.7                | 7.20               | 128.3               | 7.42               | 130.0               |
| 5'(R <sup>2</sup> ) | -                  | -                   | 7.22               | 127.1               | -                  | -                   |

<sup>a</sup>  $\delta(^{15}\text{N})$ ; <sup>b</sup>  $^1J(^{15}\text{N}, ^1\text{H})$ ; n.o. = not observed

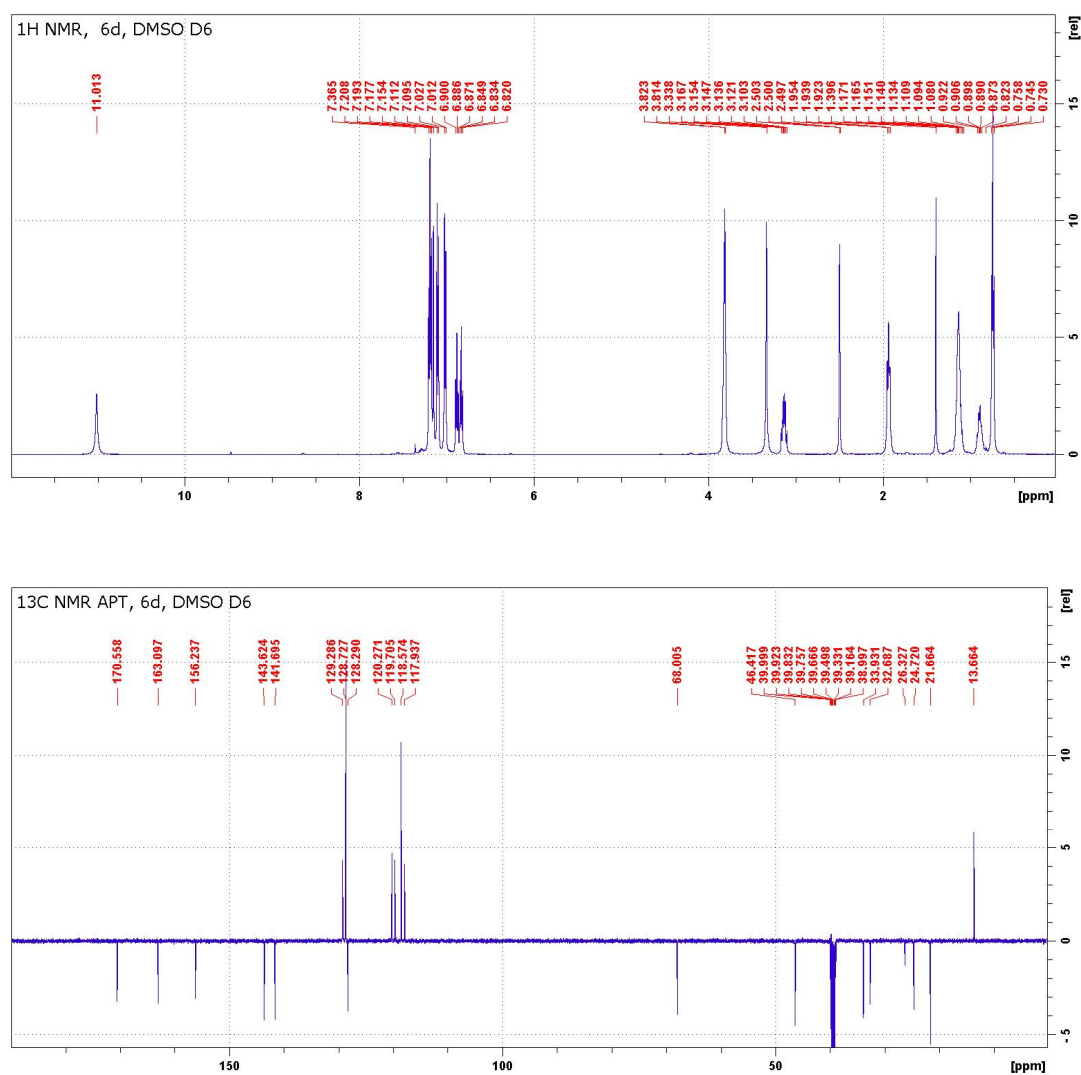

**Figure S19:**  $^1\text{H}$  and  $^{13}\text{C}$  NMR spectra of compound **6d**.

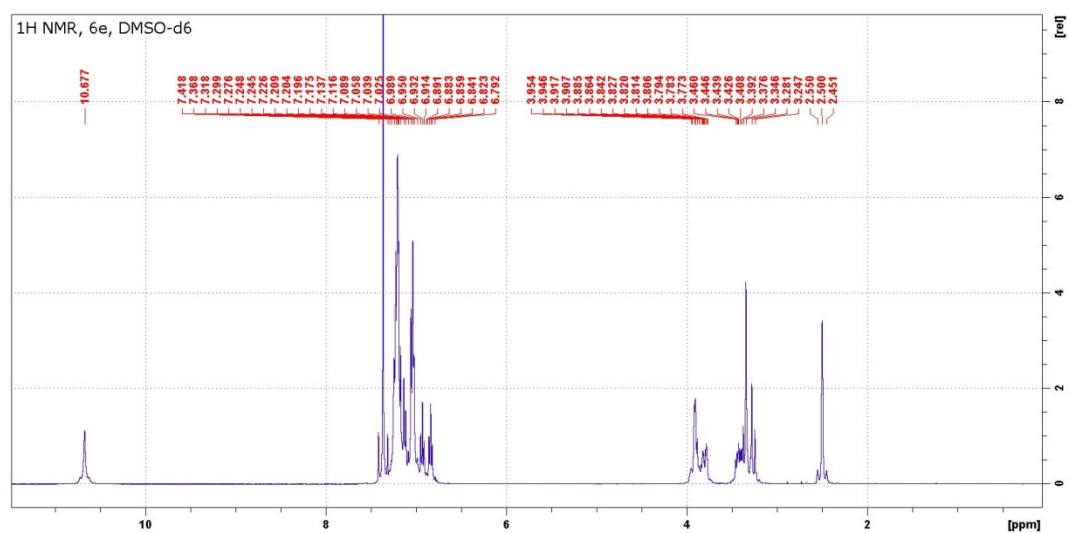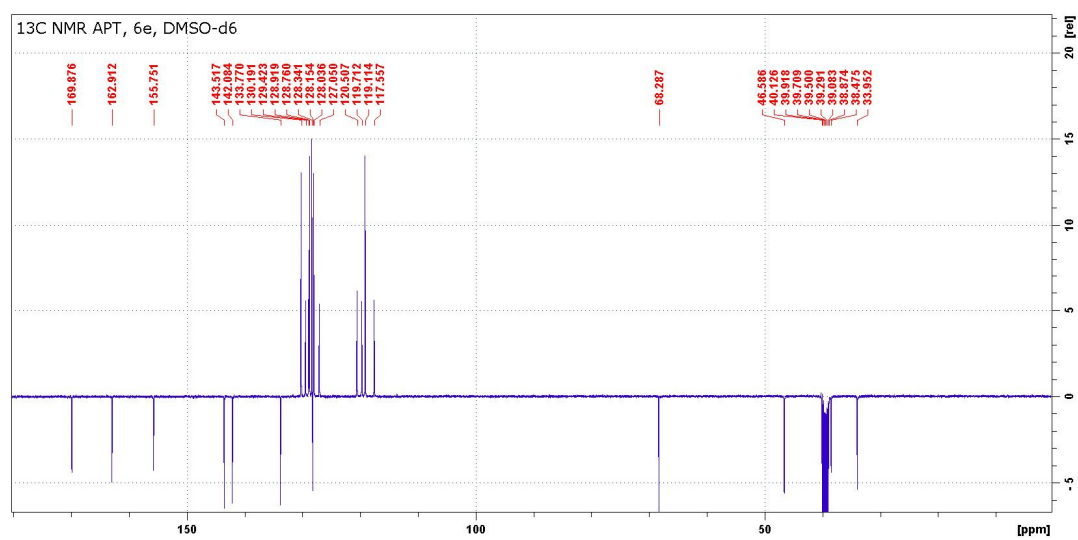

**Figure S20:** <sup>1</sup>H and <sup>13</sup>C NMR spectra of compound **6e**.

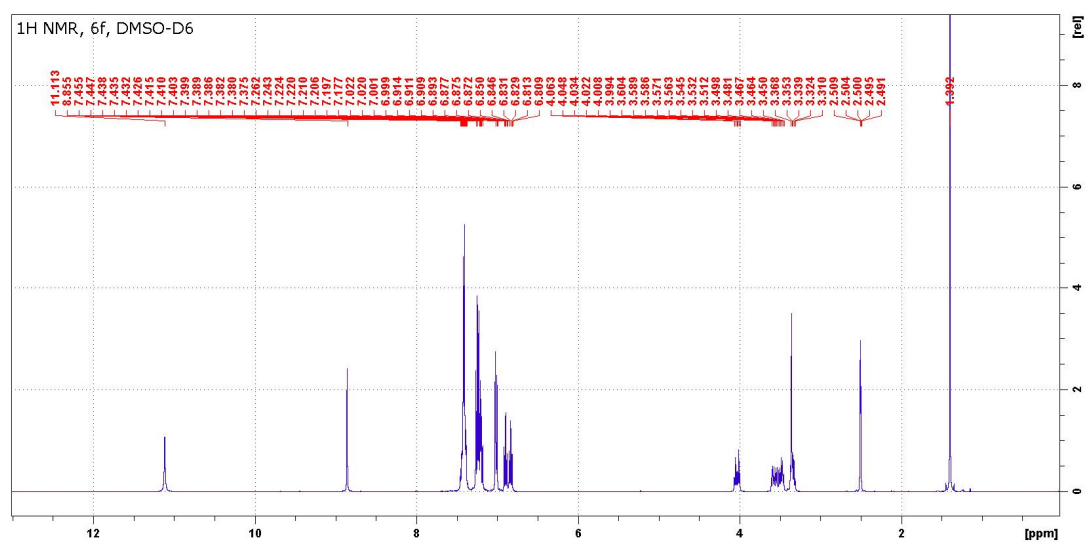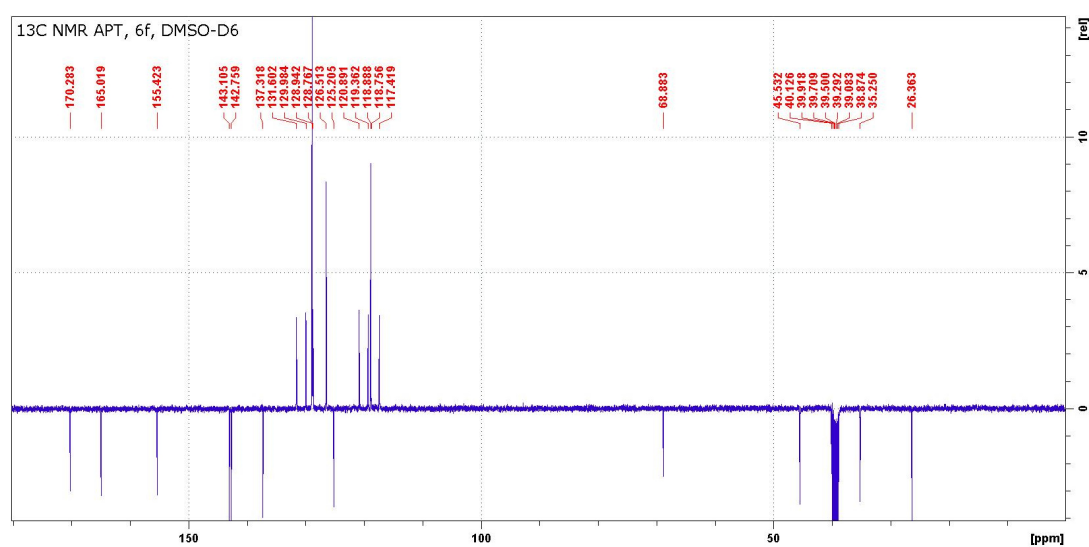

**Figure S21:** <sup>1</sup>H and <sup>13</sup>C NMR spectra of compound **6f**.

**Table S6:**  $^1\text{H}$ ,  $^{13}\text{C}$  and  $^{15}\text{N}$  chemical shifts and  $^1J(^{15}\text{N}, ^1\text{H})$  coupling constants of compounds **7** in DMSO- $d_6$  or in  $\text{CDCl}_3$ .

| Position            | 7a                 |                    | 7b                 |                    | 7c <sup>a</sup>    |                        | 7d <sup>a</sup>    |                        | 7e                 |                    |
|---------------------|--------------------|--------------------|--------------------|--------------------|--------------------|------------------------|--------------------|------------------------|--------------------|--------------------|
|                     | $\delta(\text{H})$ | $\delta(\text{C})$ | $\delta(\text{H})$ | $\delta(\text{C})$ | $\delta(\text{H})$ | $\delta(\text{C})$     | $\delta(\text{H})$ | $\delta(\text{C})$     | $\delta(\text{H})$ | $\delta(\text{C})$ |
| 1                   | -                  |                    | -                  | -                  | -                  | -62.7 <sup>b</sup>     | -                  | -54.1 <sup>b</sup>     | -                  | -                  |
| 2                   | 3.94               | n.o.               | 3.66               | 48.6               | 4.70               | 50.5                   | 4.21               | 50.4                   | 3.66               | 48.5               |
|                     |                    |                    |                    |                    | 2.83               |                        | 3.69               | -                      |                    |                    |
| 3                   | 3.80               | 40.1               | 3.61               | 40.4               | 4.27               | 39.7                   | 3.48               | 40.1                   | 3.74               | 40.4               |
|                     | 3.49               |                    | 2.74               |                    | 4.00               |                        | 2.77               | -                      | 2.74               |                    |
| 4                   | -                  |                    | -                  | -                  | -                  | -288.5 <sup>b</sup>    | -                  | -296.1 <sup>b</sup>    | -                  | -                  |
| C=O                 | -                  | 159.9              | -                  | 160.3              | -                  | 159.7                  | -                  | 160.7                  | -                  | 160.3              |
| NH <sub>2</sub>     | 6.12               | -                  | 6.22               | -                  | 4.53               | -300.9 <sup>b, c</sup> | 5.21               | -301.9 <sup>b, d</sup> | 6.24               | -                  |
| 4a                  | -                  | n.o.               | -                  | 69.2               | -                  | 71.3                   | -                  | 68.8                   | -                  | 69.2               |
| 5                   | -                  | 168.5              | -                  | 167.8              | -                  | 167.6                  | -                  | 171.5                  | -                  | 167.7              |
| 6                   | -                  |                    | -                  | -                  | -                  | -252.1 <sup>b</sup>    | -                  | -234.8 <sup>b</sup>    | -                  | -                  |
| 6a                  | -                  | 139.3              | -                  | 139.6              | -                  | 138.2                  | -                  | 137.5                  | -                  | 138.4              |
| 7                   | 7.20               | 114.8              | 7.20               | 115.1              | 7.01               | 114.4                  | 6.42               | 116.4                  | 6.24               | 115.9              |
| 8                   | 7.51               | 131.7              | 7.53               | 131.9              | 7.33               | 131.4                  | 7.27               | 131.4                  | 7.32               | 131.5              |
| 9                   | 7.13               | 122.8              | 7.20               | 123.0              | 6.98               | 124.1                  | 7.17               | 124.2                  | 7.19               | 123.0              |
| 10                  | 7.74               | 125.2              | 7.75               | 125.9              | 7.51               | 126.1                  | 7.96               | 126.2                  | 7.84               | 127.0              |
| 10a                 | -                  | 124.6              | -                  | 122.9              | -                  | 124.6                  | -                  | 123.1                  | -                  | 122.5              |
| 10b                 | -                  | 162.5              | -                  | 161.1              | -                  | 161.1                  | -                  | 161.3                  | -                  | 161.4              |
| 1'(R <sup>1</sup> ) | 3.31               | 30.3               | 3.35               | 30.7               | 3.59               | 30.8                   | -                  | 139.2                  | -                  | 140.3              |
| 2'(R <sup>1</sup> ) | -                  | -                  | -                  | -                  | -                  | -                      | 7.29               | 129.2                  | 7.25               | 128.3              |
|                     |                    |                    |                    |                    |                    |                        | 7.19               | 128.2                  |                    |                    |
| 3'(R <sup>1</sup> ) | -                  | -                  | -                  | -                  | -                  | -                      | 7.56               | 130.1                  | 7.52               | 130.1              |
| 4'(R <sup>1</sup> ) | -                  | -                  | -                  | -                  | -                  | -                      | 7.50               | 129.0                  | 7.43               | 128.5              |
| 1'(R <sup>2</sup> ) | 1.58               | 30.3               | 2.60,              | 39.7               | -                  | 137.7                  | 3.19               | 34.8                   | 3.05               | 39.8               |
|                     |                    |                    | 2.32               |                    |                    |                        | 1.95               | -                      | 2.99               |                    |
| 2'(R <sup>2</sup> ) | 1.19               | 25.2               | -                  | 135.4              | 7.20               | 126.3                  | 1.36               | 25.2                   | -                  | 135.3              |
|                     | 0.85               |                    |                    |                    |                    |                        | 1.06               | -                      |                    |                    |
| 3'(R <sup>2</sup> ) | 1.03               | 21.7               | 6.91               | 129.8              | 7.20               | 129.4                  | 1.21               | 22.1                   | 6.99               | 129.5              |
| 4'(R <sup>2</sup> ) | 0.66               | 13.7               | 7.20               | 127.5              | 7.20               | 129.1                  | 0.81               | 13.7                   | 7.20               | 127.6              |
| 5(R <sup>2</sup> )  | -                  | -                  | 7.20               | 129.8              | -                  | -                      | .                  | -                      | 7.20               | 129.8              |

<sup>a</sup> in  $\text{CDCl}_3$ ; <sup>b</sup>  $\delta(^{15}\text{N})$ ; <sup>c</sup>  $^1J(^{15}\text{N}, ^1\text{H}) = 86.4 \text{ Hz}$ ; <sup>d</sup>  $^1J(^{15}\text{N}, ^1\text{H}) = 83.6 \text{ Hz}$ ; n.o. = not observed

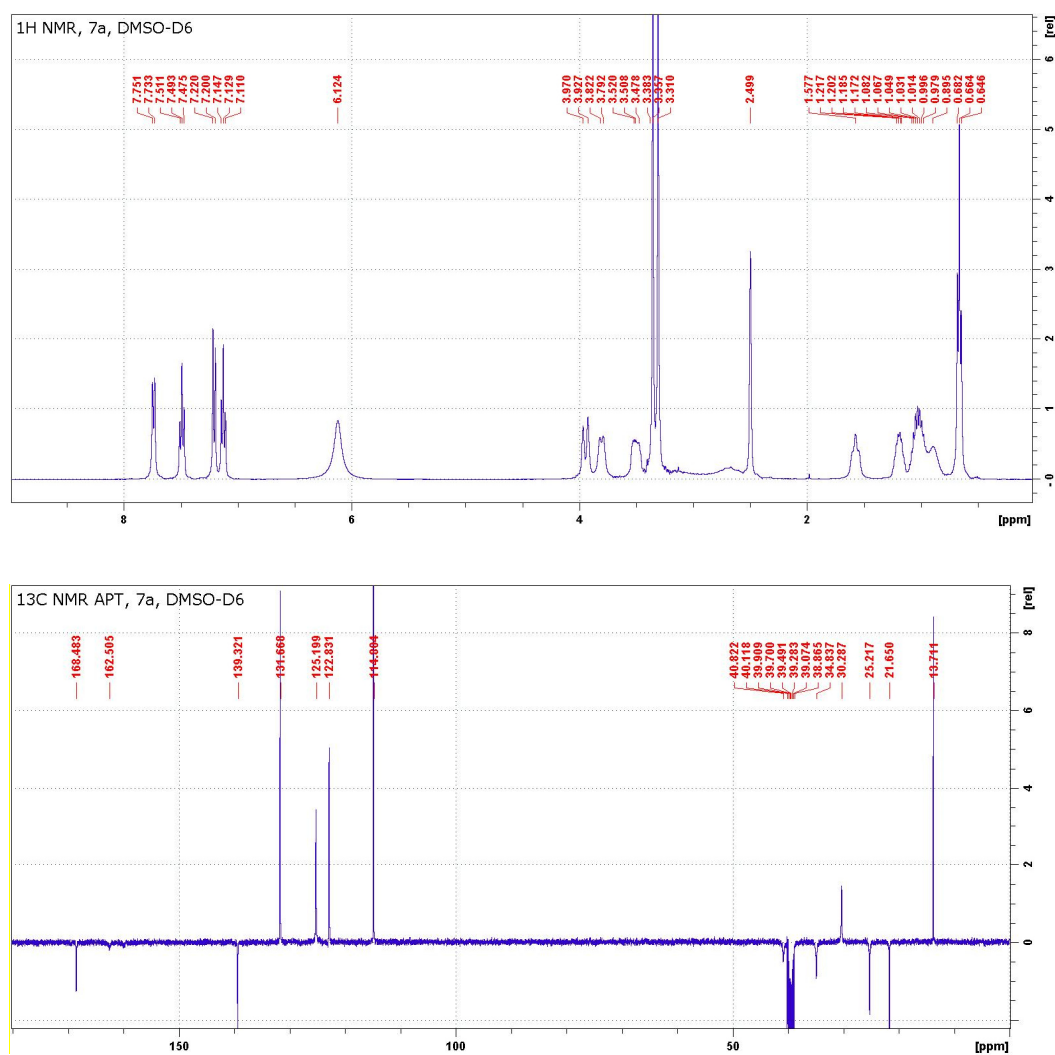

Figure S22:  $^1\text{H}$  and  $^{13}\text{C}$  NMR spectra of compound 7a.



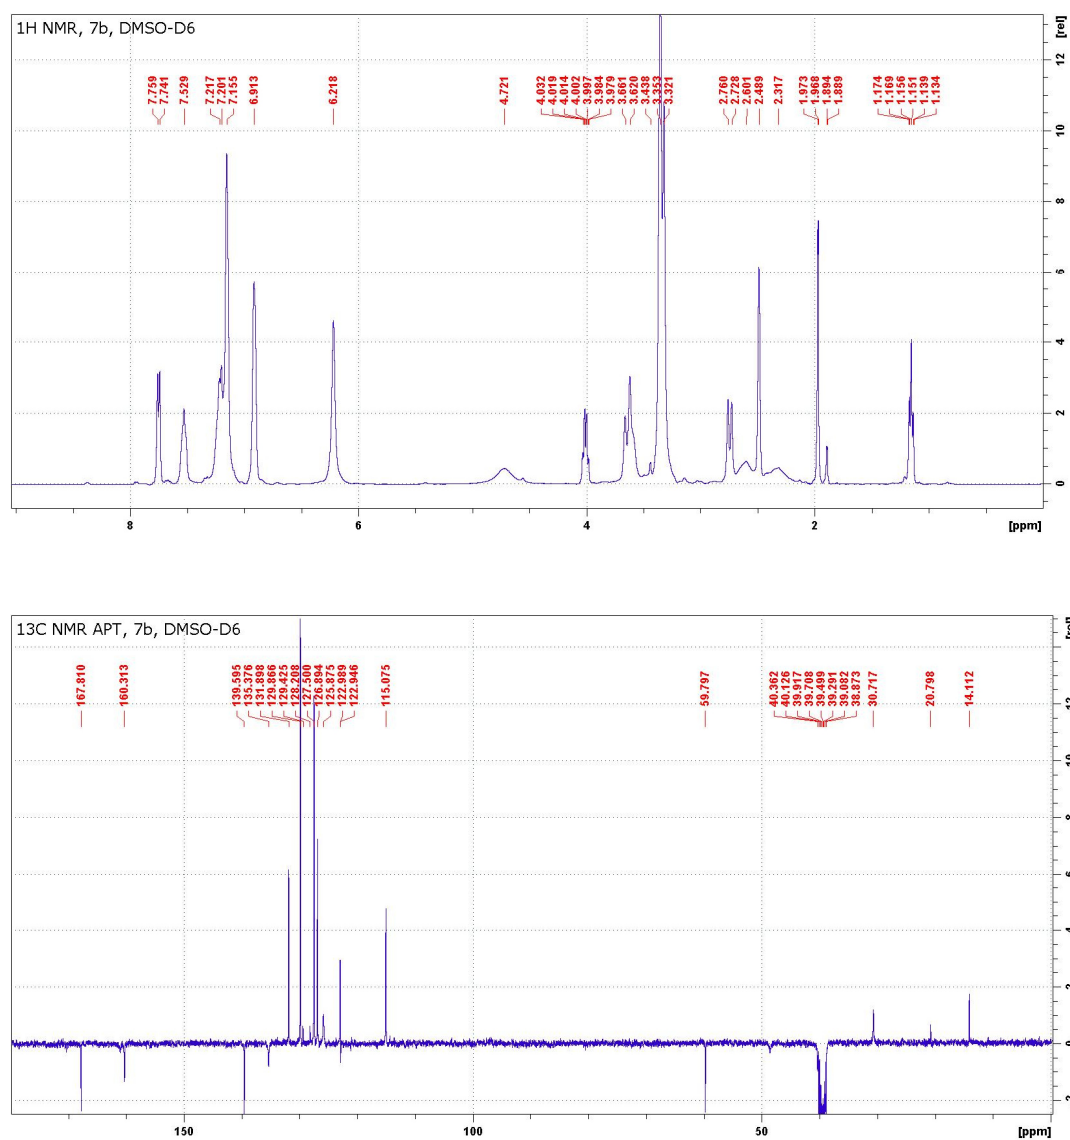

**Figure S23:** <sup>1</sup>H and <sup>13</sup>C NMR spectra of compound **7b** (contains ethanol).

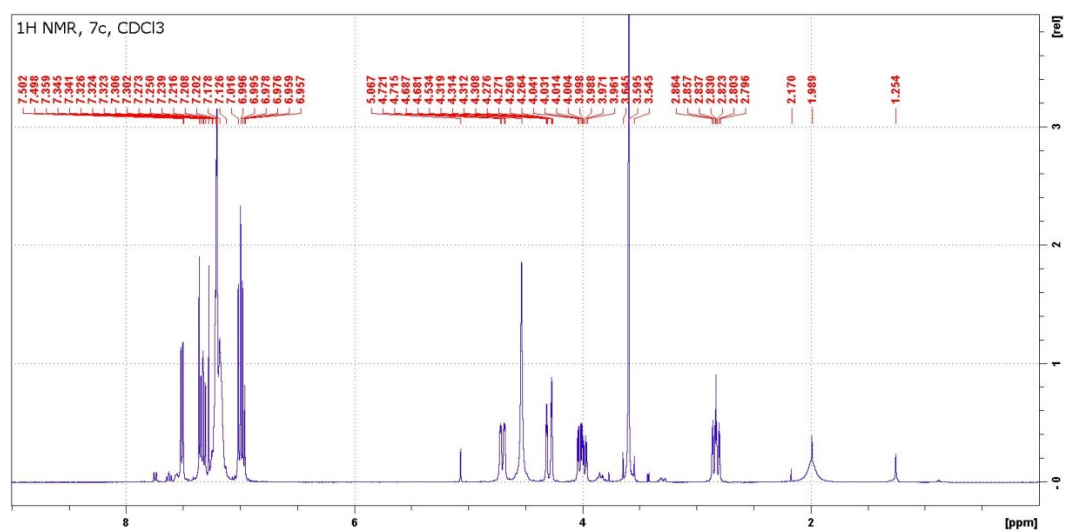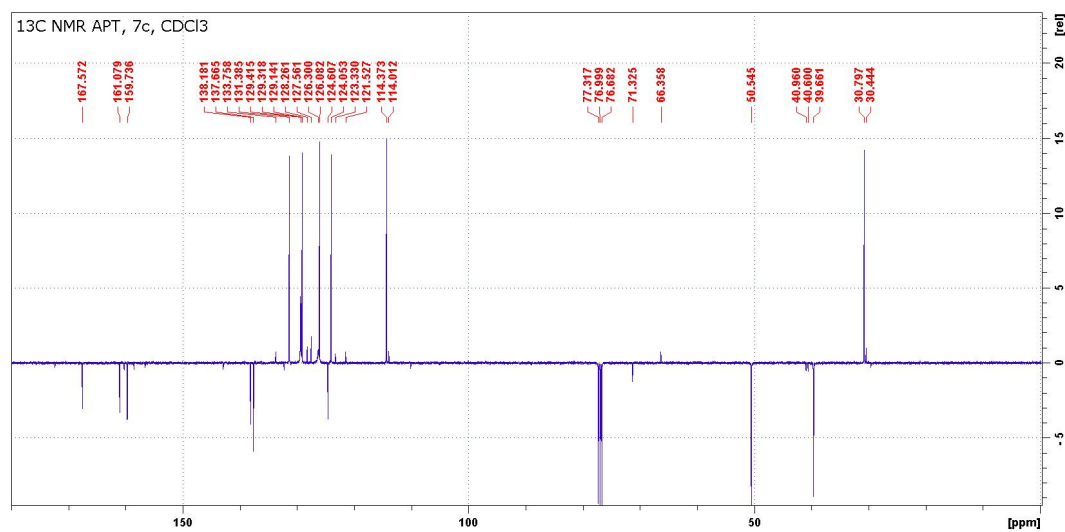

**Figure S24:** <sup>1</sup>H and <sup>13</sup>C NMR spectra of compound 7c.

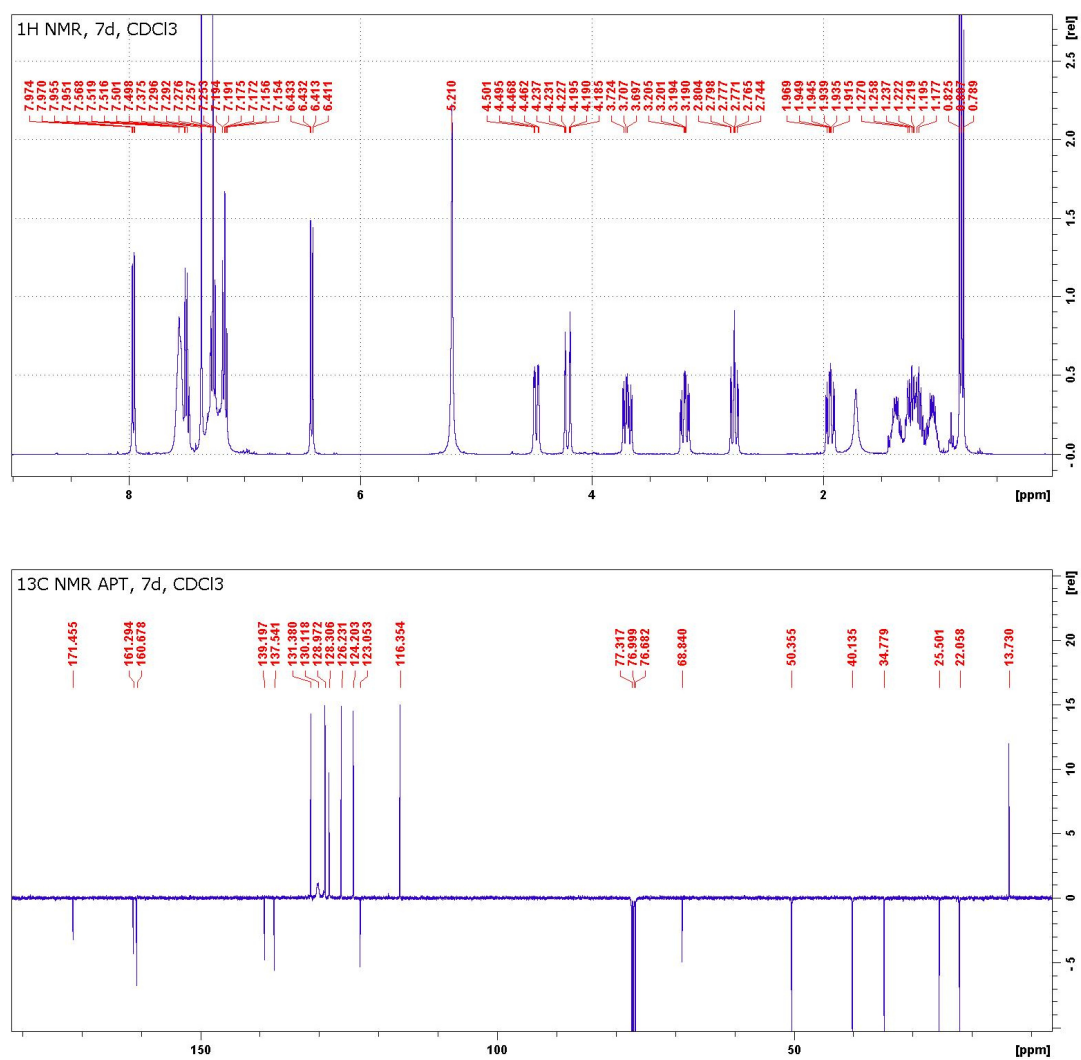

**Figure S25:** <sup>1</sup>H and <sup>13</sup>C NMR spectra of compound **7d**.

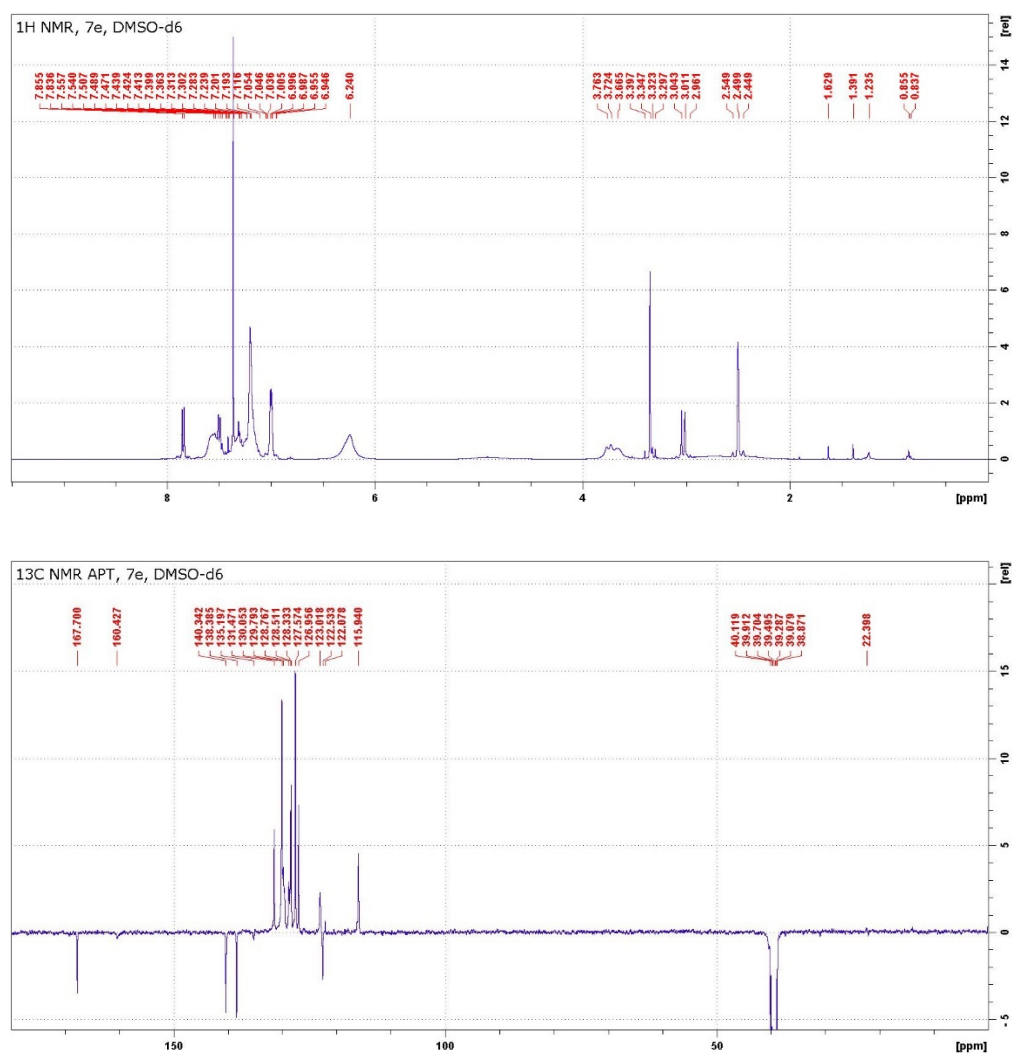

**Figure S26:** <sup>1</sup>H and <sup>13</sup>C NMR spectra of compound **7e**.

**Comment:** Signals of C(4a) in DMSO-*d*<sub>6</sub> are very broad and they are visible after application of line broadening (lb = 10-20z) as very broad singlets while in CDCl<sub>3</sub> solutions, these resonances (compounds **7c** and **7d**) are easily detectable.

**Table S7:**  $^1\text{H}$ ,  $^{13}\text{C}$  and  $^{15}\text{N}$  chemical shifts and  $^1J(^{15}\text{N}, ^1\text{H})$  coupling constants of compound **8f** in DMSO- $d_6$ .

| Position  | 8f                 |                       | Position            | 8f                 |                       |
|-----------|--------------------|-----------------------|---------------------|--------------------|-----------------------|
|           | $\delta(\text{H})$ | $\delta(\text{C})$    |                     | $\delta(\text{H})$ | $\delta(\text{C})$    |
| <b>1</b>  | -                  | -284.5 <sup>a</sup>   | 11-NH               | 8.68               | -292.2 <sup>a,d</sup> |
| <b>2</b>  | -                  | 158.8                 | 12                  | 7.29               | 114.9                 |
| <b>3</b>  | 11.03              | -235.5 <sup>a,b</sup> | 13                  | 7.32               | 131.9                 |
| <b>4</b>  | -                  | 172.9                 | 14                  | 6.83               | 118.1                 |
| <b>5</b>  | 5.22               | 64.3                  | 15                  | 7.57               | 128.9                 |
| <b>6</b>  | 3.38               | 36.6                  | 1'(R <sup>1</sup> ) | -                  | 141.5                 |
|           | 3.31               | -                     | 2'(R <sup>1</sup> ) | 7.15               | 119.4                 |
| <b>7</b>  | 3.77               | 39.6                  | 3'(R <sup>1</sup> ) | 7.30               | 129.4                 |
|           | 2.78               | -                     | 4'(R <sup>1</sup> ) | 6.97               | 121.7                 |
| <b>8</b>  | 9.44               | -269.0 <sup>a,c</sup> | 1'(R <sup>2</sup> ) | -                  | 133.8                 |
| <b>9</b>  | -                  | 169.1                 | 2'(R <sup>2</sup> ) | 7.26               | 127.6                 |
| <b>10</b> | -                  | 119.0                 | 3'(R <sup>2</sup> ) | 7.36               | 129.1                 |
| <b>11</b> | -                  | 144.0                 | 4'(R <sup>2</sup> ) | 7.36               | 128.8                 |

<sup>a</sup>  $\delta(^{15}\text{N})$ ; <sup>b</sup>  $^1J(^{15}\text{N}, ^1\text{H}) = 94.6 \text{ Hz}$ ; <sup>c</sup>  $^1J(^{15}\text{N}, ^1\text{H}) = 91.5 \text{ Hz}$ ; <sup>d</sup>  $^1J(^{15}\text{N}, ^1\text{H}) = 89.5 \text{ Hz}$

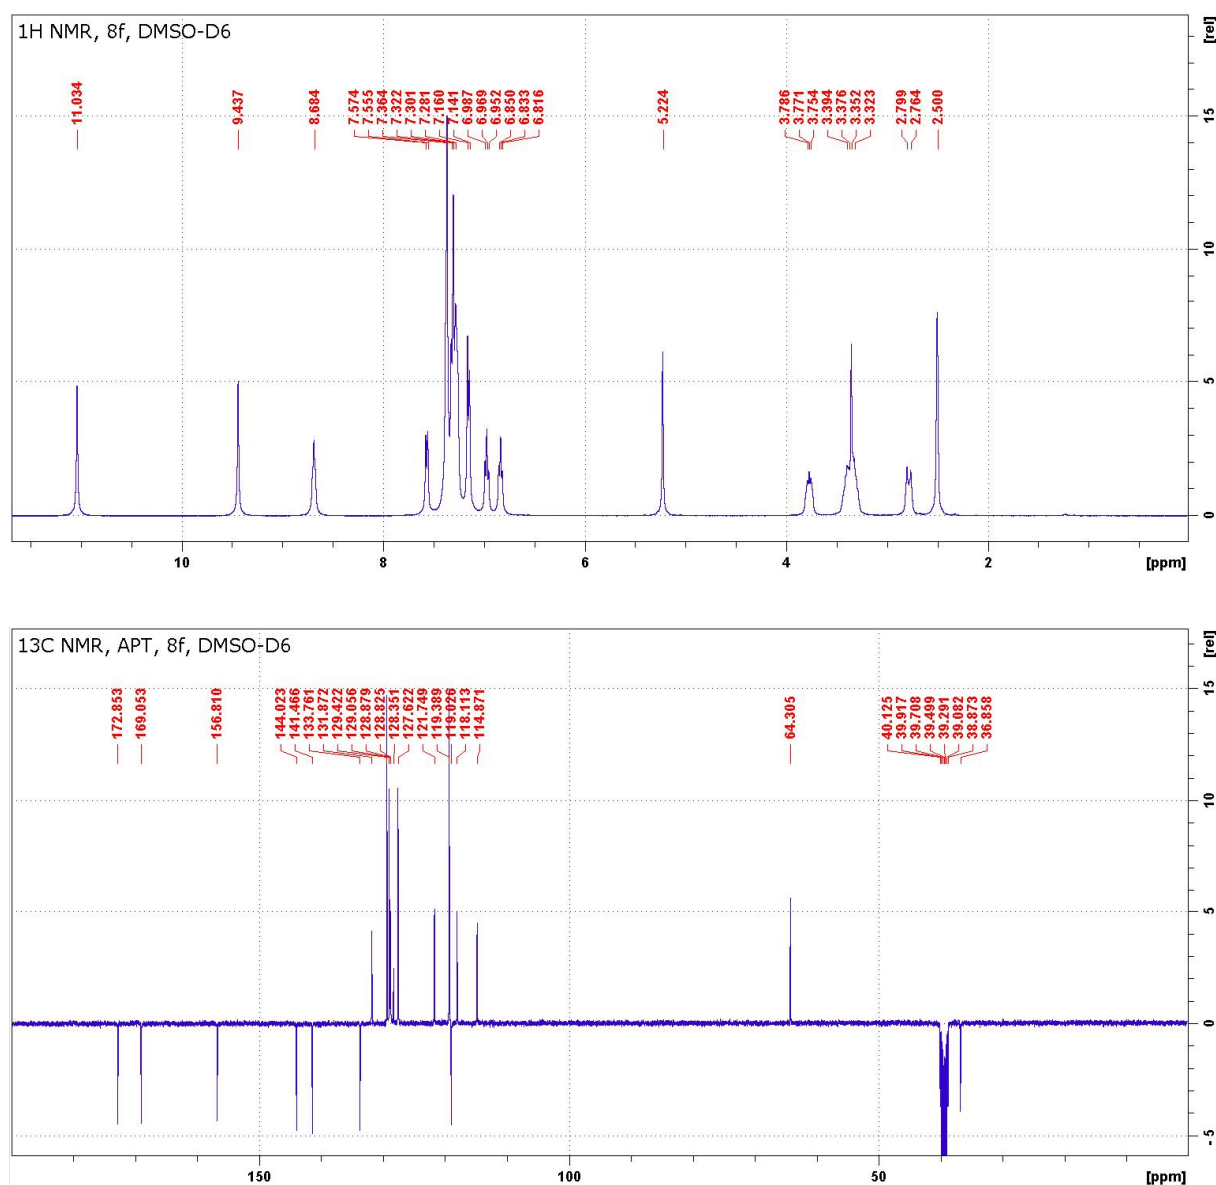

**Figure S27:** <sup>1</sup>H and <sup>13</sup>C NMR spectra of compound **8f**.

## Crystal data and structure refinement of compounds **5d**, **7a**, **7b**

### X-ray crystallography-experimental details

Full-sets of diffraction data for **5d** (yellow) and **7a** (colourless) were collected at 150(2)K with a Bruker D8-Venture diffractometer equipped with Cu (Cu/K $\alpha$  radiation;  $\lambda$  = 1.54178 Å) or Mo (Mo/K $\alpha$  radiation;  $\lambda$  = 0.71073 Å) microfocus X-ray (I $\mu$ S) sources, Photon CMOS detector and Oxford Cryosystems cooling device was used for data collection. The frames were integrated with the Bruker SAINT software package using a narrow-frame algorithm. Data were corrected for absorption effects using the Multi-Scan method (SADABS). Obtained data were treated by XT-version 2018/1 and SHELXL-2017/1 software implemented in APEX3 v2016.5-0 (Bruker AXS) system.<sup>1</sup> Hydrogen atoms were mostly localized on a difference Fourier map, however to ensure uniformity of treatment of crystal, all hydrogen atoms were recalculated into idealized positions (riding model) and assigned temperature factors  $H_{iso}(H) = 1.2 U_{eq}$  (pivot atom) or of  $1.5 U_{eq}$  (methyl). H atoms in methyl, methylene and hydrogen atoms in aromatic rings were placed with C-H distances of 0.98, 0.97 and 0.95 Å, respectively, and hydrogen atom of N-H or O-H (H3 fixed in appropriate position) group refined freely. Crystallographic data for structural analysis have been deposited with the Cambridge Crystallographic Data Centre, CCDC nos. 2047078, 2047079 and 2055718, respectively. Copies of this information may be obtained free of charge from The Director, CCDC, 12 Union Road, Cambridge CB2 1EY, UK (fax: +44-1223-336033; e-mail: deposit@ccdc.cam.ac.uk or www: <http://www.ccdc.cam.ac.uk>).

[1] G. M. Sheldrick, Crystal structure refinement with SHELXL; Acta Cryst. (2015). C71, 3-8 <https://doi.org/10.1107/S2053229614024218>

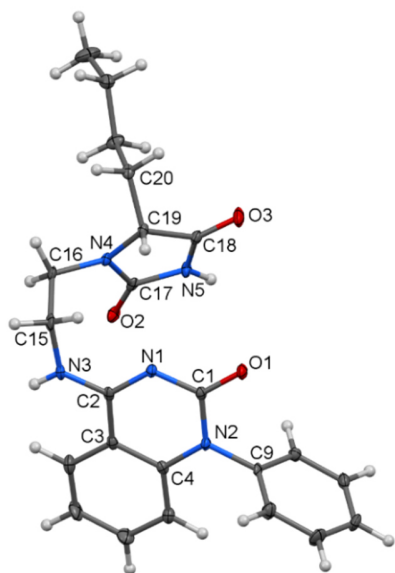

**Figure S28:** Molecular structure of **5d** – ORTEP view, 40% probability level.

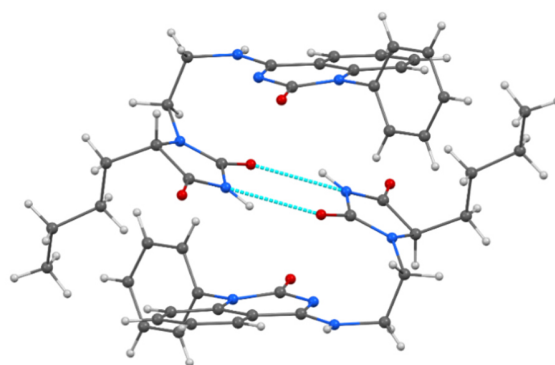

**Figure S29:** Molecular structure of **5d** – H-bonding representation.

**Table S8:** Experimental details for **5d**.

|                                                                                                                                                                                                                                               |                                                                                                |
|-----------------------------------------------------------------------------------------------------------------------------------------------------------------------------------------------------------------------------------------------|------------------------------------------------------------------------------------------------|
| Crystal data                                                                                                                                                                                                                                  |                                                                                                |
| Chemical formula                                                                                                                                                                                                                              | C <sub>23</sub> H <sub>25</sub> N <sub>5</sub> O <sub>3</sub>                                  |
| $M_r$                                                                                                                                                                                                                                         | 419.48                                                                                         |
| Crystal system, space group                                                                                                                                                                                                                   | Monoclinic, $P2_1/c$                                                                           |
| Temperature (K)                                                                                                                                                                                                                               | 150                                                                                            |
| $a, b, c$ (Å)                                                                                                                                                                                                                                 | 15.5947 (11), 9.8133 (7), 14.8551 (12)                                                         |
| $\beta$ (°)                                                                                                                                                                                                                                   | 114.200 (2)                                                                                    |
| $V$ (Å <sup>3</sup> )                                                                                                                                                                                                                         | 2073.6 (3)                                                                                     |
| $Z$                                                                                                                                                                                                                                           | 4                                                                                              |
| Radiation type                                                                                                                                                                                                                                | Mo $K\alpha$                                                                                   |
| $\mu$ (mm <sup>-1</sup> )                                                                                                                                                                                                                     | 0.09                                                                                           |
| Crystal size (mm)                                                                                                                                                                                                                             | 0.59 × 0.31 × 0.06                                                                             |
| Data collection                                                                                                                                                                                                                               |                                                                                                |
| Diffractometer                                                                                                                                                                                                                                | Bruker D8 - Venture                                                                            |
| Absorption correction                                                                                                                                                                                                                         | Multi-scan<br><i>SADABS2016/2</i> - Bruker AXS area detector scaling and absorption correction |
| $T_{\min}, T_{\max}$                                                                                                                                                                                                                          | 0.640, 0.746                                                                                   |
| No. of measured, independent and observed [ $I > 2\sigma(I)$ ] reflections                                                                                                                                                                    | 45891, 4767, 3859                                                                              |
| $R_{\text{int}}$                                                                                                                                                                                                                              | 0.101                                                                                          |
| $(\sin \theta/\lambda)_{\max}$ (Å <sup>-1</sup> )                                                                                                                                                                                             | 0.651                                                                                          |
| Refinement                                                                                                                                                                                                                                    |                                                                                                |
| $R[F^2 > 2\sigma(F^2)], wR(F^2), S$                                                                                                                                                                                                           | 0.083, 0.163, 1.25                                                                             |
| No. of reflections                                                                                                                                                                                                                            | 4767                                                                                           |
| No. of parameters                                                                                                                                                                                                                             | 285                                                                                            |
| No. of restraints                                                                                                                                                                                                                             | 243                                                                                            |
| H-atom treatment                                                                                                                                                                                                                              | H atoms treated by a mixture of independent and constrained refinement                         |
| $\Delta\rho_{\max}, \Delta\rho_{\min}$ (e Å <sup>-3</sup> )                                                                                                                                                                                   | 0.37, -0.41                                                                                    |
| Computer programs: Bruker Instrument Service vV6.2.3, <i>APEX3</i> v2016.5-0 (Bruker AXS), <i>SAINT</i> V8.37A (Bruker AXS Inc., 2015), <i>XT</i> , <i>VERSION</i> 2014/5, <i>SHELXL2014/7</i> (Sheldrick, 2014), <i>PLATON</i> (Spek, 2009). |                                                                                                |



**Table S9:** Geometric parameters (Å, °) for **5d**.

|           |             |               |           |
|-----------|-------------|---------------|-----------|
| O1-C1     | 1.232 (3)   | C10-C11       | 1.382 (4) |
| N1-C2     | 1.328 (3)   | C10-H10       | 0.9500    |
| N1-C1     | 1.368 (3)   | C11-C12       | 1.386 (4) |
| C1-N2     | 1.398 (3)   | C11-H11       | 0.9500    |
| N2-C4     | 1.395 (3)   | C12-C13       | 1.379 (4) |
| N2-C9     | 1.446 (3)   | C12-H12       | 0.9500    |
| O2-C17    | 1.226 (3)   | C13-C14       | 1.385 (4) |
| C2-N3     | 1.334 (3)   | C13-H13       | 0.9500    |
| C2-C3     | 1.458 (3)   | C14-H14       | 0.9500    |
| O3-C18    | 1.209 (3)   | C15-C16       | 1.520 (4) |
| N3-C15    | 1.459 (3)   | C15-H15A      | 0.9900    |
| N3-H3     | 0.80 (3)    | C15-H15B      | 0.9900    |
| C3-C5     | 1.399 (3)   | C16-H16A      | 0.9900    |
| C3-C4     | 1.401 (3)   | C16-H16B      | 0.9900    |
| C4-C8     | 1.398 (4)   | C18-C19       | 1.528 (3) |
| N4-C17    | 1.347 (3)   | C19-C20       | 1.531 (3) |
| N4-C16    | 1.456 (3)   | C19-H19       | 1.0000    |
| N4-C19    | 1.462 (3)   | C20-C21       | 1.512 (4) |
| C5-C6     | 1.375 (4)   | C20-H20A      | 0.9900    |
| C5-H5     | 0.9500      | C20-H20B      | 0.9900    |
| N5-C18    | 1.366 (3)   | C21-C22       | 1.524 (4) |
| N5-C17    | 1.391 (3)   | C21-H21A      | 0.9900    |
| N5-H5A    | 0.8800      | C21-H21B      | 0.9900    |
| C6-C7     | 1.390 (4)   | C22-C23       | 1.511 (4) |
| C6-H6     | 0.9500      | C22-H22A      | 0.9900    |
| C7-C8     | 1.380 (4)   | C22-H22B      | 0.9900    |
| C7-H7     | 0.9500      | C23-H23A      | 0.9800    |
| C8-H8     | 0.9500      | C23-H23B      | 0.9800    |
| C9-C10    | 1.381 (4)   | C23-H23C      | 0.9800    |
| C9-C14    | 1.388 (3)   |               |           |
| C2-N1-C1  | 120.6 (2)   | C13-C14-C9    | 119.2 (2) |
| O1-C1-N1  | 122.0 (2)   | C13-C14-H14   | 120.4     |
| O1-C1-N2  | 118.9 (2)   | C9-C14-H14    | 120.4     |
| N1-C1-N2  | 119.1 (2)   | N3-C15-C16    | 111.6 (2) |
| C4-N2-C1  | 121.8 (2)   | N3-C15-H15A   | 109.3     |
| C4-N2-C9  | 118.7 (2)   | C16-C15-H15A  | 109.3     |
| C1-N2-C9  | 119.28 (19) | N3-C15-H15B   | 109.3     |
| N1-C2-N3  | 118.9 (2)   | C16-C15-H15B  | 109.3     |
| N1-C2-C3  | 122.4 (2)   | H15A-C15-H15B | 108.0     |
| N3-C2-C3  | 118.7 (2)   | N4-C16-C15    | 113.4 (2) |
| C2-N3-C15 | 125.4 (2)   | N4-C16-H16A   | 108.9     |
| C2-N3-H3  | 119 (2)     | C15-C16-H16A  | 108.9     |
| C15-N3-H3 | 115 (2)     | N4-C16-H16B   | 108.9     |
| C5-C3-C4  | 119.2 (2)   | C15-C16-H16B  | 108.9     |
| C5-C3-C2  | 124.2 (2)   | H16A-C16-H16B | 107.7     |
| C4-C3-C2  | 116.6 (2)   | O2-C17-N4     | 127.7 (2) |

|             |             |               |             |
|-------------|-------------|---------------|-------------|
| N2-C4-C8    | 121.6 (2)   | O2-C17-N5     | 124.4 (2)   |
| N2-C4-C3    | 118.7 (2)   | N4-C17-N5     | 107.9 (2)   |
| C8-C4-C3    | 119.7 (2)   | O3-C18-N5     | 127.4 (2)   |
| C17-N4-C16  | 123.3 (2)   | O3-C18-C19    | 125.9 (2)   |
| C17-N4-C19  | 111.79 (19) | N5-C18-C19    | 106.67 (19) |
| C16-N4-C19  | 121.7 (2)   | N4-C19-C18    | 101.41 (19) |
| C6-C5-C3    | 120.7 (2)   | N4-C19-C20    | 113.99 (19) |
| C6-C5-H5    | 119.7       | C18-C19-C20   | 112.6 (2)   |
| C3-C5-H5    | 119.7       | N4-C19-H19    | 109.5       |
| C18-N5-C17  | 111.8 (2)   | C18-C19-H19   | 109.5       |
| C18-N5-H5A  | 124.1       | C20-C19-H19   | 109.5       |
| C17-N5-H5A  | 124.1       | C21-C20-C19   | 113.5 (2)   |
| C5-C6-C7    | 119.8 (2)   | C21-C20-H20A  | 108.9       |
| C5-C6-H6    | 120.1       | C19-C20-H20A  | 108.9       |
| C7-C6-H6    | 120.1       | C21-C20-H20B  | 108.9       |
| C8-C7-C6    | 120.7 (3)   | C19-C20-H20B  | 108.9       |
| C8-C7-H7    | 119.7       | H20A-C20-H20B | 107.7       |
| C6-C7-H7    | 119.7       | C20-C21-C22   | 114.8 (2)   |
| C7-C8-C4    | 119.8 (2)   | C20-C21-H21A  | 108.6       |
| C7-C8-H8    | 120.1       | C22-C21-H21A  | 108.6       |
| C4-C8-H8    | 120.1       | C20-C21-H21B  | 108.6       |
| C10-C9-C14  | 120.7 (2)   | C22-C21-H21B  | 108.6       |
| C10-C9-N2   | 119.4 (2)   | H21A-C21-H21B | 107.6       |
| C14-C9-N2   | 119.9 (2)   | C23-C22-C21   | 112.6 (2)   |
| C9-C10-C11  | 119.5 (3)   | C23-C22-H22A  | 109.1       |
| C9-C10-H10  | 120.2       | C21-C22-H22A  | 109.1       |
| C11-C10-H10 | 120.2       | C23-C22-H22B  | 109.1       |
| C10-C11-C12 | 120.3 (3)   | C21-C22-H22B  | 109.1       |
| C10-C11-H11 | 119.8       | H22A-C22-H22B | 107.8       |
| C12-C11-H11 | 119.8       | C22-C23-H23A  | 109.5       |
| C13-C12-C11 | 119.8 (2)   | C22-C23-H23B  | 109.5       |
| C13-C12-H12 | 120.1       | H23A-C23-H23B | 109.5       |
| C11-C12-H12 | 120.1       | C22-C23-H23C  | 109.5       |
| C12-C13-C14 | 120.5 (2)   | H23A-C23-H23C | 109.5       |
| C12-C13-H13 | 119.7       | H23B-C23-H23C | 109.5       |
| C14-C13-H13 | 119.7       |               |             |

**Table 10:** Hydrogen-bond geometry (Å, °) for **5d**.

| <i>D</i> —H··· <i>A</i>   | <i>D</i> —H | H··· <i>A</i> | <i>D</i> ··· <i>A</i> | <i>D</i> —H··· <i>A</i> |
|---------------------------|-------------|---------------|-----------------------|-------------------------|
| N3—H3···O1 <sup>i</sup>   | 0.80 (3)    | 2.29 (3)      | 3.080 (3)             | 167 (3)                 |
| N5—H5A···O2 <sup>ii</sup> | 0.88        | 2.07          | 2.858 (3)             | 148                     |

Symmetry codes: (i)  $x, -y+1/2, z-1/2$ ; (ii)  $-x+1, -y+1, -z+1$ .

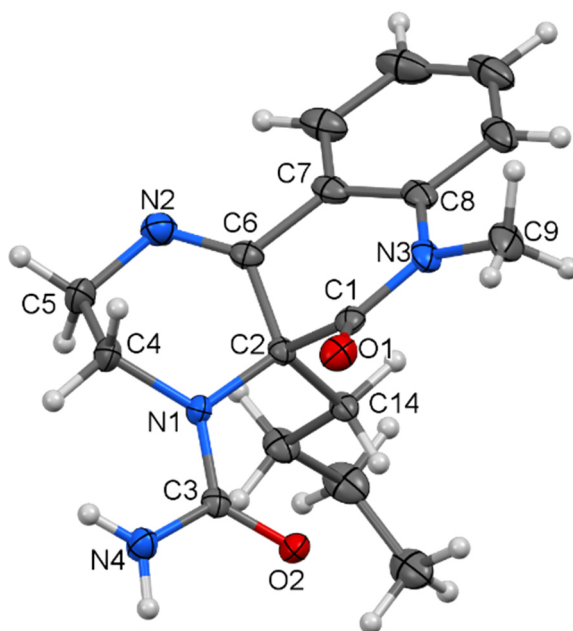

**Figure S30:** Molecular structure of **7a** – ORTEP view, 40% probability level.

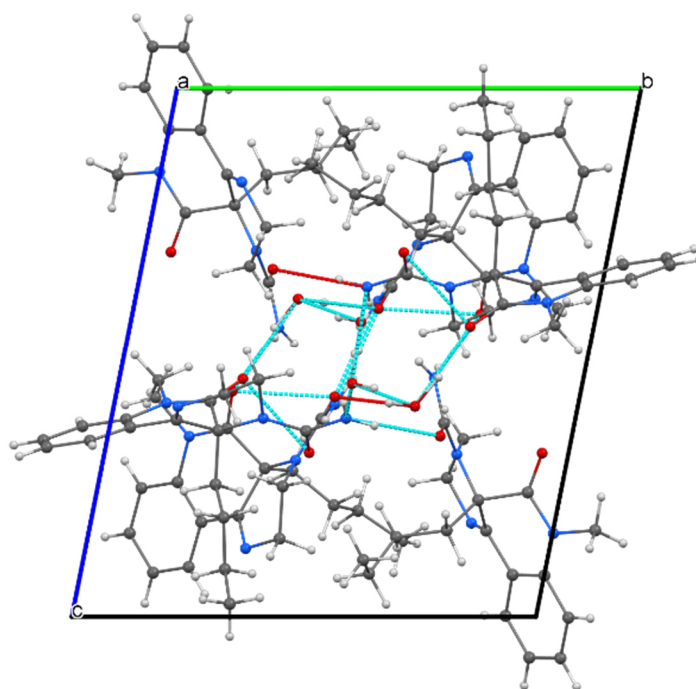

**Figure S31:** Molecular structure of **7a** – H-bonding representation (left) supramolecular architecture, view along *c* axis.

**Table S11:** Experimental details for **7a**.

|                                                                            |                                                                                                |
|----------------------------------------------------------------------------|------------------------------------------------------------------------------------------------|
| Crystal data                                                               |                                                                                                |
| Chemical formula                                                           | C <sub>17</sub> H <sub>22</sub> N <sub>4</sub> O <sub>2</sub> ·0.67(H <sub>2</sub> O)          |
| $M_r$                                                                      | 326.40C                                                                                        |
| Crystal system, space group                                                | Triclinic, <i>P</i> -1                                                                         |
| Temperature (K)                                                            | 150                                                                                            |
| $a, b, c$ (Å)                                                              | 13.0440 (4), 13.4973 (5), 16.1736 (6)                                                          |
| $\alpha, \beta, \gamma$ (°)                                                | 95.036 (2), 110.468 (2), 104.772 (2)                                                           |
| $V$ (Å <sup>3</sup> )                                                      | 2529.88 (16)                                                                                   |
| $Z$                                                                        | 6                                                                                              |
| Radiation type                                                             | Mo $K\alpha$                                                                                   |
| $\mu$ (mm <sup>-1</sup> )                                                  | 0.09                                                                                           |
| Crystal size (mm)                                                          | 0.74 × 0.42 × 0.38                                                                             |
| Data collection                                                            |                                                                                                |
| Diffractometer                                                             | Bruker D8 - Venture                                                                            |
| Absorption correction                                                      | Multi-scan<br><i>SADABS2016/2</i> - Bruker AXS area detector scaling and absorption correction |
| $T_{\min}, T_{\max}$                                                       | 0.684, 0.746                                                                                   |
| No. of measured, independent and observed [ $I > 2\sigma(I)$ ] reflections | 72323, 11662, 9083                                                                             |
| $R_{\text{int}}$                                                           | 0.049                                                                                          |
| $(\sin \theta/\lambda)_{\max}$ (Å <sup>-1</sup> )                          | 0.652                                                                                          |
| Refinement                                                                 |                                                                                                |
| $R[F^2 > 2\sigma(F^2)], wR(F^2), S$                                        | 0.056, 0.148, 1.04                                                                             |
| No. of reflections                                                         | 11662                                                                                          |
| No. of parameters                                                          | 665                                                                                            |
| No. of restraints                                                          | 7                                                                                              |
| H-atom treatment                                                           | H atoms treated by a mixture of independent and constrained refinement                         |
| $\Delta\rho_{\max}, \Delta\rho_{\min}$ (e Å <sup>-3</sup> )                | 1.21, -0.53                                                                                    |

Computer programs: Bruker Instrument Service vV6.2.3, *APEX3* v2016.5-0 (Bruker AXS), *SAINT* V8.37A (Bruker AXS Inc., 2015), *XT, VERSION 2014/5'\_computing\_structure\_refinement 'SHELXL2017/1* (Sheldrick, 2017), *PLATON* (Spek, 2009).

**Table S12:** Geometric parameters (Å, °) for **7a**.

|          |           |           |            |
|----------|-----------|-----------|------------|
| O1-C1    | 1.214 (2) | N3A-C9A   | 1.468 (2)  |
| C1-N3    | 1.379 (2) | O2W-H3    | 0.967 (9)  |
| C1-C2    | 1.543 (2) | O2W-H5    | 0.944 (10) |
| N1-C3    | 1.381 (2) | C4A-C5A   | 1.502 (3)  |
| N1-C2    | 1.460 (2) | C4A-H4AA  | 0.9900     |
| N1-C4    | 1.461 (2) | C4A-H4AC  | 0.9900     |
| O2-C3    | 1.236 (2) | N4A-H4AD  | 0.8800     |
| C2-C6    | 1.524 (3) | N4A-H4AE  | 0.8800     |
| C2-C14   | 1.563 (2) | N3B-C8B   | 1.415 (2)  |
| N2-C6    | 1.264 (2) | N3B-C9B   | 1.467 (2)  |
| N2-C5    | 1.459 (3) | C3B-N4B   | 1.335 (2)  |
| C3-N4    | 1.350 (2) | C5A-H5AA  | 0.9900     |
| N3-C8    | 1.409 (3) | C5A-H5AC  | 0.9900     |
| N3-C9    | 1.463 (3) | N4B-H4BA  | 0.8800     |
| C4-C5    | 1.506 (3) | N4B-H4BB  | 0.8800     |
| C4-H4A   | 0.9900    | C4B-C5B   | 1.507 (3)  |
| C4-H4AB  | 0.9900    | C4B-H4BC  | 0.9900     |
| N1B-C3B  | 1.378 (2) | C4B-H4BD  | 0.9900     |
| N1B-C2B  | 1.461 (2) | C6A-C7A   | 1.475 (3)  |
| N1B-C4B  | 1.461 (2) | C5B-H5BA  | 0.9900     |
| O1B-C1B  | 1.220 (2) | C5B-H5BB  | 0.9900     |
| C1B-N3B  | 1.364 (2) | C7A-C10A  | 1.387 (3)  |
| C1B-C2B  | 1.548 (2) | C7A-C8A   | 1.404 (3)  |
| C1A-O1A  | 1.219 (2) | C6B-C7B   | 1.476 (2)  |
| C1A-N3A  | 1.355 (3) | C8A-C13A  | 1.398 (3)  |
| C1A-C2A  | 1.549 (3) | C7B-C10B  | 1.387 (3)  |
| N1A-C3A  | 1.379 (2) | C7B-C8B   | 1.400 (2)  |
| N1A-C2A  | 1.458 (3) | C9A-H9AA  | 0.9800     |
| N1A-C4A  | 1.468 (3) | C9A-H9AB  | 0.9800     |
| N4-H4'   | 0.85 (3)  | C9A-H9AC  | 0.9800     |
| N4-H4    | 0.87 (3)  | C8B-C13B  | 1.394 (3)  |
| C5-H5A   | 0.9900    | C10A-C11A | 1.386 (3)  |
| C5-H5AB  | 0.9900    | C10A-H10A | 0.9500     |
| C6-C7    | 1.484 (3) | C9B-H9BA  | 0.9800     |
| C7-C10   | 1.391 (3) | C9B-H9BB  | 0.9800     |
| C7-C8    | 1.398 (3) | C9B-H9BC  | 0.9800     |
| C8-C13   | 1.400 (3) | C11A-C12A | 1.381 (3)  |
| C9-H9A   | 0.9800    | C11A-H11A | 0.9500     |
| C9-H9B   | 0.9800    | C10B-C11B | 1.383 (3)  |
| C9-H9C   | 0.9800    | C10B-H10B | 0.9500     |
| N2B-C6B  | 1.267 (2) | C12A-C13A | 1.377 (3)  |
| N2B-C5B  | 1.455 (2) | C12A-H12A | 0.9500     |
| O2B-C3B  | 1.247 (2) | C11B-C12B | 1.376 (3)  |
| C2B-C6B  | 1.527 (2) | C11B-H11B | 0.9500     |
| C2B-C14B | 1.558 (2) | C13A-H13A | 0.9500     |
| C2A-C6A  | 1.532 (2) | C12B-C13B | 1.384 (3)  |

|           |             |               |             |
|-----------|-------------|---------------|-------------|
| C2A-C14A  | 1.559 (3)   | C12B-H12B     | 0.9500      |
| N2A-C6A   | 1.273 (2)   | C14A-C15A     | 1.519 (3)   |
| N2A-C5A   | 1.459 (3)   | C14A-H14C     | 0.9900      |
| O2A-C3A   | 1.229 (2)   | C14A-H14D     | 0.9900      |
| C10-C11   | 1.389 (3)   | C13B-H13B     | 0.9500      |
| C10-H10   | 0.9500      | C15A-C16A     | 1.521 (3)   |
| C11-C12   | 1.380 (4)   | C15A-H15C     | 0.9900      |
| C11-H11   | 0.9500      | C15A-H15D     | 0.9900      |
| C13-C12   | 1.375 (4)   | C14B-C15B     | 1.515 (2)   |
| C13-H13   | 0.9500      | C14B-H14E     | 0.9900      |
| C14-C15   | 1.519 (2)   | C14B-H14F     | 0.9900      |
| C14-H14A  | 0.9900      | C16A-C17A     | 1.519 (3)   |
| C14-H14B  | 0.9900      | C16A-H16C     | 0.9900      |
| C15-C16   | 1.529 (3)   | C16A-H16D     | 0.9900      |
| C15-H15A  | 0.9900      | C15B-C16B     | 1.520 (3)   |
| C15-H15B  | 0.9900      | C15B-H15E     | 0.9900      |
| C16-C17   | 1.499 (4)   | C15B-H15F     | 0.9900      |
| C16-H16A  | 0.9900      | C17A-H17D     | 0.9800      |
| C16-H16B  | 0.9900      | C17A-H17E     | 0.9800      |
| C17-H17A  | 0.9800      | C17A-H17F     | 0.9800      |
| C17-H17B  | 0.9800      | C17B-C16B     | 1.508 (3)   |
| C17-H17C  | 0.9800      | C17B-H17G     | 0.9800      |
| O1W-H1    | 1.0669 (17) | C17B-H17H     | 0.9800      |
| O1W-H2    | 0.967 (10)  | C17B-H17I     | 0.9800      |
| C12-H12   | 0.9500      | C16B-H16E     | 0.9900      |
| C3A-N4A   | 1.361 (3)   | C16B-H16F     | 0.9900      |
| N3A-C8A   | 1.417 (3)   |               |             |
| O1-C1-N3  | 122.99 (17) | C1B-N3B-C9B   | 117.75 (16) |
| O1-C1-C2  | 121.79 (16) | C8B-N3B-C9B   | 118.90 (16) |
| N3-C1-C2  | 115.21 (16) | O2B-C3B-N4B   | 120.72 (16) |
| C3-N1-C2  | 119.96 (14) | O2B-C3B-N1B   | 121.26 (16) |
| C3-N1-C4  | 122.56 (15) | N4B-C3B-N1B   | 117.88 (15) |
| C2-N1-C4  | 114.99 (14) | N2A-C5A-C4A   | 111.48 (17) |
| N1-C2-C6  | 111.79 (14) | N2A-C5A-H5AA  | 109.3       |
| N1-C2-C1  | 110.13 (14) | C4A-C5A-H5AA  | 109.3       |
| C6-C2-C1  | 106.38 (14) | N2A-C5A-H5AC  | 109.3       |
| N1-C2-C14 | 112.54 (13) | C4A-C5A-H5AC  | 109.3       |
| C6-C2-C14 | 106.21 (14) | H5AA-C5A-H5AC | 108.0       |
| C1-C2-C14 | 109.55 (14) | C3B-N4B-H4BA  | 120.0       |
| C6-N2-C5  | 116.47 (17) | C3B-N4B-H4BB  | 120.0       |
| O2-C3-N4  | 120.07 (17) | H4BA-N4B-H4BB | 120.0       |
| O2-C3-N1  | 122.28 (16) | N1B-C4B-C5B   | 109.07 (15) |
| N4-C3-N1  | 117.62 (16) | N1B-C4B-H4BC  | 109.9       |
| C1-N3-C8  | 121.41 (16) | C5B-C4B-H4BC  | 109.9       |
| C1-N3-C9  | 118.12 (18) | N1B-C4B-H4BD  | 109.9       |
| C8-N3-C9  | 119.87 (17) | C5B-C4B-H4BD  | 109.9       |
| N1-C4-C5  | 109.62 (16) | H4BC-C4B-H4BD | 108.3       |
| N1-C4-H4A | 109.7       | N2A-C6A-C7A   | 119.71 (16) |

|              |             |                |             |
|--------------|-------------|----------------|-------------|
| C5-C4-H4A    | 109.7       | N2A-C6A-C2A    | 127.85 (18) |
| N1-C4-H4AB   | 109.7       | C7A-C6A-C2A    | 112.43 (15) |
| C5-C4-H4AB   | 109.7       | N2B-C5B-C4B    | 112.37 (15) |
| H4A-C4-H4AB  | 108.2       | N2B-C5B-H5BA   | 109.1       |
| C3B-N1B-C2B  | 120.10 (14) | C4B-C5B-H5BA   | 109.1       |
| C3B-N1B-C4B  | 120.14 (15) | N2B-C5B-H5BB   | 109.1       |
| C2B-N1B-C4B  | 115.11 (13) | C4B-C5B-H5BB   | 109.1       |
| O1B-C1B-N3B  | 122.58 (16) | H5BA-C5B-H5BB  | 107.9       |
| O1B-C1B-C2B  | 120.87 (16) | C10A-C7A-C8A   | 119.13 (18) |
| N3B-C1B-C2B  | 116.52 (15) | C10A-C7A-C6A   | 121.89 (16) |
| O1A-C1A-N3A  | 122.70 (18) | C8A-C7A-C6A    | 118.96 (17) |
| O1A-C1A-C2A  | 120.63 (19) | N2B-C6B-C7B    | 119.19 (16) |
| N3A-C1A-C2A  | 116.64 (17) | N2B-C6B-C2B    | 127.82 (16) |
| C3A-N1A-C2A  | 120.97 (16) | C7B-C6B-C2B    | 112.97 (14) |
| C3A-N1A-C4A  | 122.70 (17) | C13A-C8A-C7A   | 119.28 (18) |
| C2A-N1A-C4A  | 113.31 (15) | C13A-C8A-N3A   | 121.10 (17) |
| C3-N4-H4'    | 122.1 (17)  | C7A-C8A-N3A    | 119.58 (18) |
| C3-N4-H4     | 114.8 (16)  | C10B-C7B-C8B   | 119.56 (17) |
| H4'-N4-H4    | 122 (2)     | C10B-C7B-C6B   | 121.31 (16) |
| N2-C5-C4     | 113.11 (16) | C8B-C7B-C6B    | 119.11 (16) |
| N2-C5-H5A    | 109.0       | N3A-C9A-H9AA   | 109.5       |
| C4-C5-H5A    | 109.0       | N3A-C9A-H9AB   | 109.5       |
| N2-C5-H5AB   | 109.0       | H9AA-C9A-H9AB  | 109.5       |
| C4-C5-H5AB   | 109.0       | N3A-C9A-H9AC   | 109.5       |
| H5A-C5-H5AB  | 107.8       | H9AA-C9A-H9AC  | 109.5       |
| N2-C6-C7     | 119.95 (18) | H9AB-C9A-H9AC  | 109.5       |
| N2-C6-C2     | 128.03 (17) | C13B-C8B-C7B   | 119.40 (17) |
| C7-C6-C2     | 111.95 (16) | C13B-C8B-N3B   | 120.79 (17) |
| C10-C7-C8    | 119.57 (19) | C7B-C8B-N3B    | 119.75 (16) |
| C10-C7-C6    | 120.91 (19) | C11A-C10A-C7A  | 121.29 (18) |
| C8-C7-C6     | 119.51 (18) | C11A-C10A-H10A | 119.4       |
| C7-C8-C13    | 119.4 (2)   | C7A-C10A-H10A  | 119.4       |
| C7-C8-N3     | 119.83 (17) | N3B-C9B-H9BA   | 109.5       |
| C13-C8-N3    | 120.8 (2)   | N3B-C9B-H9BB   | 109.5       |
| N3-C9-H9A    | 109.5       | H9BA-C9B-H9BB  | 109.5       |
| N3-C9-H9B    | 109.5       | N3B-C9B-H9BC   | 109.5       |
| H9A-C9-H9B   | 109.5       | H9BA-C9B-H9BC  | 109.5       |
| N3-C9-H9C    | 109.5       | H9BB-C9B-H9BC  | 109.5       |
| H9A-C9-H9C   | 109.5       | C12A-C11A-C10A | 119.1 (2)   |
| H9B-C9-H9C   | 109.5       | C12A-C11A-H11A | 120.5       |
| C6B-N2B-C5B  | 116.85 (15) | C10A-C11A-H11A | 120.5       |
| N1B-C2B-C6B  | 111.02 (13) | C11B-C10B-C7B  | 120.77 (18) |
| N1B-C2B-C1B  | 109.49 (14) | C11B-C10B-H10B | 119.6       |
| C6B-C2B-C1B  | 107.80 (13) | C7B-C10B-H10B  | 119.6       |
| N1B-C2B-C14B | 113.26 (14) | C13A-C12A-C11A | 120.9 (2)   |
| C6B-C2B-C14B | 106.08 (14) | C13A-C12A-H12A | 119.5       |
| C1B-C2B-C14B | 109.01 (13) | C11A-C12A-H12A | 119.5       |
| N1A-C2A-C6A  | 110.41 (15) | C12B-C11B-C10B | 119.48 (19) |

|               |             |                |             |
|---------------|-------------|----------------|-------------|
| N1A-C2A-C1A   | 111.61 (16) | C12B-C11B-H11B | 120.3       |
| C6A-C2A-C1A   | 106.68 (14) | C10B-C11B-H11B | 120.3       |
| N1A-C2A-C14A  | 112.15 (15) | C12A-C13A-C8A  | 120.25 (19) |
| C6A-C2A-C14A  | 107.20 (15) | C12A-C13A-H13A | 119.9       |
| C1A-C2A-C14A  | 108.54 (15) | C8A-C13A-H13A  | 119.9       |
| C6A-N2A-C5A   | 117.45 (16) | C11B-C12B-C13B | 120.90 (19) |
| C11-C10-C7    | 120.5 (2)   | C11B-C12B-H12B | 119.5       |
| C11-C10-H10   | 119.7       | C13B-C12B-H12B | 119.5       |
| C7-C10-H10    | 119.7       | C15A-C14A-C2A  | 113.95 (16) |
| C12-C11-C10   | 119.5 (2)   | C15A-C14A-H14C | 108.8       |
| C12-C11-H11   | 120.3       | C2A-C14A-H14C  | 108.8       |
| C10-C11-H11   | 120.3       | C15A-C14A-H14D | 108.8       |
| C12-C13-C8    | 120.1 (2)   | C2A-C14A-H14D  | 108.8       |
| C12-C13-H13   | 119.9       | H14C-C14A-H14D | 107.7       |
| C8-C13-H13    | 119.9       | C12B-C13B-C8B  | 119.88 (19) |
| C15-C14-C2    | 113.23 (15) | C12B-C13B-H13B | 120.1       |
| C15-C14-H14A  | 108.9       | C8B-C13B-H13B  | 120.1       |
| C2-C14-H14A   | 108.9       | C14A-C15A-C16A | 111.14 (17) |
| C15-C14-H14B  | 108.9       | C14A-C15A-H15C | 109.4       |
| C2-C14-H14B   | 108.9       | C16A-C15A-H15C | 109.4       |
| H14A-C14-H14B | 107.7       | C14A-C15A-H15D | 109.4       |
| C14-C15-C16   | 111.55 (17) | C16A-C15A-H15D | 109.4       |
| C14-C15-H15A  | 109.3       | H15C-C15A-H15D | 108.0       |
| C16-C15-H15A  | 109.3       | C15B-C14B-C2B  | 112.86 (14) |
| C14-C15-H15B  | 109.3       | C15B-C14B-H14E | 109.0       |
| C16-C15-H15B  | 109.3       | C2B-C14B-H14E  | 109.0       |
| H15A-C15-H15B | 108.0       | C15B-C14B-H14F | 109.0       |
| C17-C16-C15   | 114.17 (19) | C2B-C14B-H14F  | 109.0       |
| C17-C16-H16A  | 108.7       | H14E-C14B-H14F | 107.8       |
| C15-C16-H16A  | 108.7       | C17A-C16A-C15A | 113.1 (2)   |
| C17-C16-H16B  | 108.7       | C17A-C16A-H16C | 109.0       |
| C15-C16-H16B  | 108.7       | C15A-C16A-H16C | 109.0       |
| H16A-C16-H16B | 107.6       | C17A-C16A-H16D | 109.0       |
| C16-C17-H17A  | 109.5       | C15A-C16A-H16D | 109.0       |
| C16-C17-H17B  | 109.5       | H16C-C16A-H16D | 107.8       |
| H17A-C17-H17B | 109.5       | C14B-C15B-C16B | 112.89 (16) |
| C16-C17-H17C  | 109.5       | C14B-C15B-H15E | 109.0       |
| H17A-C17-H17C | 109.5       | C16B-C15B-H15E | 109.0       |
| H17B-C17-H17C | 109.5       | C14B-C15B-H15F | 109.0       |
| H1-O1W-H2     | 106 (2)     | C16B-C15B-H15F | 109.0       |
| C13-C12-C11   | 120.9 (2)   | H15E-C15B-H15F | 107.8       |
| C13-C12-H12   | 119.5       | C16A-C17A-H17D | 109.5       |
| C11-C12-H12   | 119.5       | C16A-C17A-H17E | 109.5       |
| O2A-C3A-N4A   | 120.36 (17) | H17D-C17A-H17E | 109.5       |
| O2A-C3A-N1A   | 122.88 (19) | C16A-C17A-H17F | 109.5       |
| N4A-C3A-N1A   | 116.76 (17) | H17D-C17A-H17F | 109.5       |
| C1A-N3A-C8A   | 122.24 (16) | H17E-C17A-H17F | 109.5       |
| C1A-N3A-C9A   | 118.57 (17) | C16B-C17B-H17G | 109.5       |



|               |             |                |             |
|---------------|-------------|----------------|-------------|
| C8A-N3A-C9A   | 118.51 (17) | C16B-C17B-H17H | 109.5       |
| H3-O2W-H5     | 114.3 (17)  | H17G-C17B-H17H | 109.5       |
| N1A-C4A-C5A   | 109.35 (17) | C16B-C17B-H17I | 109.5       |
| N1A-C4A-H4AA  | 109.8       | H17G-C17B-H17I | 109.5       |
| C5A-C4A-H4AA  | 109.8       | H17H-C17B-H17I | 109.5       |
| N1A-C4A-H4AC  | 109.8       | C17B-C16B-C15B | 111.76 (19) |
| C5A-C4A-H4AC  | 109.8       | C17B-C16B-H16E | 109.3       |
| H4AA-C4A-H4AC | 108.3       | C15B-C16B-H16E | 109.3       |
| C3A-N4A-H4AD  | 120.0       | C17B-C16B-H16F | 109.3       |
| C3A-N4A-H4AE  | 120.0       | C15B-C16B-H16F | 109.3       |
| H4AD-N4A-H4AE | 120.0       | H16E-C16B-H16F | 107.9       |
| C1B-N3B-C8B   | 122.70 (14) |                |             |

**Table S13:** Hydrogen-bond geometry (Å, °) for **7a**.

| <i>D</i> —H $\cdots$ <i>A</i>                                 | <i>D</i> —H | H $\cdots$ <i>A</i> | <i>D</i> $\cdots$ <i>A</i> | <i>D</i> —H $\cdots$ <i>A</i> |
|---------------------------------------------------------------|-------------|---------------------|----------------------------|-------------------------------|
| O1 <i>W</i> —H1 $\cdots$ O1 <i>A</i>                          | 1.07 (1)    | 1.81 (1)            | 2.777 (2)                  | 149 (1)                       |
| O1 <i>W</i> —H2 $\cdots$ O2 <i>B</i>                          | 0.97 (1)    | 1.80 (1)            | 2.755 (2)                  | 170 (3)                       |
| O2 <i>W</i> —H3 $\cdots$ O1 <i>W</i>                          | 0.97 (1)    | 1.78 (1)            | 2.742 (3)                  | 171 (2)                       |
| N4—H4' $\cdots$ O1 <i>B</i>                                   | 0.85 (3)    | 2.31 (3)            | 3.039 (2)                  | 144 (2)                       |
| N4—H4' $\cdots$ O2 <i>B</i>                                   | 0.85 (3)    | 2.58 (2)            | 3.079 (2)                  | 119 (2)                       |
| N4—H4 $\cdots$ O2 <i>W</i>                                    | 0.87 (3)    | 2.32 (3)            | 3.170 (3)                  | 164 (2)                       |
| C5—H5 <i>AB</i> $\cdots$ O1 <i>W</i> <sup>i</sup>             | 0.99        | 2.58                | 3.362 (3)                  | 135                           |
| O2 <i>W</i> —H5 $\cdots$ N4 <i>A</i>                          | 0.94 (1)    | 2.00 (3)            | 2.932 (2)                  | 168 (9)                       |
| C9—H9 <i>B</i> $\cdots$ N2 <i>B</i> <sup>ii</sup>             | 0.98        | 2.54                | 3.460 (3)                  | 156                           |
| C14—H14 <i>B</i> $\cdots$ O2                                  | 0.99        | 2.21                | 2.801 (2)                  | 117                           |
| C4 <i>A</i> —H4 <i>AC</i> $\cdots$ O2 <i>W</i> <sup>iii</sup> | 0.99        | 2.33                | 3.253 (3)                  | 155                           |
| N4 <i>A</i> —H4 <i>AD</i> $\cdots$ O2                         | 0.88        | 2.09                | 2.966 (2)                  | 173                           |
| N4 <i>A</i> —H4 <i>AE</i> $\cdots$ O2 <i>W</i> <sup>iii</sup> | 0.88        | 2.09                | 2.942 (2)                  | 162                           |
| N4 <i>B</i> —H4 <i>BA</i> $\cdots$ O2 <i>B</i> <sup>i</sup>   | 0.88        | 2.13                | 2.977 (2)                  | 161                           |
| N4 <i>B</i> —H4 <i>BB</i> $\cdots$ O2 <i>A</i> <sup>i</sup>   | 0.88        | 2.27                | 3.142 (2)                  | 171                           |
| C4 <i>B</i> —H4 <i>BC</i> $\cdots$ O2 <i>A</i> <sup>i</sup>   | 0.99        | 2.28                | 3.084 (2)                  | 138                           |
| C9 <i>A</i> —H9 <i>AA</i> $\cdots$ N2 <i>A</i> <sup>iv</sup>  | 0.98        | 2.52                | 3.482 (3)                  | 166                           |
| C9 <i>A</i> —H9 <i>AB</i> $\cdots$ O1 <sup>v</sup>            | 0.98        | 2.60                | 3.496 (3)                  | 151                           |
| C9 <i>A</i> —H9 <i>AC</i> $\cdots$ O1 <i>B</i> <sup>i</sup>   | 0.98        | 2.60                | 3.276 (2)                  | 126                           |
| C13 <i>A</i> —H13 <i>A</i> $\cdots$ O1 <sup>v</sup>           | 0.95        | 2.35                | 3.202 (2)                  | 149                           |
| C14 <i>A</i> —H14 <i>D</i> $\cdots$ O2 <i>A</i>               | 0.99        | 2.24                | 2.848 (3)                  | 118                           |
| C14 <i>B</i> —H14 <i>E</i> $\cdots$ O2 <i>B</i>               | 0.99        | 2.31                | 2.869 (2)                  | 114                           |

Symmetry codes: (i)  $-x+1, -y+1, -z+1$ ; (ii)  $-x+1, -y+2, -z+1$ ; (iii)  $-x, -y+1, -z+1$ ; (iv)  $-x, -y, -z+1$ ; (v)  $x, y-1, z$ .

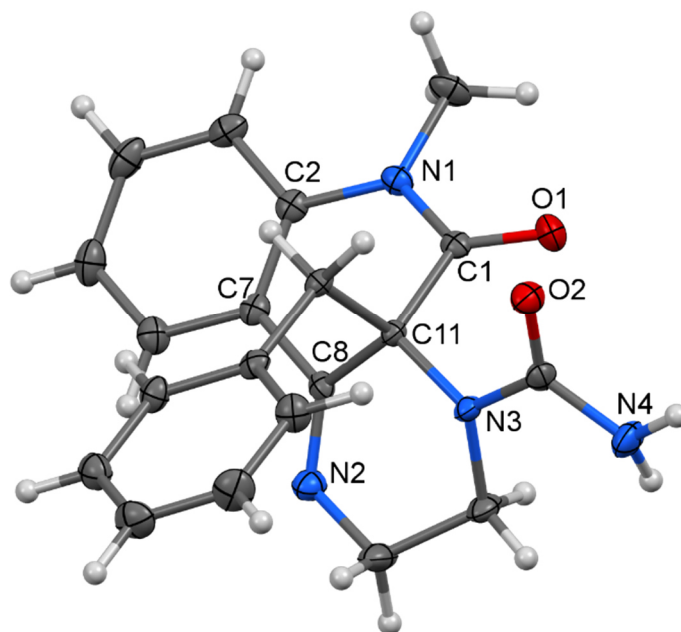

**Figure S32:** Molecular structure of **7b** – ORTEP view, 40% probability level

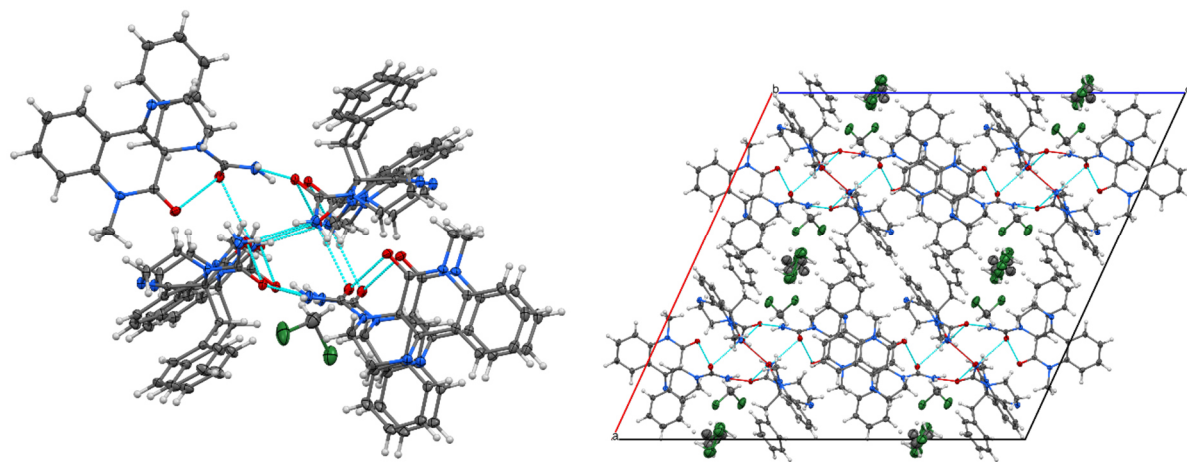

**Figure S33:** Molecular structure of **7b** – H-bonding representation (left) supramolecular architecture, view along b axis

**Table S14:** Experimental details for **7b**.

|                                                                            |                                                                                                |
|----------------------------------------------------------------------------|------------------------------------------------------------------------------------------------|
| Crystal data                                                               |                                                                                                |
| Chemical formula                                                           | $2(\text{C}_{20}\text{H}_{20}\text{N}_4\text{O}_2) \cdot 1.5(\text{CH}_2\text{Cl}_2)$          |
| $M_r$                                                                      | 824.19                                                                                         |
| Crystal system, space group                                                | Monoclinic, $C2/c$                                                                             |
| Temperature (K)                                                            | 150                                                                                            |
| $a, b, c$ (Å)                                                              | 28.5456 (10), 9.6974 (3), 30.9033 (11)                                                         |
| $\beta$ (°)                                                                | 114.810 (1)                                                                                    |
| $V$ (Å <sup>3</sup> )                                                      | 7765.0 (5)                                                                                     |
| $Z$                                                                        | 8                                                                                              |
| Radiation type                                                             | Mo $K\alpha$                                                                                   |
| $\mu$ (mm <sup>-1</sup> )                                                  | 0.29                                                                                           |
| Crystal size (mm)                                                          | $0.59 \times 0.43 \times 0.13$                                                                 |
| Data collection                                                            |                                                                                                |
| Diffractometer                                                             | Bruker D8 - Venture                                                                            |
| Absorption correction                                                      | Multi-scan<br><i>SADABS2016/2</i> - Bruker AXS area detector scaling and absorption correction |
| No. of measured, independent and observed [ $I > 2\sigma(I)$ ] reflections | 90897, 8953, 7534                                                                              |
| $R_{\text{int}}$                                                           | 0.040                                                                                          |
| $(\sin \theta/\lambda)_{\text{max}}$ (Å <sup>-1</sup> )                    | 0.651                                                                                          |
| Refinement                                                                 |                                                                                                |
| $R[F^2 > 2\sigma(F^2)]$ , $wR(F^2)$ , $S$                                  | 0.054, 0.239, 1.06                                                                             |
| No. of reflections                                                         | 8953                                                                                           |
| No. of parameters                                                          | 545                                                                                            |
| No. of restraints                                                          | 20                                                                                             |
| H-atom treatment                                                           | H atoms treated by a mixture of independent and constrained refinement                         |
| $\Delta\rho_{\text{max}}$ , $\Delta\rho_{\text{min}}$ (e Å <sup>-3</sup> ) | 0.96, -1.04                                                                                    |

Computer programs: Bruker Instrument Service vV6.2.3, *APEX3* v2016.5-0 (Bruker AXS), *SAINT* V8.37A (Bruker AXS Inc., 2015), *XT*, *VERSION* 2014/5' *\_computing\_structure\_refinement* 'SHELXL2017/1' (Sheldrick, 2017), *PLATON* (Spek, 2009).

**Table S15:** Geometric parameters (Å, °) for **7b**.

|         |           |           |           |
|---------|-----------|-----------|-----------|
| C11—C21 | 1.756 (3) | C18—H18   | 0.9500    |
| O1—C1   | 1.214 (2) | C19—C20   | 1.396 (3) |
| N1—C1   | 1.365 (2) | C19—H19   | 0.9500    |
| N1—C2   | 1.418 (2) | C20—H20   | 0.9500    |
| N1—C12  | 1.471 (2) | C21—H21A  | 0.9900    |
| C1—C11  | 1.559 (2) | C21—H21B  | 0.9900    |
| C12—C21 | 1.754 (3) | C101—C111 | 1.547 (2) |
| O2—C13  | 1.240 (2) | C102—C107 | 1.398 (2) |
| N2—C8   | 1.269 (2) | C102—C103 | 1.400 (2) |
| N2—C9   | 1.461 (3) | C103—C104 | 1.382 (3) |
| C2—C3   | 1.391 (3) | C103—H103 | 0.9500    |
| C2—C7   | 1.399 (3) | C104—C105 | 1.383 (3) |
| O3—C101 | 1.232 (2) | C104—H104 | 0.9500    |
| N3—C13  | 1.373 (2) | C105—C106 | 1.381 (3) |
| N3—C11  | 1.455 (2) | C105—H105 | 0.9500    |
| N3—C10  | 1.459 (2) | C106—C107 | 1.391 (2) |
| C3—C4   | 1.385 (3) | C106—H106 | 0.9500    |
| C3—H3   | 0.9500    | C107—C108 | 1.482 (2) |
| N4—C13  | 1.362 (2) | C108—C111 | 1.535 (2) |
| N4—H4A  | 0.96 (3)  | C109—C110 | 1.509 (3) |
| N4—H4B  | 0.86 (3)  | C109—H10C | 0.9900    |
| O4—C113 | 1.227 (2) | C109—H10D | 0.9900    |
| C4—C5   | 1.392 (3) | C110—H11A | 0.9900    |
| C4—H4   | 0.9500    | C110—H11B | 0.9900    |
| N5—C101 | 1.361 (2) | C111—C114 | 1.577 (2) |
| N5—C102 | 1.414 (2) | C112—H11C | 0.9800    |
| N5—C112 | 1.469 (2) | C112—H11D | 0.9800    |
| C5—C6   | 1.373 (3) | C112—H11E | 0.9800    |
| C5—H5   | 0.9500    | C114—C115 | 1.508 (2) |
| N6—C108 | 1.267 (2) | C114—H11F | 0.9900    |
| N6—C109 | 1.460 (2) | C114—H11G | 0.9900    |
| C6—C7   | 1.395 (2) | C115—C120 | 1.389 (3) |
| C6—H6   | 0.9500    | C115—C116 | 1.394 (3) |
| N7—C113 | 1.385 (2) | C116—C117 | 1.385 (3) |
| N7—C111 | 1.454 (2) | C116—H116 | 0.9500    |
| N7—C110 | 1.464 (2) | C117—C118 | 1.381 (3) |
| C7—C8   | 1.479 (3) | C117—H117 | 0.9500    |
| N8—C113 | 1.359 (2) | C118—C119 | 1.376 (3) |
| N8—H8A  | 0.82 (3)  | C118—H118 | 0.9500    |
| N8—H8B  | 0.86 (3)  | C119—C120 | 1.389 (3) |

|            |             |                        |             |
|------------|-------------|------------------------|-------------|
| C8—C11     | 1.531 (2)   | C119—H119              | 0.9500      |
| C9—C10     | 1.512 (3)   | C120—H120              | 0.9500      |
| C9—H9A     | 0.9900      | C22—C22 <sup>i</sup>   | 1.12 (3)    |
| C9—H9B     | 0.9900      | C22—Cl3 <sup>i</sup>   | 1.124 (18)  |
| C10—H10A   | 0.9900      | C22—Cl4                | 1.730 (12)  |
| C10—H10B   | 0.9900      | C22—Cl3                | 1.748 (12)  |
| C11—C14    | 1.566 (2)   | C22—H22A               | 0.979 (9)   |
| C12—H12A   | 0.9800      | C22—H22B               | 0.977 (9)   |
| C12—H12B   | 0.9800      | Cl3—Cl3 <sup>i</sup>   | 1.95 (4)    |
| C12—H12C   | 0.9800      | Cl3—H22D <sup>i</sup>  | 0.83 (5)    |
| C14—C15    | 1.508 (2)   | C22A—C22A <sup>i</sup> | 1.53 (3)    |
| C14—H14A   | 0.9900      | C22A—Cl3A <sup>i</sup> | 1.56 (2)    |
| C14—H14B   | 0.9900      | C22A—Cl3A              | 1.675 (12)  |
| C17—C18    | 1.384 (3)   | C22A—Cl4A              | 1.799 (12)  |
| C17—C16    | 1.388 (3)   | C22A—Cl4A <sup>i</sup> | 1.876 (15)  |
| C17—H17    | 0.9500      | C22A—H22C              | 1.011 (9)   |
| C16—C15    | 1.391 (3)   | C22A—H22D              | 1.001 (9)   |
| C16—H16    | 0.9500      | Cl4A—Cl4A <sup>i</sup> | 1.183 (10)  |
| C15—C20    | 1.391 (3)   | Cl3A—Cl3A <sup>i</sup> | 2.22 (4)    |
| C18—C19    | 1.381 (3)   |                        |             |
| C1—N1—C2   | 122.67 (15) | C105—C104—H104         | 119.5       |
| C1—N1—C12  | 118.44 (16) | C106—C105—C104         | 119.89 (18) |
| C2—N1—C12  | 118.22 (16) | C106—C105—H105         | 120.1       |
| O1—C1—N1   | 122.82 (16) | C104—C105—H105         | 120.1       |
| O1—C1—C11  | 121.20 (16) | C105—C106—C107         | 120.20 (18) |
| N1—C1—C11  | 115.96 (14) | C105—C106—H106         | 119.9       |
| C8—N2—C9   | 116.80 (16) | C107—C106—H106         | 119.9       |
| C3—C2—C7   | 120.16 (17) | C106—C107—C102         | 119.89 (17) |
| C3—C2—N1   | 120.69 (17) | C106—C107—C108         | 121.33 (16) |
| C7—C2—N1   | 119.12 (16) | C102—C107—C108         | 118.78 (15) |
| C13—N3—C11 | 120.39 (14) | N6—C108—C107           | 118.96 (15) |
| C13—N3—C10 | 120.42 (15) | N6—C108—C111           | 127.97 (16) |
| C11—N3—C10 | 116.41 (14) | C107—C108—C111         | 112.94 (14) |
| C4—C3—C2   | 119.48 (18) | N6—C109—C110           | 112.22 (15) |
| C4—C3—H3   | 120.3       | N6—C109—H10C           | 109.2       |
| C2—C3—H3   | 120.3       | C110—C109—H10C         | 109.2       |
| C13—N4—H4A | 114.9 (15)  | N6—C109—H10D           | 109.2       |
| C13—N4—H4B | 121.8 (18)  | C110—C109—H10D         | 109.2       |
| H4A—N4—H4B | 119 (2)     | H10C—C109—H10D         | 107.9       |
| C3—C4—C5   | 120.84 (19) | N7—C110—C109           | 109.04 (15) |
| C3—C4—H4   | 119.6       | N7—C110—H11A           | 109.9       |

|               |             |                |             |
|---------------|-------------|----------------|-------------|
| C5—C4—H4      | 119.6       | C109—C110—H11A | 109.9       |
| C101—N5—C102  | 122.35 (15) | N7—C110—H11B   | 109.9       |
| C101—N5—C112  | 117.74 (15) | C109—C110—H11B | 109.9       |
| C102—N5—C112  | 119.67 (15) | H11A—C110—H11B | 108.3       |
| C6—C5—C4      | 119.31 (19) | N7—C111—C108   | 111.07 (13) |
| C6—C5—H5      | 120.3       | N7—C111—C101   | 109.63 (13) |
| C4—C5—H5      | 120.3       | C108—C111—C101 | 108.03 (13) |
| C108—N6—C109  | 115.97 (15) | N7—C111—C114   | 112.52 (13) |
| C5—C6—C7      | 121.12 (19) | C108—C111—C114 | 106.11 (13) |
| C5—C6—H6      | 119.4       | C101—C111—C114 | 109.33 (13) |
| C7—C6—H6      | 119.4       | N5—C112—H11C   | 109.5       |
| C113—N7—C111  | 121.24 (14) | N5—C112—H11D   | 109.5       |
| C113—N7—C110  | 120.73 (14) | H11C—C112—H11D | 109.5       |
| C111—N7—C110  | 115.88 (14) | N5—C112—H11E   | 109.5       |
| C6—C7—C2      | 119.03 (17) | H11C—C112—H11E | 109.5       |
| C6—C7—C8      | 121.70 (16) | H11D—C112—H11E | 109.5       |
| C2—C7—C8      | 119.24 (16) | O4—C113—N8     | 120.98 (17) |
| C113—N8—H8A   | 115.6 (17)  | O4—C113—N7     | 123.45 (16) |
| C113—N8—H8B   | 116.9 (16)  | N8—C113—N7     | 115.36 (16) |
| H8A—N8—H8B    | 117 (2)     | C115—C114—C111 | 112.53 (13) |
| N2—C8—C7      | 119.61 (16) | C115—C114—H11F | 109.1       |
| N2—C8—C11     | 127.62 (17) | C111—C114—H11F | 109.1       |
| C7—C8—C11     | 112.53 (14) | C115—C114—H11G | 109.1       |
| N2—C9—C10     | 112.45 (16) | C111—C114—H11G | 109.1       |
| N2—C9—H9A     | 109.1       | H11F—C114—H11G | 107.8       |
| C10—C9—H9A    | 109.1       | C120—C115—C116 | 117.81 (17) |
| N2—C9—H9B     | 109.1       | C120—C115—C114 | 120.78 (16) |
| C10—C9—H9B    | 109.1       | C116—C115—C114 | 121.41 (16) |
| H9A—C9—H9B    | 107.8       | C117—C116—C115 | 121.07 (18) |
| N3—C10—C9     | 109.91 (15) | C117—C116—H116 | 119.5       |
| N3—C10—H10A   | 109.7       | C115—C116—H116 | 119.5       |
| C9—C10—H10A   | 109.7       | C118—C117—C116 | 120.15 (19) |
| N3—C10—H10B   | 109.7       | C118—C117—H117 | 119.9       |
| C9—C10—H10B   | 109.7       | C116—C117—H117 | 119.9       |
| H10A—C10—H10B | 108.2       | C119—C118—C117 | 119.68 (19) |
| N3—C11—C8     | 111.49 (13) | C119—C118—H118 | 120.2       |
| N3—C11—C1     | 109.79 (13) | C117—C118—H118 | 120.2       |
| C8—C11—C1     | 106.80 (14) | C118—C119—C120 | 120.2 (2)   |
| N3—C11—C14    | 112.20 (14) | C118—C119—H119 | 119.9       |
| C8—C11—C14    | 106.97 (13) | C120—C119—H119 | 119.9       |
| C1—C11—C14    | 109.40 (13) | C115—C120—C119 | 121.11 (19) |

|               |             |                                           |            |
|---------------|-------------|-------------------------------------------|------------|
| O2—C13—N4     | 120.00 (17) | C115—C120—H120                            | 119.4      |
| O2—C13—N3     | 123.24 (16) | C119—C120—H120                            | 119.4      |
| N4—C13—N3     | 116.61 (17) | C22 <sup>i</sup> —C22—Cl3 <sup>i</sup>    | 102.1 (18) |
| N1—C12—H12A   | 109.5       | C22 <sup>i</sup> —C22—Cl4                 | 71.1 (5)   |
| N1—C12—H12B   | 109.5       | Cl3 <sup>i</sup> —C22—Cl4                 | 149.9 (18) |
| H12A—C12—H12B | 109.5       | C22 <sup>i</sup> —C22—Cl3                 | 39.0 (9)   |
| N1—C12—H12C   | 109.5       | Cl3 <sup>i</sup> —C22—Cl3                 | 82 (2)     |
| H12A—C12—H12C | 109.5       | Cl4—C22—Cl3                               | 105.1 (7)  |
| H12B—C12—H12C | 109.5       | C22 <sup>i</sup> —C22—H22A                | 104.3 (17) |
| C15—C14—C11   | 112.02 (14) | Cl3 <sup>i</sup> —C22—H22A                | 41 (2)     |
| C15—C14—H14A  | 109.2       | Cl4—C22—H22A                              | 110.5 (12) |
| C11—C14—H14A  | 109.2       | Cl3—C22—H22A                              | 109.4 (12) |
| C15—C14—H14B  | 109.2       | C22 <sup>i</sup> —C22—H22B                | 140.1 (18) |
| C11—C14—H14B  | 109.2       | Cl3 <sup>i</sup> —C22—H22B                | 93 (2)     |
| H14A—C14—H14B | 107.9       | Cl4—C22—H22B                              | 110.8 (12) |
| C18—C17—C16   | 120.02 (19) | Cl3—C22—H22B                              | 109.5 (12) |
| C18—C17—H17   | 120.0       | H22A—C22—H22B                             | 111.3 (13) |
| C16—C17—H17   | 120.0       | C22—Cl4—C22 <sup>i</sup>                  | 37.9 (10)  |
| C17—C16—C15   | 121.21 (18) | C22 <sup>i</sup> —Cl3—C22                 | 38.9 (14)  |
| C17—C16—H16   | 119.4       | C22 <sup>i</sup> —Cl3—Cl3 <sup>i</sup>    | 62.8 (17)  |
| C15—C16—H16   | 119.4       | C22—Cl3—Cl3 <sup>i</sup>                  | 34.9 (8)   |
| C16—C15—C20   | 118.19 (17) | C22 <sup>i</sup> —Cl3—H22A <sup>i</sup>   | 59.0 (10)  |
| C16—C15—C14   | 120.85 (16) | C22—Cl3—H22A <sup>i</sup>                 | 71 (2)     |
| C20—C15—C14   | 120.95 (16) | Cl3 <sup>i</sup> —Cl3—H22A <sup>i</sup>   | 106 (3)    |
| C19—C18—C17   | 119.70 (18) | C22 <sup>i</sup> —Cl3—H22D <sup>i</sup>   | 90.2 (18)  |
| C19—C18—H18   | 120.2       | C22—Cl3—H22D <sup>i</sup>                 | 71.6 (10)  |
| C17—C18—H18   | 120.2       | Cl3 <sup>i</sup> —Cl3—H22D <sup>i</sup>   | 93.0 (16)  |
| C18—C19—C20   | 120.1 (2)   | H22A <sup>i</sup> —Cl3—H22D <sup>i</sup>  | 48 (3)     |
| C18—C19—H19   | 119.9       | C22A <sup>i</sup> —C22A—Cl3A <sup>i</sup> | 65.7 (11)  |
| C20—C19—H19   | 119.9       | C22A <sup>i</sup> —C22A—Cl3A              | 57.8 (9)   |
| C15—C20—C19   | 120.73 (19) | Cl3A <sup>i</sup> —C22A—Cl3A              | 86.6 (19)  |
| C15—C20—H20   | 119.6       | C22A <sup>i</sup> —C22A—Cl4A              | 68.0 (8)   |
| C19—C20—H20   | 119.6       | Cl3A <sup>i</sup> —C22A—Cl4A              | 96.5 (11)  |
| Cl2—C21—Cl1   | 111.09 (17) | Cl3A—C22A—Cl4A                            | 118.4 (7)  |
| Cl2—C21—H21A  | 109.4       | C22A <sup>i</sup> —C22A—H22C              | 153.1 (17) |
| Cl1—C21—H21A  | 109.4       | Cl3A <sup>i</sup> —C22A—H22C              | 141 (2)    |
| Cl2—C21—H21B  | 109.4       | Cl3A—C22A—H22C                            | 111.6 (11) |
| Cl1—C21—H21B  | 109.4       | Cl4A—C22A—H22C                            | 103.3 (11) |
| H21A—C21—H21B | 108.0       | Cl4A <sup>i</sup> —C22A—H22C              | 94.4 (15)  |
| O3—C101—N5    | 121.62 (15) | C22A <sup>i</sup> —C22A—H22D              | 101.4 (17) |
| O3—C101—C111  | 120.34 (15) | Cl3A <sup>i</sup> —C22A—H22D              | 37 (2)     |

|                |             |                                           |            |
|----------------|-------------|-------------------------------------------|------------|
| N5—C101—C111   | 118.04 (14) | Cl3A—C22A—H22D                            | 112.6 (11) |
| C107—C102—C103 | 119.53 (17) | Cl4A—C22A—H22D                            | 104.2 (11) |
| C107—C102—N5   | 119.50 (15) | Cl4A <sup>i</sup> —C22A—H22D              | 140.9 (13) |
| C103—C102—N5   | 120.95 (16) | H22C—C22A—H22D                            | 105.5 (12) |
| C104—C103—C102 | 119.53 (18) | Cl4A <sup>i</sup> —Cl4A—C22A              | 74.8 (7)   |
| C104—C103—H103 | 120.2       | C22A <sup>i</sup> —Cl3A—C22A              | 56.5 (12)  |
| C102—C103—H103 | 120.2       | C22A <sup>i</sup> —Cl3A—Cl3A <sup>i</sup> | 49.0 (11)  |
| C103—C104—C105 | 120.90 (18) | C22A—Cl3A—Cl3A <sup>i</sup>               | 44.5 (10)  |
| C103—C104—H104 | 119.5       | H22A <sup>i</sup> —Cl3A—H22D <sup>i</sup> | 41 (3)     |

Symmetry code: (i)  $-x+1, y, -z+1/2$ .

**Table S16:** Hydrogen-bond geometry (Å, °) for **7b**.

| <i>D</i> —H $\cdots$ <i>A</i>                                         | <i>D</i> —H | H $\cdots$ <i>A</i> | <i>D</i> $\cdots$ <i>A</i> | <i>D</i> —H $\cdots$ <i>A</i> |
|-----------------------------------------------------------------------|-------------|---------------------|----------------------------|-------------------------------|
| N4—H4 <i>A</i> $\cdots$ O3                                            | 0.96 (3)    | 2.51 (3)            | 3.240 (2)                  | 132.6 (19)                    |
| N4—H4 <i>B</i> $\cdots$ O4                                            | 0.86 (3)    | 2.14 (3)            | 2.847 (2)                  | 139 (2)                       |
| C10—H10 <sup><i>A</i></sup> $\cdots$ Cl4 <sup><i>A</i></sup> <i>b</i> | 0.99        | 2.88                | 3.675 (5)                  | 138                           |
| C14—H14 <i>A</i> $\cdots$ O2                                          | 0.99        | 2.25                | 2.876 (2)                  | 120                           |
| C21—H21 <i>A</i> $\cdots$ O2                                          | 0.99        | 2.59                | 3.476 (3)                  | 148                           |
| C114—H11 <i>G</i> $\cdots$ O4                                         | 0.99        | 2.34                | 2.899 (2)                  | 115                           |
| N8—H8 <i>A</i> $\cdots$ O3 <sup>i</sup>                               | 0.82 (3)    | 2.25 (3)            | 3.051 (2)                  | 164 (2)                       |
| N8—H8 <i>B</i> $\cdots$ O2 <sup>i</sup>                               | 0.86 (3)    | 2.17 (3)            | 3.020 (2)                  | 170 (2)                       |
| C112—H11 <i>C</i> $\cdots$ O1 <sup>ii</sup>                           | 0.98        | 2.37                | 3.305 (2)                  | 159                           |
| C110—H11 <i>B</i> $\cdots$ O1 <sup>i</sup>                            | 0.99        | 2.39                | 3.260 (2)                  | 147                           |

Symmetry codes: (i)  $-x+3/2, y+1/2, -z+1/2$ ; (ii)  $-x+3/2, y-1/2, -z+1/2$ .



## ESI-MS spectra of compounds 2, 3, 4, 5, 6, 7, 8

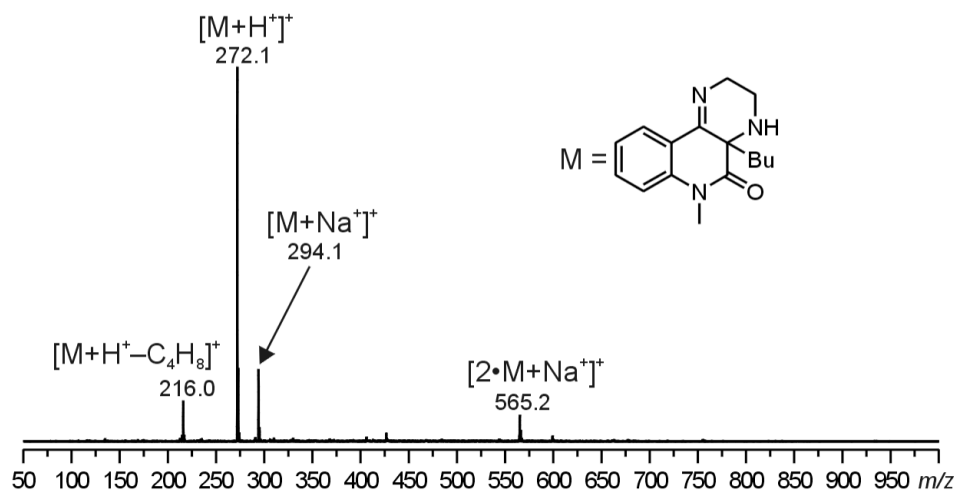

**Figure S34:** The positive-ion ESI mass spectra of compound **2a**. The assignments for observed signals are shown in the brackets.

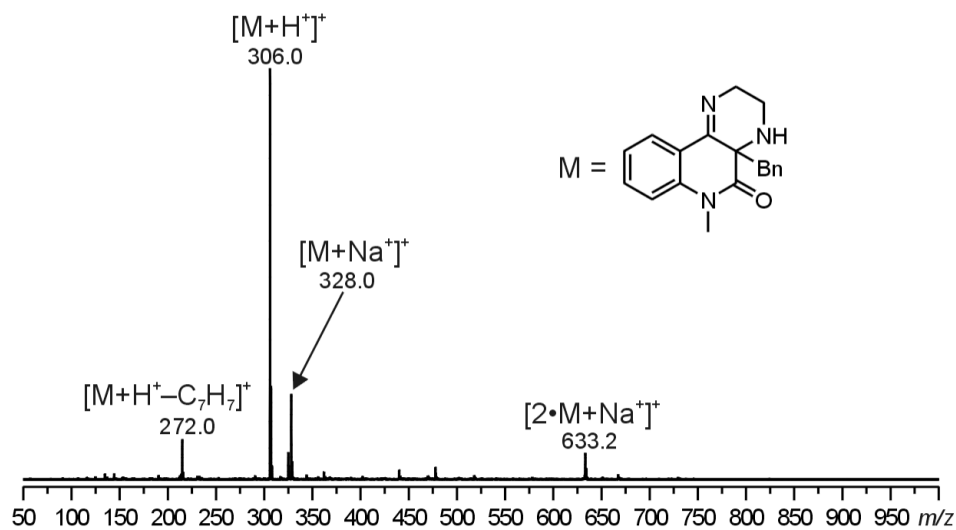

**Figure S35:** The positive-ion ESI mass spectra of compound **2b**. The assignments for observed signals are shown in the brackets.

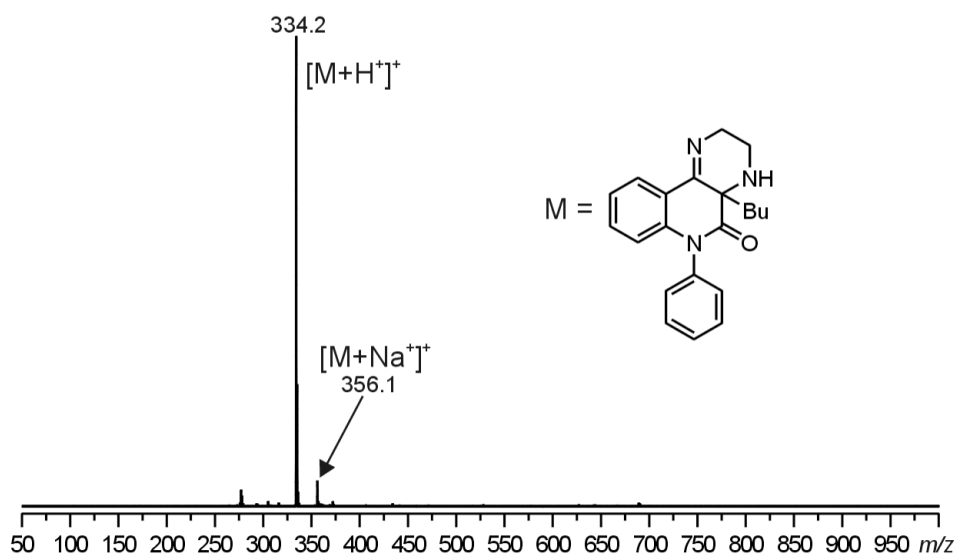

**Figure S36:** The positive-ion ESI mass spectra of compound **2d**. The assignments for observed signals are shown in the brackets.

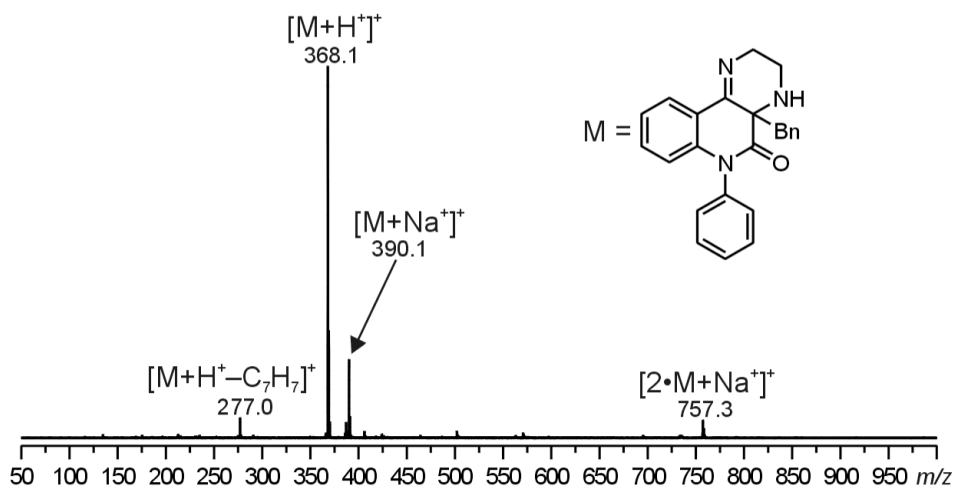

**Figure S37:** The positive-ion ESI mass spectra of compound **2e**. The assignments for observed signals are shown in the brackets.

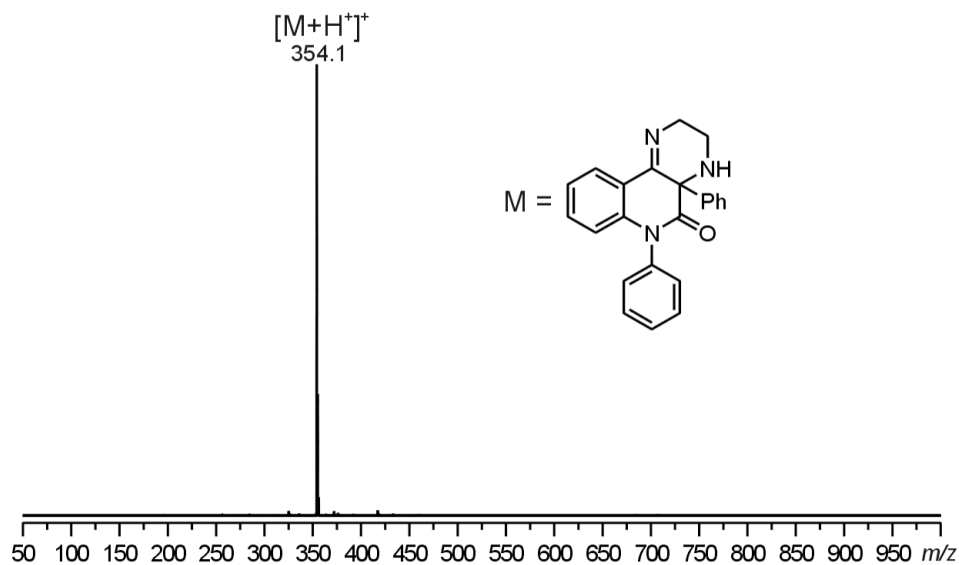

**Figure S38:** The positive-ion ESI mass spectra of compound **2f**. The assignments for observed signals are shown in the brackets.

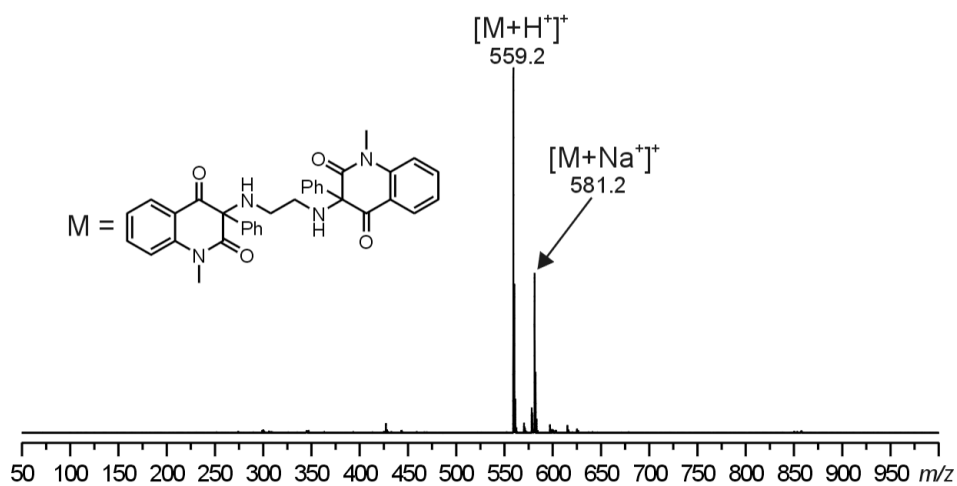

**Figure S39:** The positive-ion ESI mass spectra of compound **3c**. The assignments for observed signals are shown in the brackets.

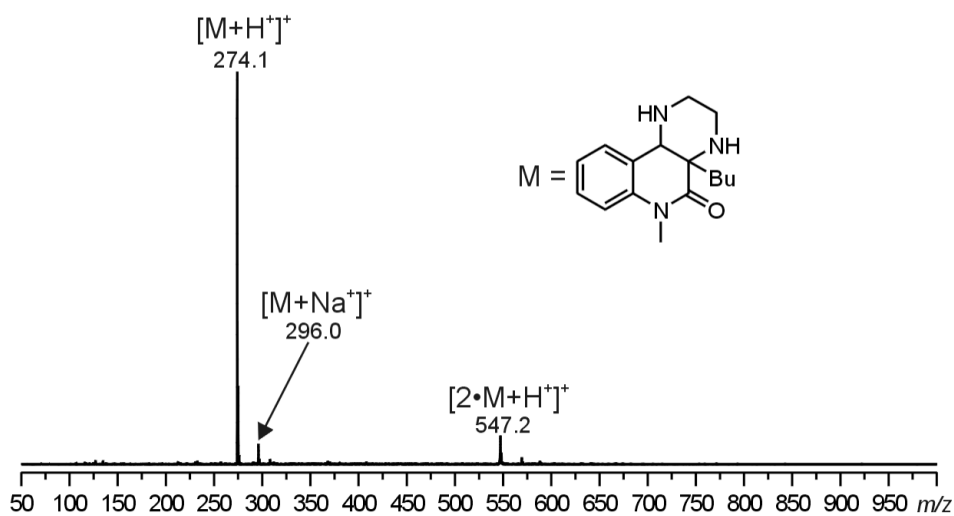

**Figure S40:** The positive-ion ESI mass spectra of compound **4a**. The assignments for observed signals are shown in the brackets.

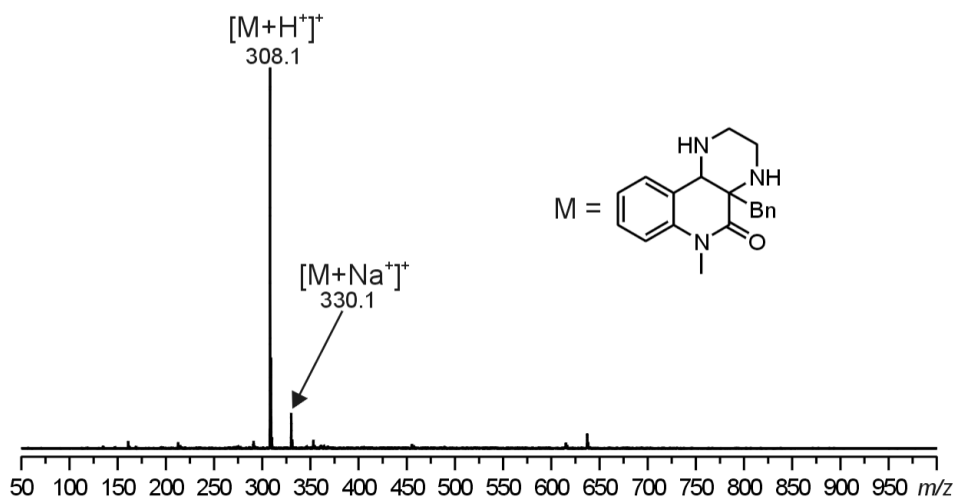

**Figure S41:** The positive-ion ESI mass spectra of compound **4b**. The assignments for observed signals are shown in the brackets.

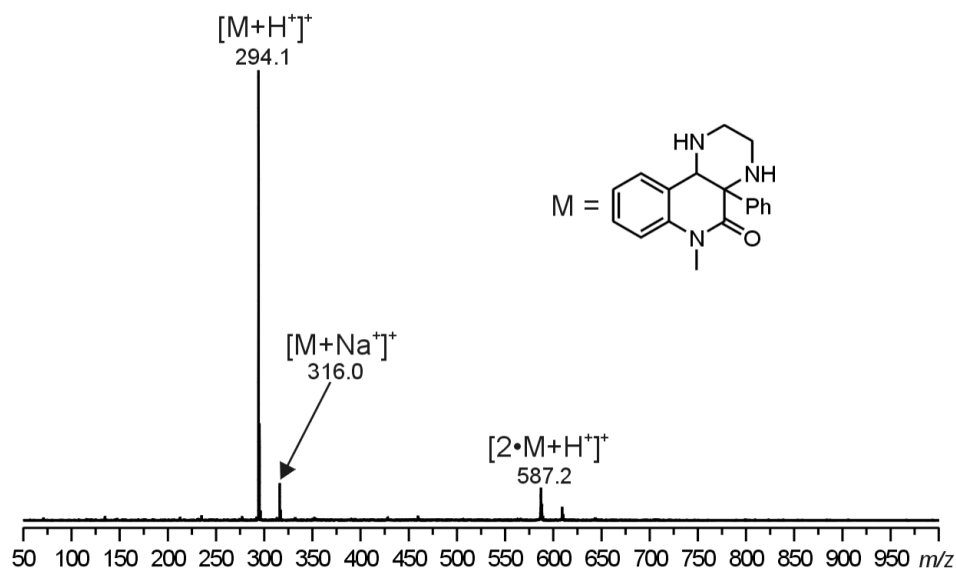

**Figure S42:** The positive-ion ESI mass spectra of compound **4c**. The assignments for observed signals are shown in the brackets.

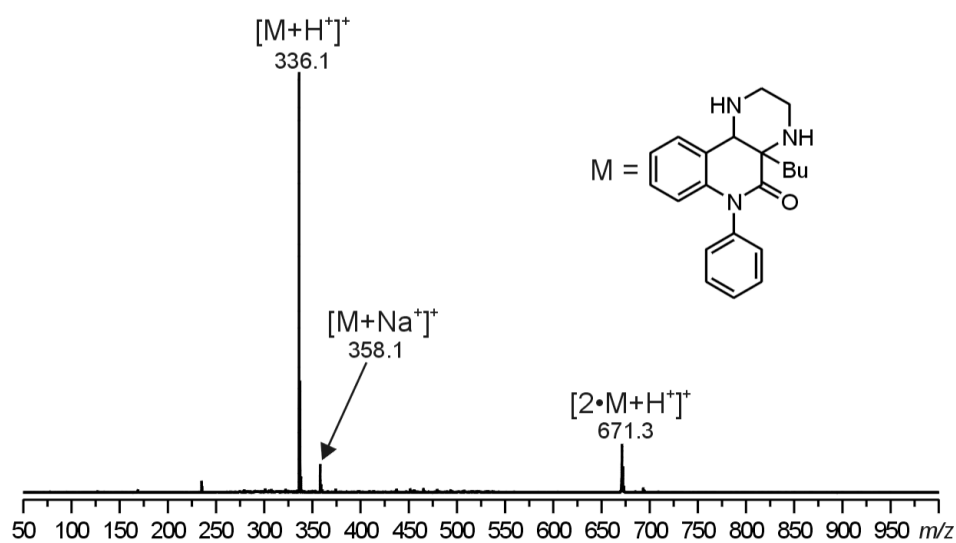

**Figure S43:** The positive-ion ESI mass spectra of compound **4d**. The assignments for observed signals are shown in the brackets.

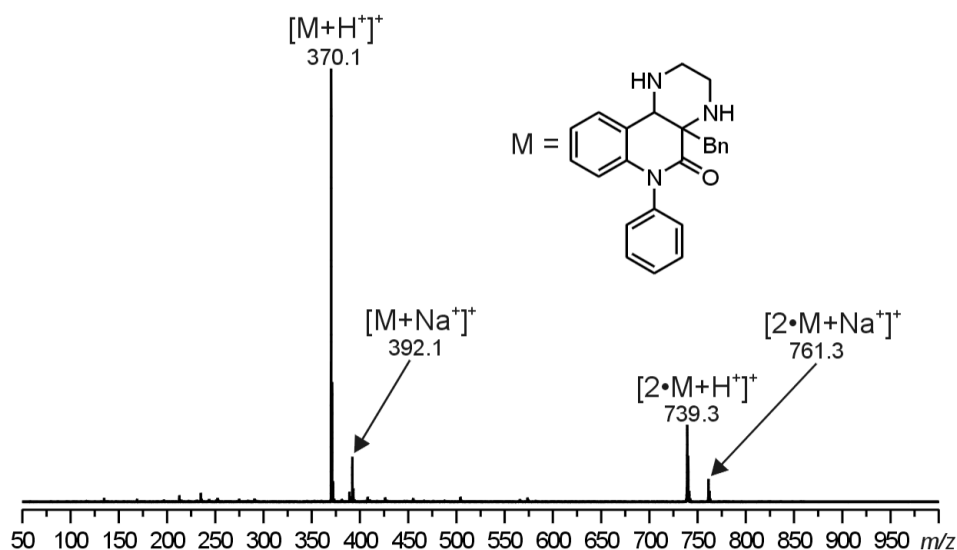

**Figure S45:** The positive-ion ESI mass spectra of compound **4e**. The assignments for observed signals are shown in the brackets.

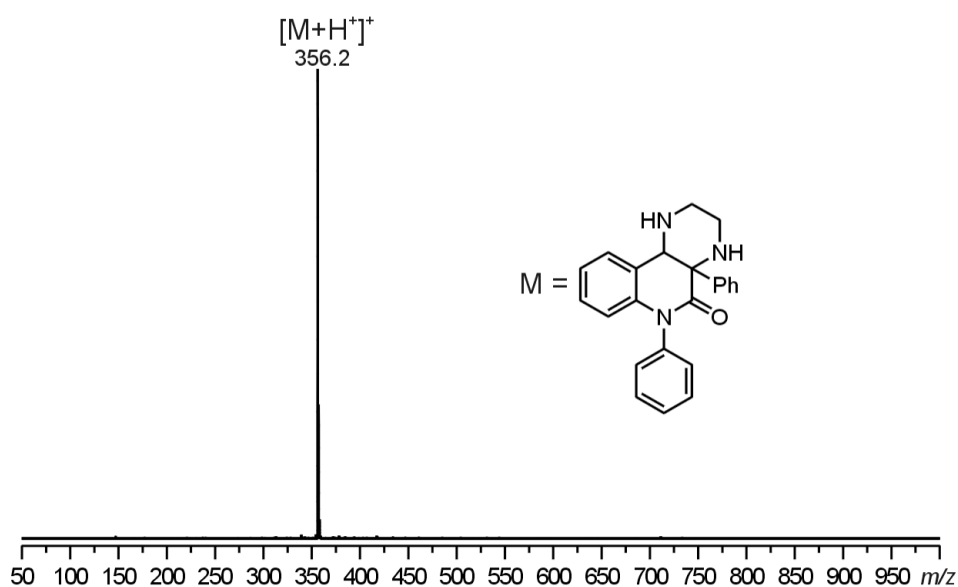

**Figure S46:** The positive-ion ESI mass spectra of compound **4f**. The assignments for observed signals are shown in the brackets.

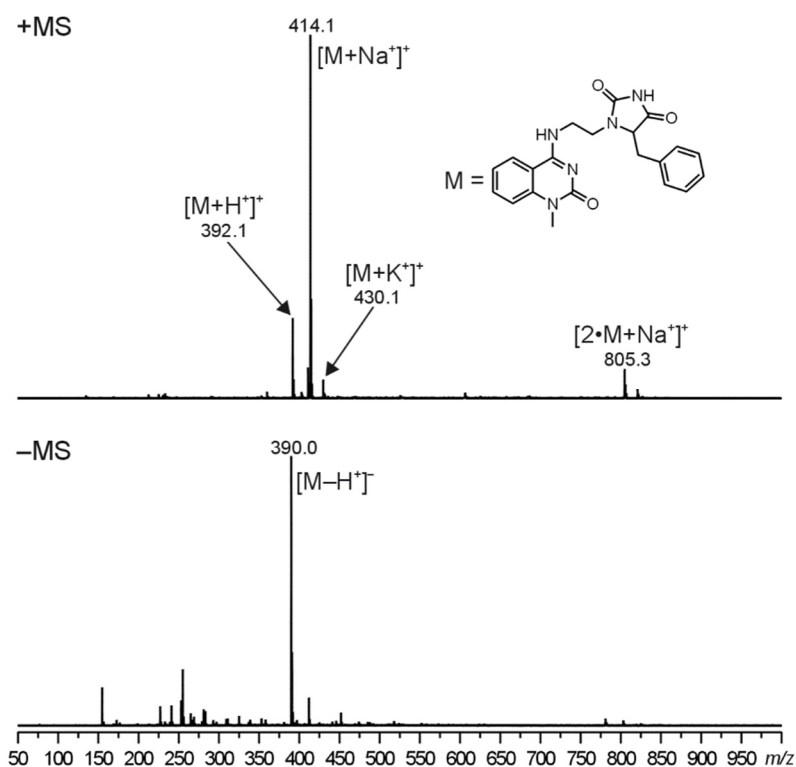

**Figure S47:** The positive and negative-ion ESI mass spectra of compound **5b**. The assignments for observed signals are shown in the brackets.

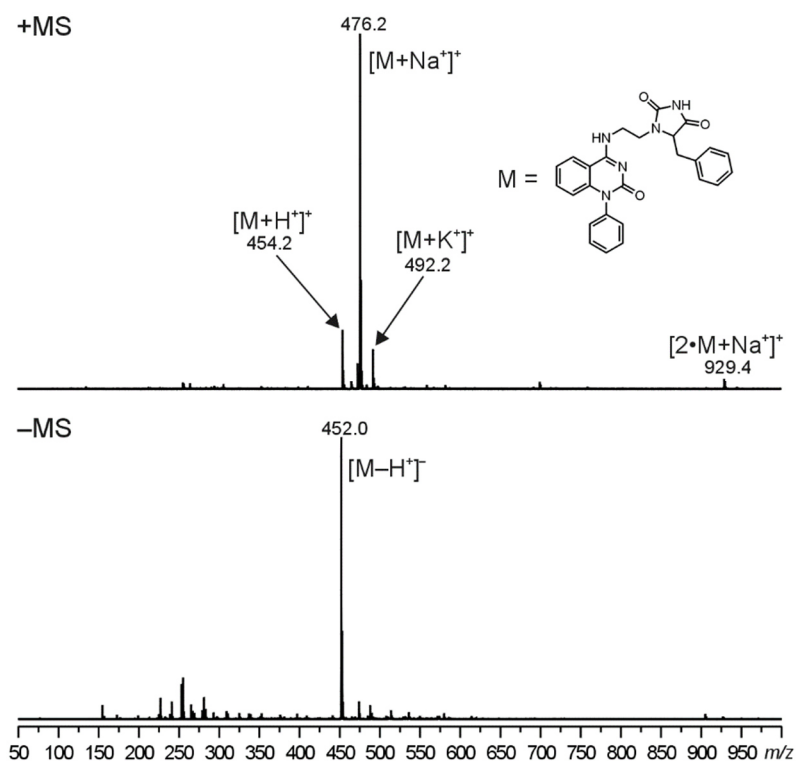

**Figure S48:** The positive and negative-ion ESI mass spectra of compound **5e**. The assignments for observed signals are shown in the brackets.

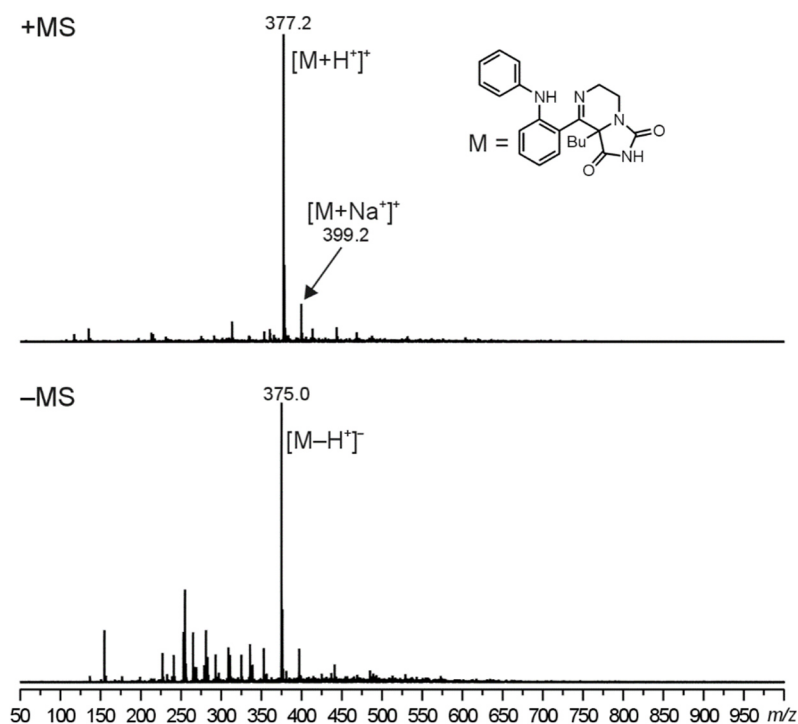

**Figure S49:** The positive and negative-ion ESI mass spectra of compound **6d**. The assignments for observed signals are shown in the brackets.

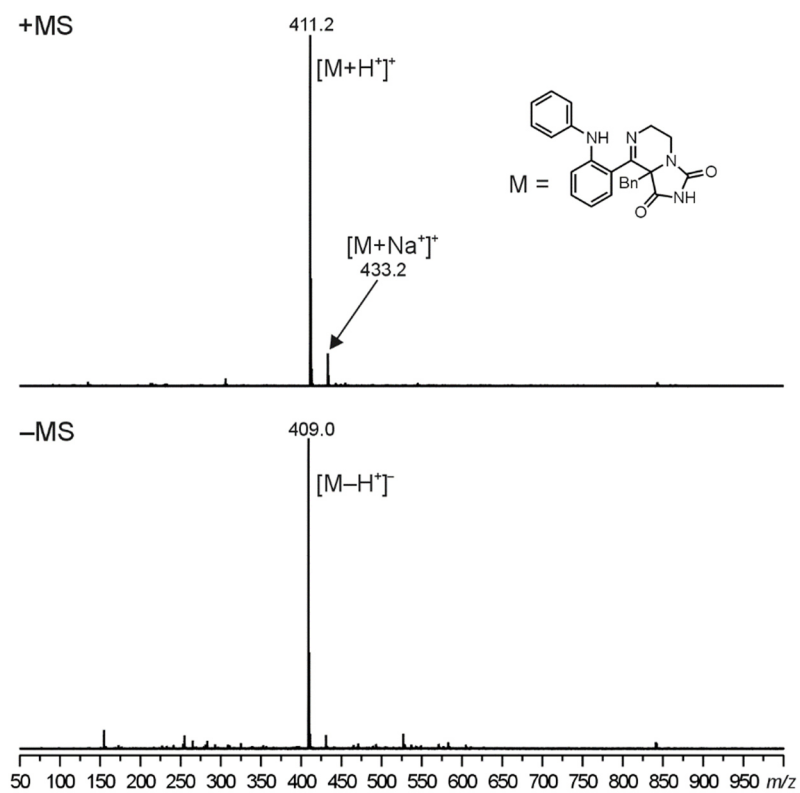

**Figure S50:** The positive and negative-ion ESI mass spectra of compound **6e**. The assignments for observed signals are shown in the brackets.



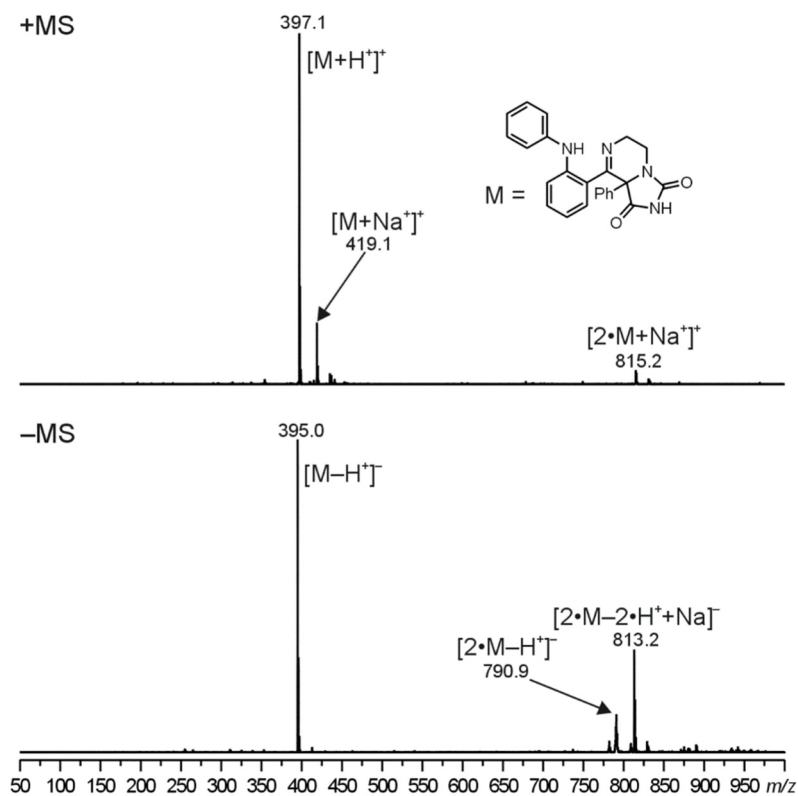

**Figure S51:** The positive and negative-ion ESI mass spectra of compound **6f**. The assignments for observed signals are shown in the brackets.

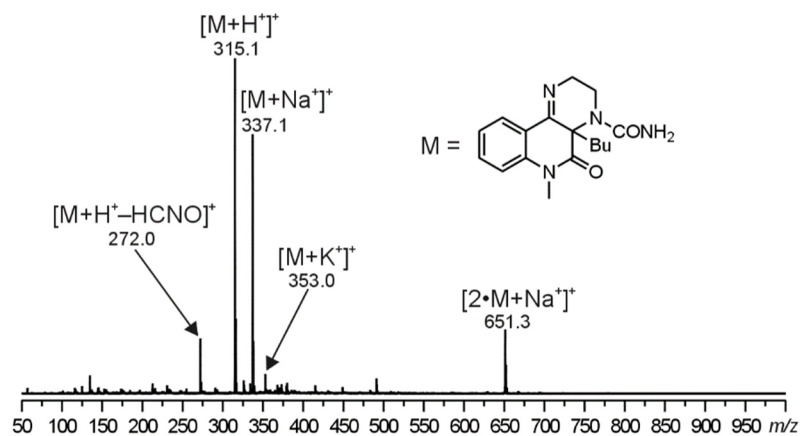

**Figure S52:** The positive-ion ESI mass spectra of compound **7a**. The assignments for observed signals are shown in the brackets.

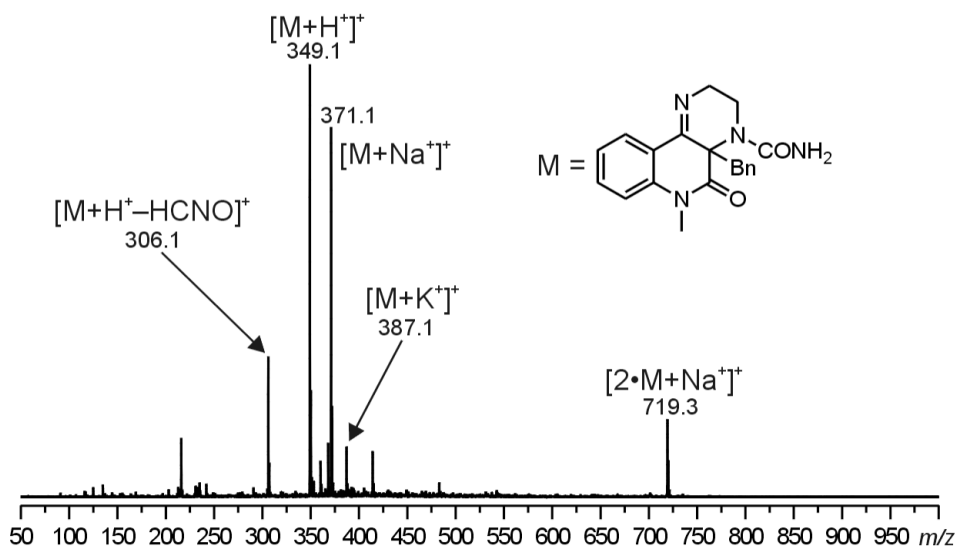

**Figure S53:** The positive -ion ESI mass spectra of compound **7b**. The assignments for observed signals are shown in the brackets.

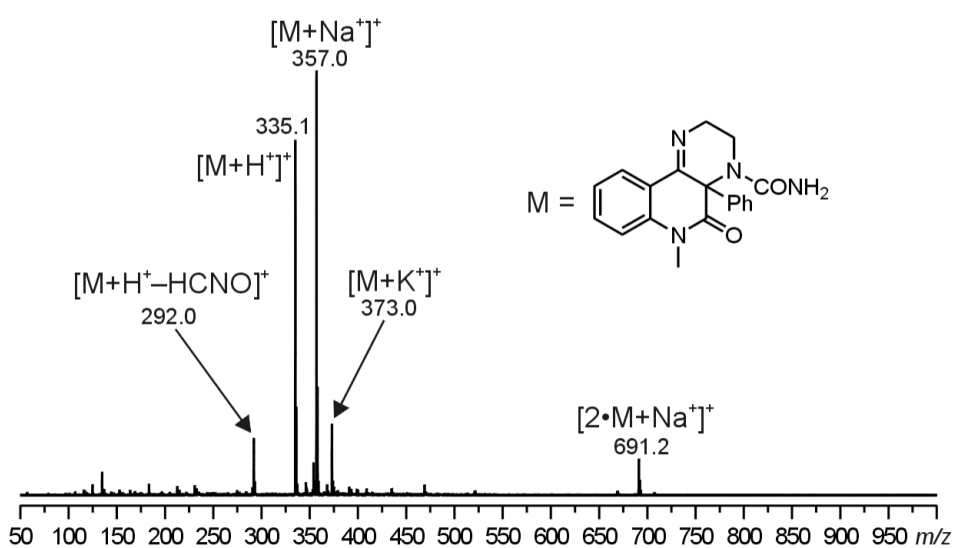

**Figure S54:** The positive -ion ESI mass spectra of compound **7c**. The assignments for observed signals are shown in the brackets.

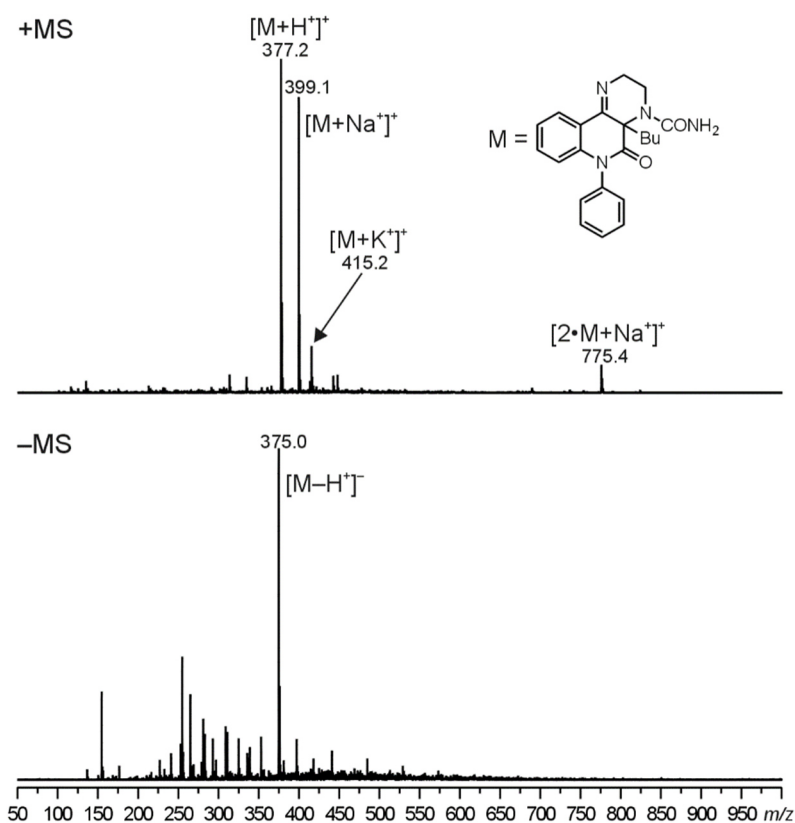

**Figure S55:** The positive and negative-ion ESI mass spectra of compound **7d**. The assignments for observed signals are shown in the brackets.

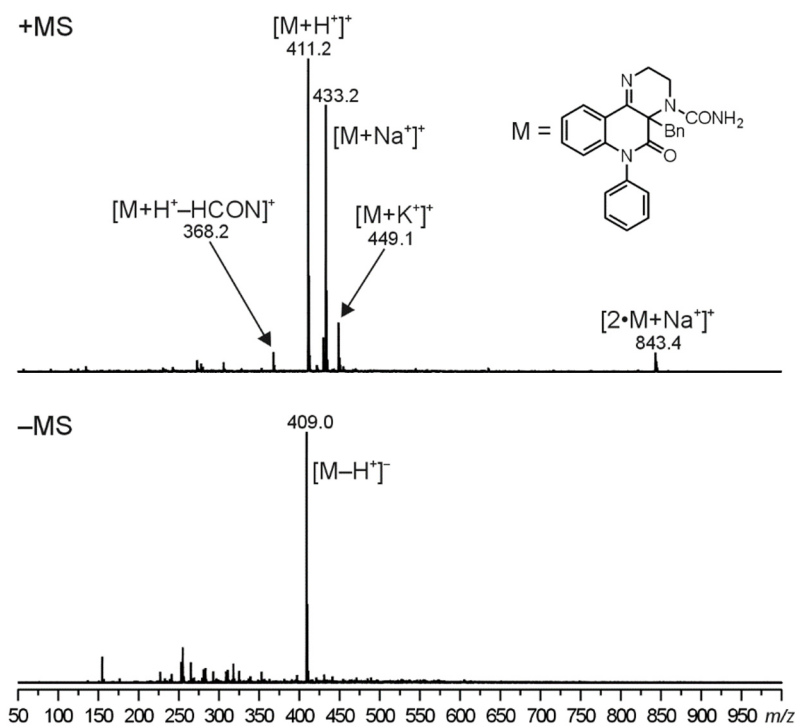

**Figure S56:** The positive and negative-ion ESI mass spectra of compound **7e**. The assignments for observed signals are shown in the brackets.

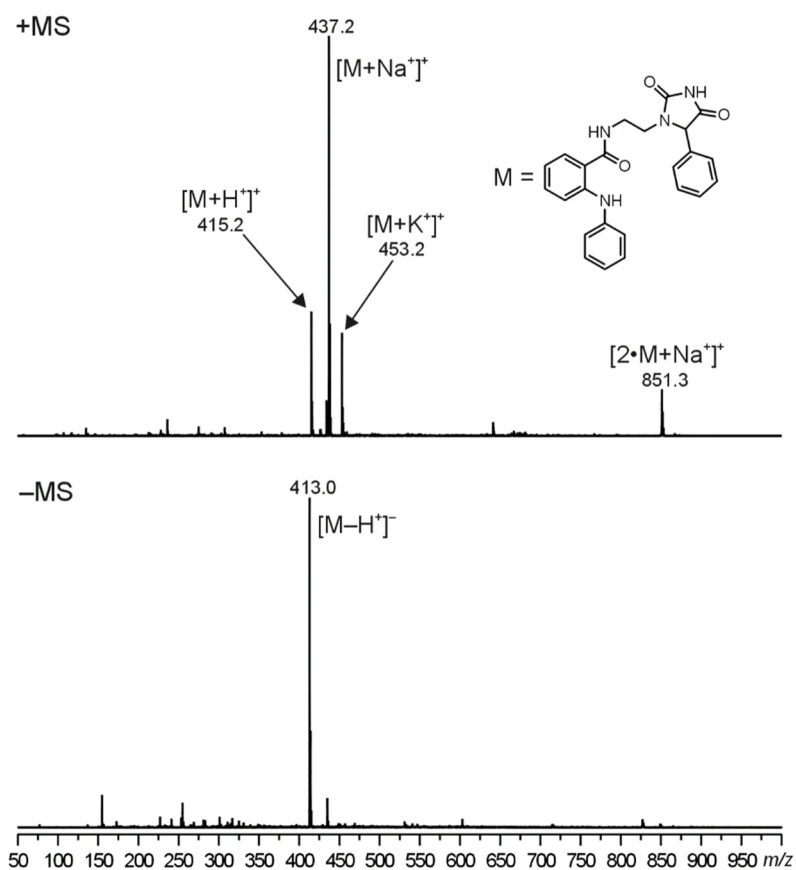

**Figure S57:** The positive and negative-ion ESI mass spectra of compound **8f**. The assignments for observed signals are shown in the brackets.
